# Supplementary material
Source: PubMed Central journal article supplement (PMC549392)
Supplement: nar_33_3_966__1.pdf [file nar_33_3_966__1.pdf]

**Table S1: Overview of TA loci and solitary toxin genes in 126 prokaryotic genomes**

|                   | <i>relBE</i> | <i>parDE</i> | <i>higBA</i> | <i>vapBC</i> | <i>mazEF</i> | <i>phd/doc</i> | <i>ccdAB</i> | Total |
|-------------------|--------------|--------------|--------------|--------------|--------------|----------------|--------------|-------|
| Total in Bacteria | 129          | 59           | 74           | 139          | 67           | 22             | 5            | 495   |
| Total in Archaea  | 27           | 0            | 0            | 146          | 0            | 3              | 0            | 176   |
| Total             | 156          | 59           | 74           | 285          | 67           | 25             | 5            | 671   |
| Orphan            | 13           | 0            | 2            | 13           | 7            | 2              | 0            | 37    |

| Organism                          | <i>relBE</i> | <i>parDE</i> | <i>higBA</i> | <i>vapBC</i> | <i>mazEF</i> | <i>phd/doc</i> | <i>ccdAB</i> | Total |
|-----------------------------------|--------------|--------------|--------------|--------------|--------------|----------------|--------------|-------|
| <b>Archaea</b>                    |              |              |              |              |              |                |              |       |
| <i>Aeropyrum_ Pernix</i>          | 1            | 0            | 0            | 7            | 0            | 0              | 0            | 8     |
| <i>Sulfolobus_solfataricus</i>    | 0            | 0            | 0            | 22           | 0            | 0              | 0            | 22    |
| <i>Sulfolobus_tokodaii</i>        | 2            | 0            | 0            | 25           | 0            | 2              | 0            | 29    |
| <i>Pyrobaculum_aerophilum</i>     | 0            | 0            | 0            | 9            | 0            | 0              | 0            | 9     |
| <i>Archaeoglobus_fulgidus</i>     | 4            | 0            | 0            | 24           | 0            | 0              | 0            | 28    |
| <i>Halobacterium_sp_NRC_1</i>     | 1            | 0            | 0            | 3            | 0            | 0              | 0            | 4     |
| <i>M.thermoautotrophicum</i>      | 0            | 0            | 0            | 2            | 0            | 0              | 0            | 2     |
| <i>Methanococcus_jannaschii</i>   | 4            | 0            | 0            | 5            | 0            | 0              | 0            | 9     |
| <i>Methanopyrus_kandleri_AV19</i> | 0            | 0            | 0            | 1            | 0            | 0              | 0            | 1     |
| <i>Methanosarcina_acetivorans</i> | 8            | 0            | 0            | 3            | 0            | 0              | 0            | 11    |
| <i>Methanosarcina_mazei</i>       | 5            | 0            | 0            | 1            | 0            | 1              | 0            | 7     |
| <i>Pyrococcus_furiosus</i>        | 1            | 0            | 0            | 14           | 0            | 0              | 0            | 15    |
| <i>Pyrococcus_horikoshii</i>      | 1            | 0            | 0            | 11           | 0            | 0              | 0            | 12    |
| <i>Pyrococcus_abyssi</i>          | 0            | 0            | 0            | 16           | 0            | 0              | 0            | 16    |
| <i>Thermoplasma_acidophilum</i>   | 0            | 0            | 0            | 2            | 0            | 0              | 0            | 2     |
| <i>Thermoplasma_volcanium</i>     | 0            | 0            | 0            | 1            | 0            | 0              | 0            | 1     |
| <b>Bacteria</b>                   |              |              |              |              |              |                |              |       |
| <b>Gram Positive</b>              |              |              |              |              |              |                |              |       |
| <i>Bifidobacterium_longum</i>     | 2            | 0            | 0            | 3            | 0            | 0              | 0            | 5     |
| <i>C._glutamicum_ATCC</i>         | 0            | 0            | 1            | 0            | 0            | 0              | 0            | 1     |
| <i>C.efficiens_YS_314</i>         | 0            | 0            | 1            | 0            | 0            | 0              | 0            | 1     |
| <i>Mycobacterium_leprae</i>       | 0            | 0            | 0            | 0            | 0            | 0              | 0            | 0     |
| <i>M._tuberculosis_H37Rv</i>      | 3            | 2            | 1            | 23           | 9            | 0              | 0            | 38    |
| <i>M._tuberculosis_CDC1551</i>    | 3            | 2            | 1            | 23           | 7            | 0              | 0            | 36    |
| <i>S._avermitilis_MA</i>          | 1            | 0            | 0            | 1            | 0            | 2              | 0            | 4     |
| <i>S._coelicolor_A32</i>          | 1            | 0            | 0            | 0            | 0            | 2              | 0            | 3     |
| <i>T._whipplei_Twist</i>          | 0            | 0            | 0            | 0            | 0            | 0              | 0            | 0     |
| <i>T._whipplei_TW08_27</i>        | 0            | 0            | 0            | 0            | 0            | 0              | 0            | 0     |
| <i>Chlorobium_tepidum_TLS</i>     | 0            | 0            | 0            | 0            | 1            | 1              | 0            | 2     |
| <i>Chlamydia_muridarum</i>        | 0            | 0            | 0            | 0            | 0            | 0              | 0            | 0     |
| <i>Chlamydia_trachomatis</i>      | 0            | 0            | 0            | 0            | 0            | 0              | 0            | 0     |
| <i>C._caviae_GPIC</i>             | 0            | 0            | 0            | 0            | 0            | 0              | 0            | 0     |
| <i>C._pneumoniae_CWL029</i>       | 0            | 0            | 0            | 0            | 0            | 0              | 0            | 0     |
| <i>C._pneumoniae_TW_183</i>       | 0            | 0            | 0            | 0            | 0            | 0              | 0            | 0     |
| <i>C._pneumoniae_AR39</i>         | 0            | 0            | 0            | 0            | 0            | 0              | 0            | 0     |
| <i>C._pneumoniae_J138</i>         | 0            | 0            | 0            | 0            | 0            | 0              | 0            | 0     |
| <i>Nostoc_sp_PCC_7120</i>         | 5            | 0            | 3            | 14           | 4            | 1              | 0            | 27    |
| <i>Prochlorococcus_marinus</i>    | 0            | 0            | 0            | 0            | 0            | 0              | 0            | 0     |
| <i>Synechocystis_PCC6803</i>      | 3            | 0            | 1            | 8            | 1            | 0              | 0            | 13    |
| <i>T._elongatus_BP</i>            | 0            | 0            | 0            | 0            | 0            | 0              | 0            | 0     |
| <i>Bacillus_anthraxis</i>         | 0            | 0            | 0            | 0            | 1            | 0              | 0            | 1     |
| <i>Bacillus_cereus</i>            | 0            | 0            | 0            | 0            | 1            | 0              | 0            | 1     |
| <i>Bacillus_halodurans</i>        | 0            | 0            | 0            | 0            | 2            | 0              | 0            | 2     |
| <i>Bacillus_subtilis</i>          | 0            | 0            | 0            | 0            | 1            | 0              | 0            | 1     |
| <i>C._acetobutylicum</i>          | 0            | 0            | 0            | 0            | 1            | 0              | 0            | 1     |

|                              |   |   |   |    |   |   |   |    |
|------------------------------|---|---|---|----|---|---|---|----|
| Clostridium_perfringens      | 0 | 0 | 0 | 0  | 1 | 0 | 0 | 1  |
| Clostridium_tetani_E88       | 0 | 0 | 0 | 0  | 1 | 1 | 0 | 2  |
| E.faecalis_V583              | 1 | 0 | 0 | 0  | 1 | 1 | 0 | 3  |
| Mycoplasma_gallisepticum     | 0 | 0 | 0 | 0  | 0 | 0 | 0 | 0  |
| Mycoplasma_genitalium        | 0 | 0 | 0 | 0  | 0 | 0 | 0 | 0  |
| Mycoplasma_penetrans         | 0 | 0 | 0 | 0  | 0 | 0 | 0 | 0  |
| Mycoplasma_pneumoniae        | 0 | 0 | 0 | 0  | 0 | 0 | 0 | 0  |
| Mycoplasma_pulmonis          | 0 | 0 | 0 | 0  | 0 | 0 | 0 | 0  |
| Ureaplasma_urealyticum       | 0 | 0 | 0 | 0  | 0 | 0 | 0 | 0  |
| Lactobacillus_plantarum      | 0 | 0 | 1 | 0  | 1 | 0 | 0 | 2  |
| Lactococcus_lactis           | 0 | 0 | 0 | 0  | 0 | 0 | 0 | 0  |
| Listeria_innocua             | 0 | 0 | 0 | 0  | 1 | 0 | 0 | 1  |
| Listeria_monocytogenes       | 0 | 0 | 0 | 0  | 1 | 0 | 0 | 1  |
| Oceanobacillus_ihayensis     | 0 | 0 | 0 | 0  | 1 | 0 | 0 | 1  |
| T._tengcongensis             | 3 | 0 | 0 | 2  | 1 | 0 | 0 | 6  |
| S._aureus_MW2                | 2 | 0 | 0 | 0  | 1 | 0 | 0 | 3  |
| S._aureus_N315               | 2 | 0 | 0 | 0  | 1 | 0 | 0 | 3  |
| S._aureus_Mu50               | 2 | 0 | 0 | 0  | 1 | 0 | 0 | 3  |
| S._epidermidis_ATCC_12228    | 0 | 0 | 0 | 0  | 1 | 0 | 0 | 1  |
| S._agalactiae_2603           | 1 | 1 | 0 | 0  | 0 | 0 | 0 | 2  |
| S._agalactiae_NEM316         | 1 | 1 | 0 | 0  | 0 | 0 | 0 | 2  |
| S.mutans_UA159               | 1 | 0 | 0 | 0  | 1 | 0 | 0 | 2  |
| S.pneumonia_TIGR4            | 3 | 0 | 1 | 0  | 0 | 1 | 0 | 5  |
| Streptococcus_pneumonia_R6   | 3 | 0 | 0 | 0  | 0 | 0 | 0 | 3  |
| Streptococcus_pyogenes       | 0 | 2 | 0 | 0  | 0 | 0 | 0 | 2  |
| S._pyogenes_MGAS315          | 0 | 2 | 0 | 0  | 0 | 0 | 0 | 2  |
| S._pyogenes_MGAS8232         | 0 | 2 | 0 | 0  | 0 | 0 | 0 | 2  |
| Streptococcus_pyogenes_SSI_1 | 0 | 2 | 0 | 0  | 0 | 0 | 0 | 2  |
| Fusobacterium_nucleatum      | 3 | 0 | 0 | 0  | 0 | 0 | 0 | 3  |
| Pirellula_sp                 | 1 | 2 | 0 | 0  | 0 | 0 | 0 | 3  |
| <b>Others</b>                |   |   |   |    |   |   |   |    |
| Aquifex_aeolicus             | 0 | 0 | 0 | 2  | 0 | 0 | 0 | 2  |
| Bacteroides_theta_VPI_5482   | 0 | 0 | 2 | 0  | 0 | 0 | 0 | 2  |
| <b>Gram Negative</b>         |   |   |   |    |   |   |   |    |
| Caulobacter_crescentus       | 4 | 4 | 1 | 1  | 0 | 1 | 0 | 11 |
| A._tumefaciens_C58           | 6 | 3 | 0 | 2  | 1 | 0 | 0 | 12 |
| A._tumefaciens_C58_linear    | 1 | 0 | 0 | 1  | 0 | 0 | 0 | 2  |
| A._tumef._C58_Wash           | 6 | 3 | 0 | 2  | 1 | 0 | 0 | 12 |
| A._tumef._C58_Wash_linear    | 1 | 0 | 0 | 1  | 0 | 0 | 0 | 2  |
| Bradyrhizobium_japonicum     | 0 | 0 | 4 | 1  | 0 | 0 | 0 | 5  |
| Brucella_melitensis_chr_I    | 1 | 0 | 0 | 0  | 0 | 1 | 0 | 2  |
| Brucella_melitensis_chr_II   | 0 | 0 | 0 | 0  | 1 | 0 | 0 | 1  |
| Brucella_suis_chromosome_I   | 1 | 0 | 0 | 0  | 0 | 1 | 0 | 2  |
| Brucella_suis_chromosome_II  | 0 | 0 | 0 | 0  | 1 | 0 | 0 | 1  |
| Mesorhizobium_loti           | 1 | 3 | 2 | 4  | 0 | 0 | 0 | 10 |
| S._meliloti_1021_chr         | 2 | 0 | 3 | 7  | 0 | 0 | 0 | 12 |
| Rickettsia_conorii_Malish    | 1 | 0 | 1 | 3  | 1 | 0 | 0 | 6  |
| Rickettsia_prowazekii        | 0 | 0 | 0 | 0  | 0 | 0 | 0 | 0  |
| Coxiella_burnetii            | 1 | 1 | 3 | 2  | 0 | 0 | 0 | 7  |
| Ralstonia_solanacearum_chr   | 2 | 0 | 0 | 2  | 0 | 0 | 0 | 4  |
| Neisseria_meningitidis_MC58  | 0 | 0 | 0 | 1  | 2 | 1 | 0 | 4  |
| Neisseria_meningitidis_Z2491 | 0 | 0 | 0 | 0  | 1 | 0 | 0 | 1  |
| Nitrosomonas_europaea        | 9 | 6 | 7 | 13 | 5 | 2 | 1 | 43 |
| Campylobacter_jejuni         | 0 | 0 | 0 | 0  | 0 | 0 | 0 | 0  |
| Helicobacter_hepaticus       | 0 | 0 | 0 | 0  | 0 | 0 | 0 | 0  |
| Helicobacter_pylori_26695    | 3 | 0 | 0 | 0  | 0 | 0 | 0 | 3  |

|                               |   |   |   |   |   |   |   |    |
|-------------------------------|---|---|---|---|---|---|---|----|
| Helicobacter_pylori_J99       | 1 | 0 | 0 | 0 | 0 | 0 | 0 | 1  |
| Buchnera_sp_APS               | 0 | 0 | 0 | 0 | 0 | 0 | 0 | 0  |
| Buchnera_aphidicola           | 0 | 0 | 0 | 0 | 0 | 0 | 0 | 0  |
| Buchnera_aphidicola_Sg        | 0 | 0 | 0 | 0 | 0 | 0 | 0 | 0  |
| Escherichia_coli_CFT073       | 1 | 0 | 3 | 0 | 0 | 0 | 1 | 5  |
| Escherichia_coli_K12          | 3 | 0 | 0 | 0 | 2 | 0 | 0 | 5  |
| Escherichia_coli_O157         | 1 | 3 | 1 | 0 | 2 | 0 | 1 | 8  |
| E._coli_O157_H7_EDL933        | 1 | 3 | 1 | 0 | 2 | 0 | 1 | 8  |
| Salmonella_typhimurium_LT2    | 3 | 1 | 2 | 1 | 0 | 1 | 0 | 8  |
| Salmonella_typhi              | 1 | 1 | 1 | 2 | 0 | 1 | 0 | 6  |
| Salmonella_typhi_Ty2          | 1 | 1 | 1 | 2 | 0 | 1 | 0 | 6  |
| Shigella_flexneri_2a          | 2 | 0 | 0 | 0 | 1 | 0 | 0 | 3  |
| Shigella_flexneri_2a_2457T    | 2 | 0 | 0 | 0 | 0 | 0 | 0 | 2  |
| Wigglesworthia_brevipalpis    | 0 | 0 | 0 | 0 | 0 | 0 | 0 | 0  |
| Yersinia_pestis_CO92          | 0 | 0 | 4 | 0 | 0 | 1 | 0 | 5  |
| Yersinia_pestis_KIM           | 1 | 0 | 3 | 0 | 0 | 1 | 0 | 5  |
| S._oneidensis_MR              | 1 | 1 | 0 | 0 | 0 | 0 | 0 | 2  |
| Vibrio_cholerae               | 7 | 3 | 2 | 0 | 0 | 1 | 0 | 13 |
| Vibrio_parahaemolyticus       | 3 | 1 | 0 | 0 | 0 | 0 | 0 | 4  |
| V.vulnificus_CMCP6_chr_1      | 3 | 1 | 0 | 0 | 0 | 0 | 0 | 4  |
| V.vulnificus_CMCP6_chr_2      | 1 | 0 | 0 | 0 | 0 | 0 | 0 | 1  |
| X_axonopodis_pv_citri_str_306 | 1 | 2 | 0 | 3 | 0 | 1 | 0 | 7  |
| X._campestris_pv_ATCC_33913   | 3 | 1 | 0 | 2 | 0 | 0 | 1 | 7  |
| Xylella_fastidiosa_chr        | 4 | 2 | 8 | 2 | 1 | 0 | 0 | 17 |
| Xylella_fastidiosa_Temecula1  | 2 | 1 | 4 | 1 | 0 | 0 | 0 | 8  |
| Haemophilus_influenzae        | 1 | 0 | 3 | 2 | 0 | 0 | 0 | 6  |
| Haemophilus_ducreyi_35000HP   | 0 | 0 | 0 | 0 | 0 | 0 | 0 | 0  |
| Pasteurella_multocida         | 0 | 0 | 0 | 0 | 0 | 0 | 0 | 0  |
| Pseudomonas_aeruginosa        | 1 | 1 | 1 | 0 | 0 | 0 | 0 | 3  |
| Pseudomonas_putida_KT2440     | 2 | 0 | 4 | 0 | 1 | 0 | 0 | 7  |
| Pseudomonas_syringae          | 3 | 1 | 3 | 2 | 0 | 0 | 0 | 9  |
| Borrelia_burgdorferi          | 0 | 0 | 0 | 0 | 0 | 0 | 0 | 0  |
| Leptospira_intrerrogans_I     | 0 | 0 | 0 | 3 | 2 | 0 | 0 | 5  |
| Treponema_pallidum            | 0 | 0 | 0 | 0 | 0 | 0 | 0 | 0  |
| Thermotoga_maritima           | 0 | 0 | 0 | 0 | 0 | 0 | 0 | 0  |
| D._radiodurans_chr_1          | 0 | 0 | 0 | 3 | 2 | 0 | 0 | 5  |

**Solitary toxin genes** 13 0 2 13 7 2 0 37

| Organism                   | relBE | parDE | higBA | vapBC | mazEF | phd/doc | ccdAB | Total |
|----------------------------|-------|-------|-------|-------|-------|---------|-------|-------|
| <b>Archaea</b>             |       |       |       |       |       |         |       |       |
| Aeropyrum_ernix            | 0     | 0     | 0     | 1     | 0     | 0       | 0     | 1     |
| Sulfolobus_solfataricus    | 0     | 0     | 0     | 1     | 0     | 0       | 0     | 1     |
| Sulfolobus_tokodaii        | 2     | 0     | 0     | 0     | 0     | 1       | 0     | 3     |
| Pyrobaculum_aerophilum     | 0     | 0     | 0     | 2     | 0     | 0       | 0     | 2     |
| Methanopyrus_kandleri_AV19 | 0     | 0     | 0     | 1     | 0     | 0       | 0     | 1     |
| Methanosarcina_acetivorans | 0     | 0     | 0     | 1     | 0     | 0       | 0     | 1     |
| Methanosarcina_mazei       | 0     | 0     | 0     | 2     | 0     | 0       | 0     | 2     |
| Pyrococcus_furiosus        | 0     | 0     | 0     | 2     | 0     | 0       | 0     | 2     |
| Pyrococcus_horikoshii      | 2     | 0     | 0     | 0     | 0     | 0       | 0     | 2     |
| Pyrococcus_abyssi          | 1     | 0     | 0     | 0     | 0     | 0       | 0     | 1     |
| Thermoplasma_acidophilum   | 1     | 0     | 0     | 0     | 0     | 0       | 0     | 1     |
| Thermoplasma_volcanium     | 0     | 0     | 0     | 1     | 0     | 0       | 0     | 1     |
| <b>Bacteria</b>            |       |       |       |       |       |         |       |       |
| <b>Gram Positive</b>       |       |       |       |       |       |         |       |       |
| Bifidobacterium_longum     | 0     | 0     | 1     | 0     | 0     | 0       | 0     | 1     |

| Organism                         | <i>relBE</i> | <i>parDE</i> | <i>higBA</i> | <i>vapBC</i> | <i>mazEF</i> | <i>phd/doc</i> | <i>ccdAB</i> | Total |
|----------------------------------|--------------|--------------|--------------|--------------|--------------|----------------|--------------|-------|
| <i>S._avermitilis_MA</i>         | 0            | 0            | 0            | 0            | 1            | 0              | 0            | 1     |
| <i>Nostoc_sp_PCC_7120</i>        | 1            | 0            | 0            | 0            | 1            | 0              | 0            | 2     |
| <i>Synechocystis_PCC6803</i>     | 0            | 0            | 0            | 1            | 0            | 0              | 0            | 1     |
| <i>C._acetobutylicum</i>         | 0            | 0            | 0            | 0            | 1            | 0              | 0            | 1     |
| <i>Clostridium_perfringens</i>   | 0            | 0            | 0            | 0            | 0            | 1              | 0            | 1     |
| <i>E.faecalis_V583</i>           | 0            | 0            | 0            | 0            | 2            | 0              | 0            | 2     |
| <i>Lactobacillus_plantarum</i>   | 0            | 0            | 0            | 0            | 1            | 0              | 0            | 1     |
| <i>S.mutans_UA159</i>            | 1            | 0            | 0            | 0            | 0            | 0              | 0            | 1     |
| <b>Gram_negative</b>             |              |              |              |              |              |                |              |       |
| <i>Rickettsia_conorii_Malish</i> | 0            | 0            | 0            | 0            | 1            | 0              | 0            | 1     |
| <i>Nitrosomonas_europaea</i>     | 1            | 0            | 0            | 1            | 0            | 0              | 0            | 2     |
| <i>Helicobacter_pylori_J99</i>   | 1            | 0            | 0            | 0            | 0            | 0              | 0            | 1     |
| <i>Yersinia_pestis_CO92</i>      | 1            | 0            | 0            | 0            | 0            | 0              | 0            | 1     |
| <i>Yersinia_pestis_KIM</i>       | 1            | 0            | 0            | 0            | 0            | 0              | 0            | 1     |
| <i>Pseudomonas_putida_KT2440</i> | 0            | 0            | 1            | 0            | 0            | 0              | 0            | 1     |
| <i>Leptospira_intrerrogans_I</i> | 1            | 0            | 0            | 0            | 0            | 0              | 0            | 1     |

**Table S2: List of 671 TA loci and 37 solitary toxin genes in 126 genomes**

| TA-loci <sup>a)</sup>                                          | Antitoxin/Toxin GIs <sup>b)</sup> | sizes <sup>c)</sup><br>(codons) | dist. <sup>d)</sup><br>(bp) | Comments <sup>e)</sup>                                            |
|----------------------------------------------------------------|-----------------------------------|---------------------------------|-----------------------------|-------------------------------------------------------------------|
| <b>Archaea</b>                                                 |                                   |                                 |                             |                                                                   |
| <b><u>Aeropyrum pernix<sup>f)</sup></u> 14600379 1,669,695</b> |                                   |                                 |                             |                                                                   |
| <i>relBE-1</i>                                                 | 984865-985164,14602207            | 100,94                          | +49                         | New putative <i>relB</i>                                          |
| <i>vapBC-1</i>                                                 | c199314-199072,14600586           | 81,144                          | -20                         | New putative <i>vapB</i>                                          |
| <i>vapBC-2</i>                                                 | 14600594,14600593                 | 75,122                          | +82                         |                                                                   |
| <i>vapBC-3</i>                                                 | c697607-697245,14601184           | 121,139                         | -35                         | New putative <i>vapB</i>                                          |
| <i>vapBC-4</i>                                                 | c760494-760258,14602203           | 79,141                          | -20                         | New putative <i>vapB</i>                                          |
| <i>vapBC-5</i>                                                 | c1008442-1008167,14601503         | 92,132                          | -20                         | New putative <i>vapB</i>                                          |
| <i>vapBC-6</i>                                                 | c1508755-1508399,14602022         | 119,162                         | -76                         | New putative <i>vapB</i>                                          |
| <i>vapBC-7</i>                                                 | c1666639-1666448,14602179         | 64,141                          | +3                          | New putative <i>vapB</i>                                          |
| <i>vapBC-8</i>                                                 | -,14602218                        | -,87                            | NA                          | Solitary <i>vapB</i>                                              |
| <b><u>Sulfolobus solfataricus</u> 15896971 2,992,245</b>       |                                   |                                 |                             |                                                                   |
| <i>vapBC-1</i>                                                 | 360012-360608,15897346            | 199,145                         | -34                         | New putative <i>vapB</i>                                          |
| <i>vapBC-2</i>                                                 | c683385-683083,15897701           | 101,130                         | -12                         | New putative <i>vapB</i>                                          |
| <i>vapBC-3</i>                                                 | c725687-725481,15897743           | 69,52                           | -8                          | New putative <i>vapB</i>                                          |
| <i>vapBC-4</i>                                                 | 1073660-1073923,15898090          | 88,130                          | -8                          | New putative <i>vapB</i> ,<br><i>vapBC-4=vapBC-17</i>             |
| <i>vapBC-5</i>                                                 | 1340360-1340617,15898313          | 86,148                          | -68                         | New putative <i>vapB</i>                                          |
| <i>vapBC-6</i>                                                 | 15898324,15898323                 | 100,107                         | +61                         |                                                                   |
| <i>vapBC-7</i>                                                 | c1503996-1503685,15898469         | 104,131                         | -14                         | New putative <i>vapB</i>                                          |
| <i>vapBC-8</i>                                                 | 15898475,15898476                 | 79,126                          | -35                         |                                                                   |
| <i>vapBC-9</i>                                                 | c1577585-1577400,15898541         | 62,90                           | +117                        | New putative <i>vapB</i>                                          |
| <i>vapBC-10</i>                                                | 1582391-1582642,15898547          | 84,131                          | +12                         | New putative <i>vapB</i>                                          |
| <i>vapBC-11</i>                                                | 1620321-1620638,15898585          | 106,143                         | -25                         | New putative <i>vapB</i>                                          |
| <i>vapBC-12</i>                                                | 15898659,15898660                 | 115,204                         | +17                         |                                                                   |
| <i>vapBC-13</i>                                                | c1734033-1733776,15898712         | 86,137                          | -17                         | New putative <i>vapB</i>                                          |
| <i>vapBC-14</i>                                                | 1742082-1742303,15898722          | 74,131                          | -11                         | New putative <i>vapB</i>                                          |
| <i>vapBC-15</i>                                                | 15898765,15898764                 | 91,128                          | -14                         |                                                                   |
| <i>vapBC-16</i>                                                | 1783470-1783712,15898766          | 81,132                          | -20                         | New putative <i>vapB</i>                                          |
| <i>vapBC-17</i>                                                | 1784438-1784701,15898767          | 88,130                          | -8                          | New putative <i>vapB</i> ,<br><i>vapBC-17=vapBC-4</i>             |
| <i>vapBC-18</i>                                                | c1788331-1788080,15898771         | 84,125                          | -32                         | New putative <i>vapB</i>                                          |
| <i>vapBC-19</i>                                                | 1914151-1914375,15898880          | 75,123                          | -22                         | New putative <i>vapB</i>                                          |
| <i>vapBC-20</i>                                                | c2041164-2040874,15898992         | 97,158                          | -14                         | New putative <i>vapB</i>                                          |
| <i>vapBC-21</i>                                                | -,15899310                        | -,126                           | NA                          | Solitary <i>vapB</i>                                              |
| <i>vapBC-22</i>                                                | 15899784,15899783                 | 73,134                          | -20                         |                                                                   |
| <i>vapBC-23</i>                                                | 15899834,15899833                 | 81,133                          | -23                         |                                                                   |
| <b><u>Sulfolobus tokodaii</u> 24473558 2,694,756</b>           |                                   |                                 |                             |                                                                   |
| <i>relBE-1</i>                                                 | -,15920339                        | -,102                           | NA                          | Solitary <i>relE</i>                                              |
| <i>relBE-2</i>                                                 | 15920437,15920438                 | 97,95                           | -8                          |                                                                   |
| <i>relBE-3</i>                                                 | -,15922162                        | -,103                           | NA                          | Solitary <i>relE</i>                                              |
| <i>relBE-4</i>                                                 | 15922557,15922558                 | 67,105                          | +47                         |                                                                   |
| <i>vapBC-1</i>                                                 | c2516-2271,15920165               | 82,96                           | -14                         | New putative <i>vapB</i>                                          |
| <i>vapBC-2</i>                                                 | 15920187,15920188                 | 77,129                          | +26                         |                                                                   |
| <i>vapBC-3</i>                                                 | 15920210,15920209                 | 84,128                          | -8                          |                                                                   |
| <i>vapBC-4</i>                                                 | c397414-397157,15920583           | 86,143                          | -34                         | New putative <i>vapB</i>                                          |
| <i>vapBC-5</i>                                                 | c673537-673358,c673011-673379     | 60,123                          | -22                         | New putative <i>vapB</i> ; <i>vapC</i><br>corrected (gi 15920915) |
| <i>vapBC-6</i>                                                 | 15920970,15920969                 | 79,124                          | +13                         |                                                                   |
| <i>vapBC-7</i>                                                 | 761620-761892,15921016            | 91,131                          | -8                          | New putative <i>vapB</i>                                          |
| <i>vapBC-8</i>                                                 | 15921073,15921074                 | 73,133                          | -20                         |                                                                   |
| <i>vapBC-9</i>                                                 | 15921133,15921134                 | 68,125                          | +25                         |                                                                   |
| <i>vapBC-10</i>                                                | 15921142,15921141                 | 95,115                          | +10                         |                                                                   |
| <i>vapBC-11</i>                                                | 15921355,15921356                 | 78,107                          | +55                         |                                                                   |
| <i>vapBC-12</i>                                                | 15921382,15921381                 | 84,125                          | -35                         |                                                                   |
| <i>vapBC-13</i>                                                | c1303456-1303313,c1302999-1303355 | 48,119                          | -44                         | New putative <i>vapB</i> ; <i>vapC</i><br>corrected (gi 15921568) |
| <i>vapBC-14</i>                                                | 15921894,15921893                 | 125,204                         | +13                         |                                                                   |
| <i>vapBC-15</i>                                                | 15921930,15921931                 | 88,155                          | -65                         |                                                                   |

|                   |                           |         |     |                          |
|-------------------|---------------------------|---------|-----|--------------------------|
| <i>vapBC</i> -16  | 15921943,15921942         | 100,109 | +74 |                          |
| <i>vapBC</i> -17  | 15921944,15921945         | 110,134 | -17 |                          |
| <i>vapBC</i> -18  | 15921992,15921991         | 102,144 | -20 |                          |
| <i>vapBC</i> -19  | 1818807-1819082,15922115  | 92,130  | -14 | New putative <i>vapB</i> |
| <i>vapBC</i> -20  | 15922247,15922248         | 127,185 | -11 |                          |
| <i>vapBC</i> -21  | 15922259,15922260         | 73,133  | -28 |                          |
| <i>vapBC</i> -22  | 15922315,2013264-2013695  | 75,144  | -41 | New putative <i>vapC</i> |
| <i>vapBC</i> -23  | 15922329,15922330         | 70,117  | +56 |                          |
| <i>vapBC</i> -24  | 2138189-2138767,15922464  | 193,162 | -23 | New putative <i>vapB</i> |
| <i>vapBC</i> -25  | 15922519,15922520         | 81,105  | +61 |                          |
| <i>phd/doc</i> -1 | 1143830-1143531,15921403  | 97,152  | +17 | New putative <i>doc</i>  |
| <i>phd/doc</i> -2 | -,c1317467-1317895        | -,143   | NA  | Solitary <i>doc</i>      |
| <i>phd/doc</i> -3 | 15921597,c1328737-1329249 | 91,171  | -28 | New putative <i>doc</i>  |

**Pyrobaculum aerophilum 18311643|2,222,430**

|                  |                          |         |     |                          |
|------------------|--------------------------|---------|-----|--------------------------|
| <i>vapBC</i> -1  | 18311665,18311666        | 66,125  | +13 |                          |
| <i>vapBC</i> -2  | 18311711,18311712        | 75,126  | -26 |                          |
| <i>vapBC</i> -3  | 18311748,18311747        | 77,131  | -17 |                          |
| <i>vapBC</i> -4  | -,18311834               | -,130   | NA  | Solitary <i>vapC</i>     |
| <i>vapBC</i> -5  | 18311873,18311874        | 94,146  | -4  |                          |
| <i>vapBC</i> -6  | 335372-335986,18312054   | 204,111 | -1  | New putative <i>vapB</i> |
| <i>vapBC</i> -7  | -,18313350               | -,165   | NA  | Solitary <i>vapC</i>     |
| <i>vapBC</i> -8  | 18313510,18313509        | 116,125 | -4  |                          |
| <i>vapBC</i> -9  | 18313566,18313565        | 74,133  | -11 |                          |
| <i>vapBC</i> -10 | 18313617,18313618        | 74,137  | -17 |                          |
| <i>vapBC</i> -11 | 2133278-2133844,18314154 | 189,110 | -1  | New putative <i>vapB</i> |

**Archaeoglobus fulgidus 11497621|2,178,400**

|                  |                           |         |     |                          |
|------------------|---------------------------|---------|-----|--------------------------|
| <i>relBE</i> -1  | 11498680,11498679         | 62,92   | -16 |                          |
| <i>relBE</i> -2  | 11498685,11498684         | 57,86   | -8  |                          |
| <i>relBE</i> -3  | 11498694,11498693         | 72,85   | -4  |                          |
| <i>relBE</i> -4  | 11499924,11499923         | 65,87   | -8  |                          |
| <i>vapBC</i> -1  | 11497686,11497685         | 62,137  | -4  |                          |
| <i>vapBC</i> -2  | C271532-271335,11497909   | 66,151  | -7  | New putative <i>vapB</i> |
| <i>vapBC</i> -3  | 287426-287674,11497927    | 84,150  | -1  | New putative <i>vapB</i> |
| <i>vapBC</i> -4  | 11497928,11497929         | 64,143  | -23 |                          |
| <i>vapBC</i> -5  | 289024-289218,11497931    | 64,149  | -4  | New putative <i>vapB</i> |
| <i>vapBC</i> -6  | 289639-289923,11497932    | 95,151  | -20 | New putative <i>vapB</i> |
| <i>vapBC</i> -7  | 290594-290764,11497934    | 57,93   | -44 |                          |
| <i>vapBC</i> -8  | 350180-350689,11497997    | 170,166 | +33 | New putative <i>vapB</i> |
| <i>vapBC</i> -9  | c534011-533655,11498199   | 119,135 | -41 | New putative <i>vapB</i> |
| <i>vapBC</i> -10 | c556664-556485,11498226   | 60,96   | +72 | New putative <i>vapB</i> |
| <i>vapBC</i> -11 | 11498682,11498681         | 45,130  | -17 |                          |
| <i>vapBC</i> -12 | c981711-981451,11498689   | 87,141  | -1  | New putative <i>vapB</i> |
| <i>vapBC</i> -13 | 11498692,11498691         | 61,139  | -17 |                          |
| <i>vapBC</i> -14 | c1236899-1236693,11498981 | 69,149  | -17 | New putative <i>vapB</i> |
| <i>vapBC</i> -15 | 11499073,11499074         | 71,130  | -14 |                          |
| <i>vapBC</i> -16 | 11499279,11499280         | 73,136  | -11 |                          |
| <i>vapBC</i> -17 | 11499302,11499301         | 71,147  | -14 |                          |
| <i>vapBC</i> -18 | 11499579,11499578         | 73,84   | -35 |                          |
| <i>vapBC</i> -19 | 11499593,11499594         | 86,137  | -35 |                          |
| <i>vapBC</i> -20 | 11499771,11499772         | 72,136  | -14 |                          |
| <i>vapBC</i> -21 | 1978461-1978667,11499795  | 69,72   | +26 | New putative <i>vapB</i> |
| <i>vapBC</i> -22 | 11499936,11499937         | 75,134  | -4  |                          |
| <i>vapBC</i> -23 | c980157-979951,11500021   | 70,144  | -17 | New putative <i>vapB</i> |
| <i>vapBC</i> -24 | c550521-550279,11546068   | 81,111  | -17 | New putative <i>vapB</i> |

**Halobacterium sp\_NRC\_1 15789340|2,014,239**

|                 |                           |         |     |                          |
|-----------------|---------------------------|---------|-----|--------------------------|
| <i>relBE</i> -1 | 15789403,15789404         | 65,97   | -11 |                          |
| <i>vapBC</i> -1 | c67955-67662,15789405     | 98,144  | -1  | New putative <i>vapB</i> |
| <i>vapBC</i> -2 | c1474604-1474407,15790862 | 66,109  | -1  | New putative <i>vapB</i> |
| <i>vapBC</i> -3 | c1510923-1510639,15790906 | 105,127 | +7  | New putative <i>vapB</i> |

**M.thermoautotrophicum 15678031|1,751,377**

|                 |                          |         |     |                          |
|-----------------|--------------------------|---------|-----|--------------------------|
| <i>vapBC</i> -1 | 202303-202899,15678290   | 199,119 | +27 | New putative <i>vapB</i> |
| <i>vapBC</i> -2 | 1698784-1698945,15679850 | 54,171  | +20 | New putative <i>vapB</i> |

**Methanococcus jannaschii 15668172|1,664,970**

|                 |                           |       |    |                          |
|-----------------|---------------------------|-------|----|--------------------------|
| <i>relBE</i> -1 | 15668241,15668242         | 82,90 | -4 |                          |
| <i>relBE</i> -2 | 840765-840947,15669099    | 61,91 | -1 | New putative <i>vapB</i> |
| <i>relBE</i> -3 | c1043988-1044146,15669291 | 53,88 | -1 | New putative <i>vapB</i> |

|                                                             |                                 |         |     |                                                 |
|-------------------------------------------------------------|---------------------------------|---------|-----|-------------------------------------------------|
| <i>relBE-4</i>                                              | 15669361,15669362               | 84,94   | 0   |                                                 |
| <i>vapBC-1</i>                                              | c846334-846143,15669104         | 64,136  | +47 | New putative <i>vapB</i>                        |
| <i>vapBC-2</i>                                              | 15669165,15669164               | 68,149  | -29 |                                                 |
| <i>vapBC-3</i>                                              | 15669309,15669308               | 77,94   | -28 |                                                 |
| <i>vapBC-4</i>                                              | c1268398-1268213,15669510       | 62,131  | +23 | New putative <i>vapB</i>                        |
| <i>vapBC-5</i>                                              | 1445372-1445695,15669666        | 108,197 | -5  | New putative <i>vapB</i>                        |
| <b><u>Methanopyrus kandleri AV19</u> 20093440 1,694,969</b> |                                 |         |     |                                                 |
| <i>vapBC-1</i>                                              | -,20094181                      | -,143   | NA  | Solitary <i>vapC</i>                            |
| <i>vapBC-2</i>                                              | 1478697-1479293,20094884        | 199,130 | +9  | New putative <i>vapB</i>                        |
| <b><u>Methanosarcina acetivorans</u> 20088899 5,751,492</b> |                                 |         |     |                                                 |
| <i>relBE-1</i>                                              | 20088947,20088948               | 74,83   | +68 | Similar to 21228707                             |
| <i>relBE-2</i>                                              | 20089272,20089273               | 93,87   | -13 |                                                 |
| <i>relBE-3</i>                                              | 1172771-1172992,20089858        | 74,89   | -8  | New putative <i>relB</i>                        |
| <i>relBE-4</i>                                              | 20090545,20090546               | 69,87   | -4  |                                                 |
| <i>relBE-5</i>                                              | 20091001,20091002               | 89,64   | +6  |                                                 |
| <i>relBE-6</i>                                              | 3293160-3293339,3293349-3293555 | 60,69   | +9  | New putative <i>relBE</i>                       |
| <i>relBE-7</i>                                              | 20092309,20092310               | 80,93   | -4  |                                                 |
| <i>relBE-8</i>                                              | 20093070,20093069               | 96,92   | +9  |                                                 |
| <i>vapBC-1</i>                                              | -,20089798                      | -,180   | NA  | Solitary <i>vapC</i>                            |
| <i>vapBC-2</i>                                              | 1173673-1173882,20089859        | 70,117  | -10 | New putative <i>vapB</i>                        |
| <i>vapBC-3</i>                                              | 20090373,20090374               | 77,133  | -4  |                                                 |
| <i>vapBC-4</i>                                              | 4548892-4549509,20092491        | 206,121 | -1  | New putative <i>vapB</i>                        |
| <b><u>Methanosarcina mazei</u> 21226102 4,096,345</b>       |                                 |         |     |                                                 |
| <i>relBE-1</i>                                              | 21227970,21227969               | 88,67   | +14 |                                                 |
| <i>relBE-2</i>                                              | 21228652,21228651               | 79,86   | +4  |                                                 |
| <i>relBE-3</i>                                              | 21228701,21228702               | 64,93   | -4  |                                                 |
| <i>relBE-4</i>                                              | 21228706,21228707               | 63,92   | -1  | Similar to 20088948                             |
| <i>relBE-5</i>                                              | 21228783,21228782               | 93,86   | -13 |                                                 |
| <i>vapBC-1</i>                                              | 726480-727034,21226697          | 185,121 | -1  | New putative <i>vapB</i>                        |
| <i>vapBC-2</i>                                              | -,21228138                      | -,189   | NA  | Solitary <i>vapC</i>                            |
| <i>vapBC-3</i>                                              | -,21229222                      | -,127   | NA  | Solitary <i>vapC</i> , pseudo <i>vapB</i>       |
| <i>phd/doc-1</i>                                            | 21226652,21226651               | 83,134  | -14 |                                                 |
| <b><u>Pyrococcus furiosus</u> 18976372 1,908,256</b>        |                                 |         |     |                                                 |
| <i>relBE-1</i>                                              | c841447-841569,18977239         | 41,103  | -38 | New putative <i>relB</i>                        |
| <i>vapBC-1</i>                                              | 33359474,33359473               | 69,151  | +2  |                                                 |
| <i>vapBC-2</i>                                              | 18976945,18976946               | 75,133  | -13 |                                                 |
| <i>vapBC-3</i>                                              | 18976948,18976947               | 46,112  | +38 |                                                 |
| <i>vapBC-4</i>                                              | 18977146,18977145               | 102,31  | -28 |                                                 |
| <i>vapBC-5</i>                                              | 768291-768446,18977153          | 52,138  | -1  | New putative <i>vapB</i>                        |
| <i>vapBC-6</i>                                              | 18977147,765885-766256          | 107,124 | +24 | Corrected <i>vapC</i> GI:33359506               |
| <i>vapBC-7</i>                                              | 18977185,18977184               | 76,138  | -4  |                                                 |
| <i>vapBC-8</i>                                              | 18977210,18977211               | 83,126  | -1  |                                                 |
| <i>vapBC-9</i>                                              | -,33359527                      | -,144   | NA  | Solitary <i>vapC</i>                            |
| <i>vapBC-10</i>                                             | -,33359529                      | -,75    | NA  | Solitary <i>vapC</i>                            |
| <i>vapBC-11</i>                                             | 1146253-1146840,18977577        | 196,155 | -13 | New putative <i>vapB</i>                        |
| <i>vapBC-12</i>                                             | 18977579,18977578               | 76,156  | -4  |                                                 |
| <i>vapBC-13</i>                                             | 1159756-1160004,18977595        | 82,123  | -28 | New putative <i>vapB</i>                        |
| <i>vapBC-14</i>                                             | 18977725,18977724               | 73,134  | -14 |                                                 |
| <i>vapBC-15</i>                                             | c1596552-1596223,18978088       | 110,138 | -10 | New putative <i>vapB</i>                        |
| <i>vapBC-16</i>                                             | c1897570-1897358,18978429       | 71,56   | -32 | New putative <i>vapB</i>                        |
| <b><u>Pyrococcus horikoshii</u> 14589963 1,738,505</b>      |                                 |         |     |                                                 |
| <i>relBE-1</i>                                              | 14590323,14590322               | 67,90   | +9  |                                                 |
| <i>relBE-2</i>                                              | -,14590326                      | -,96    | NA  | Solitary <i>relE</i>                            |
| <i>relBE-3</i>                                              | -,928619-928915                 | -,99    | NA  | Solitary <i>relE</i> , corrected<br>GI:33359355 |
| <i>vapBC-1</i>                                              | 33359257,33359258               | 86,150  | -29 |                                                 |
| <i>vapBC-2</i>                                              | c351629-351390,14590297         | 80,134  | -14 | New putative <i>vapB</i>                        |
| <i>vapBC-3</i>                                              | c372554-372781,33359290         | 76,92   | +54 |                                                 |
| <i>vapBC-4</i>                                              | c452910-452704,14590406         | 69,149  | -22 | New putative <i>vapB</i>                        |
| <i>vapBC-5</i>                                              | 631040-631294,14590586          | 85,156  | -29 | New putative <i>vapB</i>                        |
| <i>vapBC-6</i>                                              | c632499-632206,14590587         | 98,161  | -13 | New putative <i>vapB</i>                        |
| <i>vapBC-7</i>                                              | 14590763,33359341               | 74,80   | -10 |                                                 |
| <i>vapBC-8</i>                                              | c821653-821345,14590765         | 103,138 | -1  | New putative <i>vapB</i>                        |
| <i>vapBC-9</i>                                              | c1168172-1168014,14591108       | 54,117  | +30 | New putative <i>vapB</i>                        |
| <i>vapBC-10</i>                                             | 1501435-1501986,14591473        | 184,138 | +43 | New putative <i>vapB</i>                        |
| <i>vapBC-11</i>                                             | 965798-965962,14591761          | 55,111  | +85 | New putative <i>vapB</i>                        |

|                                        |                                   |                           |     |                                                                        |  |
|----------------------------------------|-----------------------------------|---------------------------|-----|------------------------------------------------------------------------|--|
| <b><u>Pyrococcus abyssi</u></b>        |                                   | <b>14518450 1,765,118</b> |     |                                                                        |  |
| <i>relBE-1</i>                         | - ,33356736                       | - ,98                     | NA  | Solitary <i>relE</i>                                                   |  |
| <i>vapBC-1</i>                         | 14520335,14520334                 | 74,128                    | -4  |                                                                        |  |
| <i>vapBC-2</i>                         | 14520620,14520619                 | 79,123                    | -31 |                                                                        |  |
| <i>vapBC-3</i>                         | c447806-448138,33356691           | 111,172                   | -1  | <i>vapB</i> corrected GI:14520682                                      |  |
| <i>vapBC-4</i>                         | 14520978,14520979                 | 75,136                    | -13 |                                                                        |  |
| <i>vapBC-5</i>                         | 761684-761887,14521013            | 68,156                    | -17 | New putative <i>vapB</i>                                               |  |
| <i>vapBC-6</i>                         | 834293-834433,14521081            | 47,96                     | -14 | New putative <i>vapB</i>                                               |  |
| <i>vapBC-7</i>                         | c898293-898093,14521141           | 67,156                    | -8  | New putative <i>vapB</i>                                               |  |
| <i>vapBC-8</i>                         | c1009921-1009637,14521256         | 95,143                    | -29 | New putative <i>vapB</i>                                               |  |
| <i>vapBC-9</i>                         | c1120616-1120338,14521371         | 93,148                    | -13 | New putative <i>vapB</i>                                               |  |
| <i>vapBC-10</i>                        | 14521382,14521383                 | 67,133                    | 0   |                                                                        |  |
| <i>vapBC-11</i>                        | 1136739-1136951,14521385          | 71,169                    | -38 | New putative <i>vapB</i>                                               |  |
| <i>vapBC-12</i>                        | c1153817-1153542,14521399         | 92,110                    | -10 | New putative <i>vapB</i>                                               |  |
| <i>vapBC-13</i>                        | 1260427-1260705,14521500          | 93,133                    | -23 | New putative <i>vapB</i>                                               |  |
| <i>vapBC-14</i>                        | 1291316-1291903,14521536          | 136,161                   | -13 | New putative <i>vapB</i>                                               |  |
| <i>vapBC-15</i>                        | 1501612-1501827,14521742          | 72,149                    | -8  | New putative <i>vapB</i>                                               |  |
| <i>vapBC-16</i>                        | c1699062-1698781,14521921         | 94,136                    | -1  | New putative <i>vapB</i>                                               |  |
| <b><u>Thermoplasma acidophilum</u></b> |                                   | <b>16081186 1,564,906</b> |     |                                                                        |  |
| <i>relBE-1</i>                         | - ,237926-238222                  | - ,99                     | NA  | Solitary <i>relE</i>                                                   |  |
| <i>vapBC-1</i>                         | 38670-38828,16081221              | 54,194                    | +28 | New putative <i>vapB</i>                                               |  |
| <i>vapBC-2</i>                         | 804192-804743,16081834            | 184,120                   | -1  | New putative <i>vapB</i>                                               |  |
| <b><u>Thermoplasma volcanium</u></b>   |                                   | <b>13540831 1,584,804</b> |     |                                                                        |  |
| <i>vapBC-1</i>                         | - ,13540951                       | - ,163                    | NA  | Solitary <i>vapC</i>                                                   |  |
| <i>vapBC-2</i>                         | c886266-885913,13541682           | 118,121                   | +15 | New putative <i>vapB</i>                                               |  |
| <b>Gram positive Bacteria:</b>         |                                   |                           |     |                                                                        |  |
| <b><u>Bifidobacterium longum</u></b>   |                                   | <b>23464628 2,256,646</b> |     |                                                                        |  |
| <i>relBE-1</i>                         | 1284380-1284766,1284736-1284981   | 129,82                    | -31 | New putative <i>relBE</i>                                              |  |
| <i>relBE-2</i>                         | c1638570-1638836,c1638230-1638535 | 83,102                    | +34 | New putative <i>relBE</i>                                              |  |
| <i>higBA-1</i>                         | - ,23465886                       | - ,94                     | NA  | Solitary <i>higB</i>                                                   |  |
| <i>vapBC-1</i>                         | 391430-391864,23464899            | 145,139                   | +12 | New putative <i>vapB</i>                                               |  |
| <i>vapBC-2</i>                         | c1248957-1249274,c1248539-1248970 | 106,144                   | -14 | New putative <i>vapBC</i> . A is a confirmed <i>relB/dinJ</i> homolog! |  |
| <i>vapBC-3</i>                         | 23465958,23465959                 | 120,163                   | 0   |                                                                        |  |
| <b><u>C. glutamicum ATCC 13032</u></b> |                                   | <b>23308765 3,309,401</b> |     |                                                                        |  |
| <i>higBA-1</i>                         | 1085714-1086001,1085499-1085777   | 96,93                     | +62 | RGO, New putative <i>higBA</i>                                         |  |
| <b><u>C. efficiens YS 314</u></b>      |                                   | <b>25026556 3,147,090</b> |     |                                                                        |  |
| <i>higBA-1</i>                         | 25029304,25029303                 | 102,104                   | -4  | RGO                                                                    |  |
| <b><u>M. tuberculosis H37Rv</u></b>    |                                   | <b>15607142 4,411,529</b> |     |                                                                        |  |
| <i>relBE-1</i>                         | 15608387,15608386                 | 89,97                     | -4  |                                                                        |  |
| <i>relBE-2</i>                         | 15610002,15610003                 | 93,87                     | +3  |                                                                        |  |
| <i>relBE-3</i>                         | 15610493,15610494                 | 91,85                     | -4  |                                                                        |  |
| <i>parDE-1</i>                         | 15609097,15609096                 | 83,98                     | -4  |                                                                        |  |
| <i>parDE-2</i>                         | c2402508-2402720,15609279         | 71,105                    | -4  | New putative <i>parD</i>                                               |  |
| <i>higBA-1</i>                         | 15609093,2201741-2202091          | 149,117                   | +41 | RGO, <i>higB</i> corrected (GI 15609092)                               |  |
| <i>vapBC-1</i>                         | 71575-71823,15607207              | 83,133                    | -5  | New putative <i>vapB</i>                                               |  |
| <i>vapBC-2</i>                         | 15607441,15607442                 | 73,141                    | -4  |                                                                        |  |
| <i>vapBC-3</i>                         | 15607690,15607689                 | 88,137                    | -4  |                                                                        |  |
| <i>vapBC-4</i>                         | 15607736,15607735                 | 85,130                    | -4  |                                                                        |  |
| <i>vapBC-5</i>                         | 15607766,15607767                 | 86,135                    | -4  |                                                                        |  |
| <i>vapBC-6</i>                         | 15607797,15607796                 | 51,127                    | +94 |                                                                        |  |
| <i>vapBC-7</i>                         | 15607802,15607801                 | 122,145                   | -4  |                                                                        |  |
| <i>vapBC-8</i>                         | 15607804,15607805                 | 90,112                    | -4  |                                                                        |  |
| <i>vapBC-9</i>                         | 1073325-1073543,15608100          | 73,127                    | -1  | New putative <i>vapB</i>                                               |  |
| <i>vapBC-10</i>                        | 15608536,15608535                 | 85,133                    | -4  |                                                                        |  |
| <i>vapBC-11</i>                        | 15608698,15608699                 | 72,134                    | +5  |                                                                        |  |
| <i>vapBC-12</i>                        | 15608859,15608858                 | 72,129                    | -4  |                                                                        |  |
| <i>vapBC-13</i>                        | 15608976,15608975                 | 87,131                    | -4  |                                                                        |  |
| <i>vapBC-14</i>                        | 15609089,15609090                 | 71,103                    | -4  |                                                                        |  |
| <i>vapBC-15</i>                        | 15609146,15609147                 | 80,132                    | 0   |                                                                        |  |
| <i>vapBC-16</i>                        | c2506381-2506208,c2505735-2506153 | 59,139                    | +56 | New putative <i>vapBC</i>                                              |  |
| <i>vapBC-17</i>                        | 15609663,15609664                 | 75,133                    | -4  |                                                                        |  |



|                                                               |                                   |         |     |                                           |
|---------------------------------------------------------------|-----------------------------------|---------|-----|-------------------------------------------|
| <i>vapBC</i> -18                                              | 15609682,15609683                 | 92,137  | +92 |                                           |
| <i>vapBC</i> -19                                              | 15609684,15609685                 | 85,125  | -4  |                                           |
| <i>vapBC</i> -20                                              | 15609687,15609686                 | 81,131  | -4  |                                           |
| <i>vapBC</i> -21                                              | 15609895,15609894                 | 88,138  | -4  |                                           |
| <i>vapBC</i> -22                                              | 15609967,15609966                 | 71,130  | -4  |                                           |
| <i>vapBC</i> -23                                              | 3174744-3174989,15610000          | 82,126  | -55 | New putative <i>vapB</i>                  |
| <i>mazEF</i> -1                                               | c547345-547515,c547077-547355     | 57,93   | -11 | New putative <i>mazEF</i>                 |
| <i>mazEF</i> -2                                               | 15607800,15607799                 | 81,102  | -14 |                                           |
| <i>mazEF</i> -3                                               | c1231289-1231056,15608242         | 77,103  | -1  | New putative <i>mazE</i>                  |
| <i>mazEF</i> -4                                               | 15608632,15608633                 | 100,105 | -4  |                                           |
| <i>mazEF</i> -5                                               | c2195345-2195109,15609079         | 78,109  | -4  | New putative <i>mazE</i>                  |
| <i>mazEF</i> -6                                               | c2234644-2234919,15609128         | 92,114  | -4  | New putative <i>mazE</i>                  |
| <i>mazEF</i> -7                                               | 2320829-2321059,2321055-2321462   | 77,136  | -5  | New putative <i>mazEF</i>                 |
| <i>mazEF</i> -8                                               | c2547085-2546840,15609411         | 82,105  | +31 | New putative <i>mazE</i>                  |
| <i>mazEF</i> -9                                               | 3110734-3110507,15609938          | 76,118  | -13 | New putative <i>mazE</i>                  |
| <b><u>M. tuberculosis CDC1551 15839372 4,403,836</u></b>      |                                   |         |     |                                           |
| <i>relBE</i> -1                                               | c1388510-1388731,15840691         | 89,97   | -4  | New putative <i>relB</i>                  |
| <i>relBE</i> -2                                               | 3171692-3171970,3171946-3172237   | 93,87   | -25 | New putative <i>relBE</i>                 |
| <i>relBE</i> -3                                               | 15842953,15842954                 | 91,85   | -4  |                                           |
| <i>parDE</i> -1                                               | 15841430,15841429                 | 83,98   | -4  |                                           |
| <i>parDE</i> -2                                               | 15841634,15841633                 | 71,105  | -4  |                                           |
| <i>higBA</i> -1                                               | 15841426,2199074-2199424          | 149,117 | +41 | RGO, <i>higB</i> corrected (GI: 15841425) |
| <i>vapBC</i> -1                                               | 71570-71806,15839444              | 79,133  | -5  | New putative <i>vapB</i>                  |
| <i>vapBC</i> -2                                               | 363888-364106,15839686            | 73,141  | -1  | New putative <i>vapB</i>                  |
| <i>vapBC</i> -3                                               | 15839947,15839946                 | 88,137  | -4  |                                           |
| <i>vapBC</i> -4                                               | 15839999,15839998                 | 85,131  | -7  |                                           |
| <i>vapBC</i> -5                                               | 719471-719728,719728-720132       | 86,135  | -4  | New putative <i>vapBC</i>                 |
| <i>vapBC</i> -6                                               | 15840060,15840059                 | 51,127  | +94 |                                           |
| <i>vapBC</i> -7                                               | 15840065,15840064                 | 126,145 | -4  |                                           |
| <i>vapBC</i> -8                                               | 15840067,15840068                 | 108,112 | -89 |                                           |
| <i>vapBC</i> -9                                               | 15840384,15840385                 | 73,127  | -4  |                                           |
| <i>vapBC</i> -10                                              | 15840856,15840855                 | 89,133  | -4  |                                           |
| <i>vapBC</i> -11                                              | 15841027,15841028                 | 72,134  | +5  |                                           |
| <i>vapBC</i> -12                                              | 15841183,15841182                 | 75,129  | -4  |                                           |
| <i>vapBC</i> -13                                              | 15841307,15841306                 | 87,131  | -4  |                                           |
| <i>vapBC</i> -14                                              | 15841423,15841424                 | 75,103  | -4  |                                           |
| <i>vapBC</i> -15                                              | 15841491,15841492                 | 80,132  | 0   |                                           |
| <i>vapBC</i> -16                                              | c2503593-2503357,15841724         | 79,139  | +69 | New putative <i>vapB</i>                  |
| <i>vapBC</i> -17                                              | 15842060,15842061                 | 75,133  | -4  |                                           |
| <i>vapBC</i> -18                                              | 15842081,15842082                 | 92,138  | +89 |                                           |
| <i>vapBC</i> -19                                              | c2866266-2866541,c2865871-2866266 | 92,132  | -1  | New putative <i>vapBC</i>                 |
| <i>vapBC</i> -20                                              | 15842083,15842084                 | 90,125  | -4  |                                           |
| <i>vapBC</i> -21                                              | 15842296,15842295                 | 88,138  | -4  |                                           |
| <i>vapBC</i> -22                                              | c3131225-3131449,c3130833-3131225 | 79,131  | -1  | New putative <i>vapBC</i>                 |
| <i>vapBC</i> -23                                              | 15842405,15842406                 | 64,126  | -4  |                                           |
| <i>mazEF</i> -1                                               | 15840063,15840062                 | 83,102  | -14 |                                           |
| <i>mazEF</i> -2                                               | 15840542,15840541                 | 78,103  | -1  |                                           |
| <i>mazEF</i> -3                                               | 15840957,15840958                 | 100,105 | -4  |                                           |
| <i>mazEF</i> -4                                               | c2192678-2192442,15841413         | 78,117  | -28 | New putative <i>mazE</i>                  |
| <i>mazEF</i> -5                                               | 15841473,15841472                 | 82,114  | -7  |                                           |
| <i>mazEF</i> -6                                               | c2544045-2544290,c2543694-2544008 | 82,105  | -4  | New putative <i>mazEF</i>                 |
| <i>mazEF</i> -7                                               | 3105455-3105228,15842339          | 76,117  | -11 | New putative <i>mazE</i>                  |
| <b><u>S. avermitilis MA_4680 29826540 9,025,608</u></b>       |                                   |         |     |                                           |
| <i>relBE</i> -1                                               | 29829748,29829747                 | 93,84   | -4  |                                           |
| <i>vapBC</i> -1                                               | 29832236,29832237                 | 77,135  | -4  |                                           |
| <i>mazEF</i> -1                                               | -,29827212                        | -,158   | NA  | Solitary <i>mazF</i>                      |
| <i>phd/doc</i> -1                                             | 29833628,29833629                 | 79,124  | +4  |                                           |
| <i>phd/doc</i> -2                                             | 29827371,29827370                 | 74,125  | -1  |                                           |
| <b><u>S. coelicolor A32 chromosome 32141095 8,667,507</u></b> |                                   |         |     |                                           |
| <i>relBE</i> -1                                               | 21220706,21220707                 | 87,84   | -4  |                                           |
| <i>phd/doc</i> -1                                             | 21218953,21218954                 | 74,127  | -1  |                                           |
| <i>phd/doc</i> -2                                             | 21224247,21224248                 | 64,68   | -4  |                                           |
| <b><u>Chlorobium tepidum TLS 21672841 2,154</u></b>           |                                   |         |     |                                           |
| <i>mazEF</i> -1                                               | 947841-948164,21673827            | 108,107 | -37 | New putative <i>mazE</i>                  |
| <i>phd/doc</i> -1                                             | 21673171,21673172                 | 75,127  | +3  |                                           |

|                                         |                                   |                                  |     |                                               |  |
|-----------------------------------------|-----------------------------------|----------------------------------|-----|-----------------------------------------------|--|
| <b><u>Nostoc_sp_PCC_7120</u></b>        |                                   | <b><u>17227497 6,413,771</u></b> |     |                                               |  |
| <i>relBE-1</i>                          | c181989-181630,17227667           | 119,81                           | -14 | New putative <i>relE</i>                      |  |
| <i>relBE-2</i>                          | -,17228895                        | -,80                             | NA  | Solitary <i>relE</i>                          |  |
| <i>relBE-3</i>                          | 17229593,17229592                 | 84,91                            | -8  |                                               |  |
| <i>relBE-4</i>                          | 17231900,17231899                 | 104,127                          | -32 |                                               |  |
| <i>relBE-5</i>                          | 17231962,17231963                 | 76,94                            | -23 |                                               |  |
| <i>relBE-6</i>                          | 17232054,17232053                 | 70,87                            | -4  |                                               |  |
| <i>higBA-1</i>                          | 17228529,17228529                 | 108,123                          | -4  | RGO                                           |  |
| <i>higBA-2</i>                          | 17229893,17229894                 | 98,112                           | -11 | RGO                                           |  |
| <i>higBA-3</i>                          | 17230415,17230416                 | 97,99                            | -13 | RGO                                           |  |
| <i>vapBC-1</i>                          | 17227644,17227645                 | 81,128                           | -4  |                                               |  |
| <i>vapBC-2</i>                          | 17227999,17228000                 | 66,155                           | -17 |                                               |  |
| <i>vapBC-3</i>                          | 17228249,17228248                 | 127,131                          | -4  |                                               |  |
| <i>vapBC-4</i>                          | 17228989,17228988                 | 69,129                           | -11 |                                               |  |
| <i>vapBC-5</i>                          | 17229689,17229688                 | 78,132                           | -14 |                                               |  |
| <i>vapBC-6</i>                          | 17230178,17230177                 | 78,129                           | -4  |                                               |  |
| <i>vapBC-7</i>                          | c3788612-3788415,17230620         | 66,90                            | -16 | New putative <i>vapB</i>                      |  |
| <i>vapBC-8</i>                          | 17230960,17230961                 | 83,128                           | -4  |                                               |  |
| <i>vapBC-9</i>                          | 17230970,17230971                 | 89,149                           | -1  |                                               |  |
| <i>vapBC-10</i>                         | 17231113,17231114                 | 74,140                           | -17 |                                               |  |
| <i>vapBC-11</i>                         | 17231465,17231464                 | 73,133                           | -13 |                                               |  |
| <i>vapBC-12</i>                         | 17231628,17231627                 | 75,128                           | -4  |                                               |  |
| <i>vapBC-13</i>                         | 17232092,5499145-5499573          | 96,143                           | -1  | <i>vapC</i> corrected (GI:17232093)           |  |
| <i>vapBC-14</i>                         | 17232625,17232624                 | 102,147                          | -20 |                                               |  |
| <i>mazEF-1</i>                          | 17227834,17227833                 | 61,121                           | -20 |                                               |  |
| <i>mazEF-2</i>                          | 17228252,17228253                 | 69,113                           | -14 |                                               |  |
| <i>mazEF-3</i>                          | -,17230498                        | -,88                             | NA  | Solitary <i>vapC</i>                          |  |
| <i>mazEF-4</i>                          | 17230704,17230703                 | 80,146                           | -1  |                                               |  |
| <i>mazEF-5</i>                          | 17232412,17232413                 | 80,115                           | +5  |                                               |  |
| <i>phd/doc-1</i>                        | 17227997,17227998                 | 136,151                          | +72 |                                               |  |
| <b><u>Synechocystis_PCC6803</u></b>     |                                   | <b><u>16329170 3,573,470</u></b> |     |                                               |  |
| <i>relBE-1</i>                          | 16330633,1620536-1620793          | 87,86                            | -1  | New putative <i>relE</i> ( <i>yefM/yoeB</i> ) |  |
| <i>relBE-2</i>                          | 16331058,2074933-2075211          | 87,93                            | -22 | New putative <i>relE</i> ( <i>yefM/yoeB</i> ) |  |
| <i>relBE-3</i>                          | 16332147,16332148                 | 86,120                           | -11 |                                               |  |
| <i>higBA-1</i>                          | c474208-474432,c474514-474792     | 75,93                            | +82 | RGO, new putative <i>higAB</i>                |  |
| <i>vapBC-1</i>                          | 16329605,16329604                 | 75,83                            | 0   |                                               |  |
| <i>vapBC-2</i>                          | 16330048,16330047                 | 133,157                          | -68 |                                               |  |
| <i>vapBC-3</i>                          | 16330685,16330684                 | 84,149                           | +9  |                                               |  |
| <i>vapBC-4</i>                          | 16330930,16330929                 | 68,128                           | -1  |                                               |  |
| <i>vapBC-5</i>                          | -,16331065                        | -,61                             | NA  | Solitary <i>vapC</i>                          |  |
| <i>vapBC-6</i>                          | c2516782-2516531,16331422         | 84,125                           | +3  | New putative <i>vapB</i>                      |  |
| <i>vapBC-7</i>                          | 16331533,16331532                 | 85,133                           | +2  |                                               |  |
| <i>vapBC-8</i>                          | c3044422-3044670,c3044058-3044501 | 83,148                           | -79 | New putative <i>vapC</i>                      |  |
| <i>vapBC-9</i>                          | 16332080,16332079                 | 92,131                           | +11 |                                               |  |
| <i>mazEF-1</i>                          | 16330121,16330120                 | 88,115                           | -4  |                                               |  |
| <b><u>Bacillus_anthraxis_Ames</u></b>   |                                   | <b><u>30260195 5,227,293</u></b> |     |                                               |  |
| <i>mazEF-1</i>                          | 30260429,30260430                 | 95,116                           | +4  |                                               |  |
| <b><u>Bacillus_cereus_ATCC14579</u></b> |                                   | <b><u>30018278 5,411,809</u></b> |     |                                               |  |
| <i>mazEF-1</i>                          | 30018502,30018503                 | 95,116                           | +4  |                                               |  |
| <b><u>Bacillus_halodurans</u></b>       |                                   | <b><u>15612563 4,202,353</u></b> |     |                                               |  |
| <i>mazEF-1</i>                          | 15613084,15613085                 | 95,116                           | +3  |                                               |  |
| <i>mazEF-2</i>                          | 15616282,15616283                 | 81,109                           | 0   |                                               |  |
| <b><u>Bacillus_subtilis</u></b>         |                                   | <b><u>16077068 4,214,814</u></b> |     |                                               |  |
| <i>mazEF-1</i>                          | 16077532,16077533                 | 93,116                           | +4  |                                               |  |
| <b><u>C._acetobutylicum_ATCC824</u></b> |                                   | <b><u>15893298 3,940,880</u></b> |     |                                               |  |
| <i>mazEF-1</i>                          | 15893784,15893785                 | 106,122                          | -41 |                                               |  |
| <i>mazEF-2</i>                          | -,15893379                        | -,199                            | NA  | Solitary <i>mazE</i> , annotated              |  |
| <b><u>Clostridium_perfringens</u></b>   |                                   | <b><u>18308982 3,031,430</u></b> |     |                                               |  |
| <i>mazEF-1</i>                          | 18309276,18309277                 | 80,117                           | +5  |                                               |  |
| <i>phd/doc-1</i>                        | -,18309825                        | -,137                            | NA  | Solitary <i>doc</i>                           |  |
| <b><u>Clostridium_tetani_E88</u></b>    |                                   | <b><u>28209834 2,799,251</u></b> |     |                                               |  |
| <i>mazEF-1</i>                          | c2670080-2670397,c2669764-2670117 | 116,118                          | -37 | New putative <i>mazEF</i>                     |  |
| <i>phd/doc-1</i>                        | c2057481-2057179,28211562         | 101,127                          | -1  | New putative <i>phd</i>                       |  |

|                                             |                        |                 |                  |                                              |  |
|---------------------------------------------|------------------------|-----------------|------------------|----------------------------------------------|--|
| <b><u>Enterococcus faecalis V583</u></b>    |                        | <b>29374661</b> | <b>3,218,031</b> |                                              |  |
| <i>relBE-1</i>                              | 29375140,29375141      | 88,91           | -8               |                                              |  |
| <i>mazEF-1</i>                              | -,29375414             | -,113           | NA               | Solitary <i>mazF</i>                         |  |
| <i>mazEF-2</i>                              | -,29375438             | -,125           | NA               | Solitary <i>mazF</i>                         |  |
| <i>mazEF-3</i>                              | 29377704,29377705      | 76,121          | -11              |                                              |  |
| <i>phd/doc-1</i>                            | 29375017,29375016      | 79,139          | -4               |                                              |  |
| <b><u>Lactobacillus plantarum</u></b>       |                        | <b>28376974</b> | <b>3,308,274</b> |                                              |  |
| <i>higBA-1</i>                              | 28377334,28377333      | 97,75           | +11              | RGO                                          |  |
| <i>mazEF-1</i>                              | -,28377410             | -,130           | NA               | Solitary <i>mazF</i>                         |  |
| <i>mazEF-2</i>                              | 28379347,28379346      | 82,115          | -1               |                                              |  |
| <b><u>Listeria innocua</u></b>              |                        | <b>16799079</b> | <b>3,011,208</b> |                                              |  |
| <i>mazEF-1</i>                              | 16799959,16799960      | 92,115          | +3               |                                              |  |
| <b><u>Listeria monocytogenes</u></b>        |                        | <b>16802048</b> | <b>2,944,528</b> |                                              |  |
| <i>mazEF-1</i>                              | 16802928,16802929      | 92,115          | +3               |                                              |  |
| <b><u>Oceanobacillus iheyensis</u></b>      |                        | <b>23097455</b> | <b>3,630,528</b> |                                              |  |
| <i>mazEF-1</i>                              | 23098077,23098078      | 94,119          | +4               |                                              |  |
| <b><u>T. tengcongensis</u></b>              |                        | <b>20806542</b> | <b>2,689,445</b> |                                              |  |
| <i>relBE-1</i>                              | 867887-868186,20807340 | 99,87           | +1               | New putative <i>relB</i>                     |  |
| <i>relBE-2</i>                              | 20808432,20808431      | 79,92           | -26              |                                              |  |
| <i>relBE-3</i>                              | 20808957,20808956      | 91,86           | -11              |                                              |  |
| <i>vapBC-1</i>                              | 20807534,20807535      | 83,137          | -17              |                                              |  |
| <i>vapBC-2</i>                              | 20808932,20808933      | 88,146          | -23              |                                              |  |
| <i>mazEF-1</i>                              | 20808551,20808550      | 91,118          | -4               |                                              |  |
| <b><u>S. aureus MW2</u></b>                 |                        | <b>21281729</b> | <b>2,820,462</b> |                                              |  |
| <i>relBE-1</i>                              | 21284059,21284058      | 83,88           | -1               |                                              |  |
| <i>relBE-2</i>                              | 21284110,21284109      | 85,88           | -1               |                                              |  |
| <i>mazEF-1</i>                              | 21283722,21283721      | 56,120          | -4               |                                              |  |
| <b><u>S. aureus N315</u></b>                |                        | <b>29165615</b> | <b>2,814,816</b> |                                              |  |
| <i>relBE-1</i>                              | 15927986,15927985      | 83,88           | -1               |                                              |  |
| <i>relBE-2</i>                              | 15928036,15928035      | 85,88           | -1               |                                              |  |
| <i>mazEF-1</i>                              | 15927644,15927643      | 56,120          | -4               |                                              |  |
| <b><u>S. aureus Mu50</u></b>                |                        | <b>15922990</b> | <b>2,878,040</b> |                                              |  |
| <i>relBE-1</i>                              | 15925398,15925397      | 83,88           | -1               |                                              |  |
| <i>relBE-2</i>                              | 15925447,15925446      | 85,88           | -1               |                                              |  |
| <i>mazEF-1</i>                              | 15925059,15925058      | 56,120          | -4               |                                              |  |
| <b><u>S. epidermidis ATCC 12228</u></b>     |                        | <b>27466918</b> | <b>2,499,279</b> |                                              |  |
| <i>mazEF-1</i>                              | 27468591,27468590      | 56,120          | -4               |                                              |  |
| <b><u>S. agalactiae 2603</u></b>            |                        | <b>22536185</b> | <b>2,160,267</b> |                                              |  |
| <i>relBE-1</i>                              | 22538144,22538143      | 88,84           | -8               |                                              |  |
| <i>parDE-1</i>                              | 22536413,22536412      | 95,111          | -11              |                                              |  |
| <b><u>S. agalactiae NEM316</u></b>          |                        | <b>25010075</b> | <b>2,211,485</b> |                                              |  |
| <i>relBE-1</i>                              | 25010542,25010543      | 97,112          | -4               |                                              |  |
| <i>parDE-1</i>                              | 25010297,25010296      | 95,111          | -11              |                                              |  |
| <b><u>Streptococcus mutans UA159</u></b>    |                        | <b>24378532</b> | <b>2,030,921</b> |                                              |  |
| <i>relBE-1</i>                              | -,44407-44676          | -,90            | NA               | Solitary <i>relE</i> ; Corrected GI:24378568 |  |
| <i>relBE-2</i>                              | 24379347,24379348      | 90,92           | -14              |                                              |  |
| <i>mazEF-1</i>                              | 24378686,24378687      | 81,110          | -7               |                                              |  |
| <b><u>Streptococcus pneumonia TIGR4</u></b> |                        | <b>15899949</b> | <b>2,160,837</b> |                                              |  |
| <i>relBE-1</i>                              | 15900209,15900210      | 87,92           | -8               |                                              |  |
| <i>relBE-2</i>                              | 15901086,15901085      | 100,84          | +1               |                                              |  |
| <i>relBE-3</i>                              | 15901573,15901572      | 84,84           | +3               |                                              |  |
| <i>higBA-1</i>                              | 15901010,15901009      | 97,121          | -11              | RGO                                          |  |
| <i>phd/doc-1</i>                            | 15900771,15900772      | 78,137          | -4               |                                              |  |
| <b><u>Streptococcus pneumonia R6</u></b>    |                        | <b>15902044</b> | <b>2,038,615</b> |                                              |  |
| <i>relBE-1</i>                              | 15902296,15902297      | 87,92           | -8               |                                              |  |

|                                                                   |                             |         |     |                                                        |
|-------------------------------------------------------------------|-----------------------------|---------|-----|--------------------------------------------------------|
| <i>relBE-2</i>                                                    | 15903147,15903146           | 100,87  | -8  |                                                        |
| <i>relBE-3</i>                                                    | 15903628,15903627           | 97,84   | +3  |                                                        |
| <b><u>Streptococcus pyogenes 15674250 1,852,441</u></b>           |                             |         |     |                                                        |
| <i>parDE-1</i>                                                    | 448399-448676,15674649      | 95,107  | -4  | New putative <i>parD</i> , also related to <i>relE</i> |
| <i>parDE-2</i>                                                    | 15675733,15675734           | 95,111  | -11 |                                                        |
| <b><u>S. pyogenes MGAS315 21909536 1,900,521</u></b>              |                             |         |     |                                                        |
| <i>parDE-1</i>                                                    | 21909929,21909930           | 100,101 | -1  | Also related to <i>relE</i>                            |
| <i>parDE-2</i>                                                    | 21911197,21911198           | 95,111  | -11 |                                                        |
| <b><u>S. pyogenes MGAS8232 19745201 1,895,017</u></b>             |                             |         |     |                                                        |
| <i>parDE-1</i>                                                    | 19745671,19745672           | 100,101 | -1  | Also related to <i>relE</i>                            |
| <i>parDE-2</i>                                                    | 19746843,19746844           | 95,111  | -11 |                                                        |
| <b><u>Streptococcus pyogenes SSI_1 28894912 1,894,275</u></b>     |                             |         |     |                                                        |
| <i>parDE-1</i>                                                    | 28896373,28896372           | 100,101 | -1  | Also related to <i>relE</i>                            |
| <i>parDE-2</i>                                                    | 28896571,28896572           | 95,113  | -17 |                                                        |
| <b><u>Fusobacterium nucleatum 19703352 2,174,500</u></b>          |                             |         |     |                                                        |
| <i>relBE-1</i>                                                    | 19703555,19703556           | 72,88   | +7  |                                                        |
| <i>relBE-2</i>                                                    | 19703831,19703832           | 73,90   | +1  |                                                        |
| <i>relBE-3</i>                                                    | 19704434,19704435           | 75,88   | -16 |                                                        |
| <b><u>Pirellula sp 32470666 7,145,576</u></b>                     |                             |         |     |                                                        |
| <i>relBE-1</i>                                                    | 32472872,32472873           | 89,154  | +27 |                                                        |
| <i>parDE-1</i>                                                    | 32473225,32473226           | 85,96   | -4  |                                                        |
| <i>parDE-2</i>                                                    | 32476300,32476299           | 93,103  | -4  |                                                        |
| <b><u>Others</u></b>                                              |                             |         |     |                                                        |
| <b><u>Aquifex aeolicus 15282445 1,551,335</u></b>                 |                             |         |     |                                                        |
| <i>vapBC-1</i>                                                    | 203338-203605,203579-203860 | 88,94   | -26 | New putative <i>vapBC</i>                              |
| <i>vapBC-2</i>                                                    | 1338522-1338839,15606926    | 106,135 | +12 | New putative <i>vapB</i>                               |
| <b><u>Bacteroides theta_VPI_5482 29345410 6,260,361</u></b>       |                             |         |     |                                                        |
| <i>higBA-1</i>                                                    | 29349640,5572334-5572546    | 64,71   | -23 | RGO, new putative <i>higA</i>                          |
| <i>higBA-2</i>                                                    | 29350141,29350140           | 101,110 | -20 | RGO                                                    |
| <b><u>Gram-negative Bacteria</u></b>                              |                             |         |     |                                                        |
| <b><u>Caulobacter crescentus 16124256 4,016,947</u></b>           |                             |         |     |                                                        |
| <i>relBE-1</i>                                                    | 16125056,16125055           | 87,93   | -4  |                                                        |
| <i>relBE-2</i>                                                    | 16126753,16126752           | 66,88   | -13 |                                                        |
| <i>relBE-3</i>                                                    | 3102767-3103121,16127112    | 96,92   | -4  | New putative <i>relB</i>                               |
| <i>relBE-4</i>                                                    | 3371212-3371388,16127361    | 59,107  | -58 | New putative <i>relB</i>                               |
| <i>parDE-1</i>                                                    | 16125127,16125126           | 88,96   | -4  |                                                        |
| <i>parDE-2</i>                                                    | 16125306,1186395-1186610    | 95,72   | -8  | New putative <i>parE</i>                               |
| <i>parDE-3</i>                                                    | c2971288-2971506,16126988   | 73,100  | +15 | New putative <i>parD</i>                               |
| <i>parDE-4</i>                                                    | 16127215,16127214           | 96,100  | -20 |                                                        |
| <i>higBA-1</i>                                                    | 16127267,16127268           | 108,65  | -7  | RGO                                                    |
| <i>vapBC-1</i>                                                    | 16124288,16124287           | 79,128  | 0   |                                                        |
| <i>phd/doc-1</i>                                                  | c3613552-3613915,16127593   | 121,130 | -1  | New putative <i>phd</i>                                |
| <b><u>A. tumefaciens C58 Cereon_circ 15887359 2,841,581</u></b>   |                             |         |     |                                                        |
| <i>relBE-1</i>                                                    | 15888018,15888017           | 75,89   | -17 |                                                        |
| <i>relBE-2</i>                                                    | 15888153,15888152           | 93,103  | -11 |                                                        |
| <i>relBE-3</i>                                                    | c831117-830842,15888171     | 91,99   | +4  | <i>relB</i> corrected (GI:15888172)                    |
| <i>relBE-4</i>                                                    | 15888274,15888273           | 91,111  | +4  |                                                        |
| <i>relBE-5</i>                                                    | c1769363-1769118,15889086   | 81,96   | -4  | <i>relB</i> corrected (GI:15888087)                    |
| <i>relBE-6</i>                                                    | c1979782-1979531,15889305   | 83,89   | -4  | <i>relB</i> corrected (GI:15888306)                    |
| <i>parDE-1</i>                                                    | 15888422,c1070511-1070861   | 89,117  | -44 | New putative <i>parE</i> (corrected GI:15888421)       |
| <i>parDE-2</i>                                                    | 1304512-1304808,15888638    | 98,124  | -4  | <i>parD</i> corrected (GI:15888637)                    |
| <i>parDE-3</i>                                                    | 15888836,15888835           | 88,99   | -17 |                                                        |
| <i>vapBC-1</i>                                                    | 15888348,c1001393-1001007   | 90,129  | -1  | <i>vapC</i> corrected(GI:15888347)                     |
| <i>vapBC-2</i>                                                    | 15889422,15889421           | 142,148 | -38 |                                                        |
| <i>mazEF-1</i>                                                    | 928764-929030,15888280      | 88,120  | -4  | <i>mazE</i> corrected (GI:15888281)                    |
| <b><u>A. tumefaciens C58 Cereon_linear 15890089 2,074,782</u></b> |                             |         |     |                                                        |

|                                                              |                                 |         |     |                                             |
|--------------------------------------------------------------|---------------------------------|---------|-----|---------------------------------------------|
| <i>relBE</i> -1                                              | 15890524,15890523               | 78,95   | +5  |                                             |
| <i>vapBC</i> -1                                              | 15891912,15891913               | 87,134  | -4  |                                             |
| <b><u>A. tumef. C58 Washn cir chr 17933925 2,841,490</u></b> |                                 |         |     |                                             |
| <i>relBE</i> -1                                              | 17934585,17934584               | 75,89   | -17 |                                             |
| <i>relBE</i> -2                                              | 17934719,c809573-809884         | 93,104  | -5  | <i>relE</i> corrected (GI:17934718)         |
| <i>relBE</i> -3                                              | 17934843,17934842               | 91,99   | +32 |                                             |
| <i>relBE</i> -4                                              | 17934986,17934985               | 89,103  | -5  |                                             |
| <i>relBE</i> -5                                              | 17935676,17935675               | 81,96   | -4  |                                             |
| <i>relBE</i> -6                                              | 17935904,17935903               | 84,89   | -4  |                                             |
| <i>parDE</i> -1                                              | c830914-831318,c830618-830914   | 135,99  | -1  | New putative <i>parDE</i>                   |
| <i>parDE</i> -2                                              | 1304610-1304918,1304918-1305289 | 103,124 | -1  | New putative <i>parDE</i>                   |
| <i>parDE</i> -3                                              | 17935410,17935409               | 88,91   | +7  |                                             |
| <i>vapBC</i> -1                                              | 17934913,17934912               | 76,129  | -4  |                                             |
| <i>vapBC</i> -2                                              | 17936025,c2105391-2105804       | 140,138 | -8  | Start of <i>vapC</i> corrected, GI:17936024 |
| <i>mazEF</i> -1                                              | 17934847,17934848               | 88,119  | -1  |                                             |
| <b><u>A. tumef. C58 Washn lin chr 17936711 2,075,560</u></b> |                                 |         |     |                                             |
| <i>relBE</i> -1                                              | 17938149,17938150               | 74,95   | +5  |                                             |
| <i>vapBC</i> -1                                              | 17936725,17936724               | 87,134  | -4  |                                             |
| <b><u>Bradyrhizobium japonicum 27375111 9,105,82</u></b>     |                                 |         |     |                                             |
| <i>higBA</i> -1                                              | 1797159-1797353,1796750-1797079 | 65,110  | +79 | RGO                                         |
| <i>higBA</i> -2                                              | 27377225,2290771-2291367        | 106,124 | -4  | RGO, corrected (GI:27377224)                |
| <i>higBA</i> -3                                              | 27378122,27378123               | 102,93  | +13 | RGO                                         |
| <i>higBA</i> -4                                              | 5539812-5540207,27380106        | 132,100 | -11 | RGO, new putative <i>higA</i>               |
| <i>vapBC</i> -1                                              | 27377546,27377545               | 94,141  | -4  |                                             |
| <b><u>Brucella melitensis chr I 17986284 2,117,144</u></b>   |                                 |         |     |                                             |
| <i>relBE</i> -1                                              | 17987808,17987809               | 86,105  | -4  |                                             |
| <i>phd/doc</i> -1                                            | 17987658,17987659               | 76,129  | -4  |                                             |
| <b><u>Brucella melitensis chr II 17988344 1,177,787</u></b>  |                                 |         |     |                                             |
| <i>mazEF</i> -1                                              | 197880-198089,17988530          | 70,94   | -1  | New putative <i>mazE</i>                    |
| <b><u>Brucella suis chromosome I 23500916 2,107,792</u></b>  |                                 |         |     |                                             |
| <i>relBE</i> -1                                              | 23501312,23501311               | 86,105  | -4  |                                             |
| <i>phd/doc</i> -1                                            | 23501447,23501446               | 76,129  | -4  |                                             |
| <b><u>Brucella suis chromosome II 23499767 1,207,381</u></b> |                                 |         |     |                                             |
| <i>mazEF</i> -1                                              | c1101320-1101529,23500829       | 70,94   | -1  | New putative <i>mazE</i>                    |
| <b><u>Mesorhizobium loti 13470324 7,036,074</u></b>          |                                 |         |     |                                             |
| <i>relBE</i> -1                                              | 250975-251220,251223-251513     | 81,97   | +2  | New putative <i>relBE</i>                   |
| <i>parDE</i> -1                                              | 13471354,13471355               | 81,98   | -1  |                                             |
| <i>parDE</i> -2                                              | 1972578-1972823,1972805-1973119 | 82,105  | -19 | New putative <i>parDE</i>                   |
| <i>parDE</i> -3                                              | 13472960,13472959               | 88,94   | +30 |                                             |
| <i>higBA</i> -1                                              | 13471567,13471566               | 102,98  | +8  | RGO                                         |
| <i>higBA</i> -2                                              | 4800860-4801012,4800572-4800853 | 51,94   | +6  | RGO                                         |
| <i>vapBC</i> -1                                              | 13471641,13471640               | 91,132  | -1  |                                             |
| <i>vapBC</i> -2                                              | 13473341,13473340               | 89,139  | -23 |                                             |
| <i>vapBC</i> -3                                              | 13474236,13474235               | 98,137  | -4  |                                             |
| <i>vapBC</i> -4                                              | 13474916,13474917               | 99,129  | -4  |                                             |
| <b><u>S. meliloti 1021 chr. 15963753 3,654,135</u></b>       |                                 |         |     |                                             |
| <i>relBE</i> -1                                              | 1588987-1588739,15965227        | 83,92   | +6  | New putative <i>relB</i>                    |
| <i>relBE</i> -2                                              | 15966432,15966431               | 91,100  | -4  |                                             |
| <i>higBA</i> -1                                              | 15964803,15964804               | 102,98  | +15 | RGO                                         |
| <i>higBA</i> -2                                              | 15965582,15965582               | 204,196 | +68 | RGO                                         |
| <i>higBA</i> -3                                              | 15966811,15966812               | 88,92   | +9  | RGO                                         |
| <i>vapBC</i> -1                                              | 15964819,15964820               | 77,94   | -4  |                                             |
| <i>vapBC</i> -2                                              | 15965038,15965037               | 71,121  | -7  |                                             |
| <i>vapBC</i> -3                                              | 15965370,15965369               | 79,132  | -4  |                                             |
| <i>vapBC</i> -4                                              | 15966170,15966171               | 90,134  | -4  |                                             |
| <i>vapBC</i> -5                                              | 15966439,15966438               | 77,132  | -1  |                                             |
| <i>vapBC</i> -6                                              | 15966710,15966709               | 81,153  | -4  |                                             |
| <i>vapBC</i> -7                                              | 15967067,15967066               | 86,134  | -4  |                                             |
| <b><u>Rickettsia conorii Malish 15891923 1,268,755</u></b>   |                                 |         |     |                                             |
| <i>relBE</i> -1                                              | 15892213,15892214               | 102,86  | +10 |                                             |

|                                                               |                                   |         |     |                                                                       |
|---------------------------------------------------------------|-----------------------------------|---------|-----|-----------------------------------------------------------------------|
| <i>higBA</i> -1                                               | 15893146,15893145                 | 142,78  | +49 | RGO, <i>higB</i> followed by 4 stop codons                            |
| <i>vapBC</i> -1                                               | 15892303,15892302                 | 99,134  | -10 |                                                                       |
| <i>vapBC</i> -2                                               | 15892524,15892523                 | 83,139  | -44 |                                                                       |
| <i>vapBC</i> -3                                               | 15893242,15893241                 | 81,135  | -4  |                                                                       |
| <i>mazEF</i> -1                                               | 15891930,15891929                 | 93,80   | +21 |                                                                       |
| <i>mazEF</i> -2                                               | -,15893066                        | -,67    | NA  | Solitary <i>mazF</i>                                                  |
| <b><u>Coxiella burnetii</u> 29732244 1,995,275</b>            |                                   |         |     |                                                                       |
| <i>relBE</i> -1                                               | 29655274,29655275                 | 84,91   | -1  |                                                                       |
| <i>parDE</i> -1                                               | 29653983,29653982                 | 87,112  | +5  |                                                                       |
| <i>higBA</i> -1                                               | 29653637,29653636                 | 106,75  | +3  | RGO                                                                   |
| <i>higBA</i> -2                                               | 29654781,29654782                 | 101,105 | +21 | RGO                                                                   |
| <i>higBA</i> -3                                               | 29654981,29654981                 | 108,56  | -8  | RGO                                                                   |
| <i>vapBC</i> -1                                               | 29654541,29654540                 | 84,128  | +8  |                                                                       |
| <i>vapBC</i> -2                                               | 29654595,29654594                 | 109,125 | -11 |                                                                       |
| <b><u>Ralstonia solanacearum chr.</u> 17544719 3,716,413</b>  |                                   |         |     |                                                                       |
| <i>relBE</i> -1                                               | 17547944,17547943                 | 88,99   | -1  |                                                                       |
| <i>relBE</i> -2                                               | 17547995,17547996                 | 110,86  | -23 |                                                                       |
| <i>vapBC</i> -1                                               | 17545591,17545590                 | 83,137  | -4  |                                                                       |
| <i>vapBC</i> -2                                               | 17547775,17547774                 | 77,137  | -14 |                                                                       |
| <b><u>Neisseria meningitidis MC58</u> 15675948 2,272,351</b>  |                                   |         |     |                                                                       |
| <i>vapBC</i> -1                                               | 15677515,15677514                 | 82,128  | -4  |                                                                       |
| <i>mazEF</i> -1                                               | 15676809,15676808                 | 78,115  | +1  |                                                                       |
| <i>mazEF</i> -2                                               | 15677860,15677861                 | 79,107  | -13 |                                                                       |
| <i>phd/doc</i> -1                                             | c929475-929630,15676812           | 52,122  | -1  | New putative <i>doc</i>                                               |
| <b><u>Neisseria meningitidis Z2491</u> 15793034 2,184,406</b> |                                   |         |     |                                                                       |
| <i>mazEF</i> -1                                               | 15793408,15793407                 | 79,105  | -7  |                                                                       |
| <b><u>Nitrosomonas europaea</u> 30248031 2,812,094</b>        |                                   |         |     |                                                                       |
| <i>relBE</i> -1                                               | 30248490,30248491                 | 73,84   | -23 |                                                                       |
| <i>relBE</i> -2                                               | 30248712,30248711                 | 91,111  | -1  |                                                                       |
| <i>relBE</i> -3                                               | 30248721,30248722                 | 98,84   | -4  |                                                                       |
| <i>relBE</i> -4                                               | -,30249083                        | -,88    | NA  | Solitary <i>relE</i>                                                  |
| <i>relBE</i> -5                                               | 30249325,30249324                 | 102,86  | +2  |                                                                       |
| <i>relBE</i> -6                                               | c1478798-1479043,30249331         | 82,86   | -4  | New putative <i>relB</i>                                              |
| <i>relBE</i> -7                                               | 30249531,30249532                 | 83,96   | -11 |                                                                       |
| <i>relBE</i> -8                                               | 30249547,30249546                 | 93,98   | -4  |                                                                       |
| <i>relBE</i> -9                                               | 30249552,30249553                 | 82,98   | -11 |                                                                       |
| <i>relBE</i> -10                                              | 30249567,30249568                 | 85,91   | +3  |                                                                       |
| <i>parDE</i> -1                                               | 30248282,30248281                 | 80,97   | 0   |                                                                       |
| <i>parDE</i> -2                                               | 30248566,30248567                 | 95,96   | -4  |                                                                       |
| <i>parDE</i> -3                                               | 1479335-1479618,30249332          | 88,99   | -1  | New putative <i>parD</i>                                              |
| <i>parDE</i> -4                                               | 1655892-1656143,30249495          | 83,73   | +3  | New putative <i>parD</i>                                              |
| <i>parDE</i> -5                                               | 30249561,30249560                 | 80,98   | -4  |                                                                       |
| <i>parDE</i> -6                                               | 30250055,30250054                 | 81,114  | -4  |                                                                       |
| <i>higBA</i> -1                                               | 30248496,30248497                 | 101,95  | +9  | RGO                                                                   |
| <i>higBA</i> -2                                               | 30248505,30248506                 | 105,107 | +12 | RGO                                                                   |
| <i>higBA</i> -3                                               | c1156304-1156630,c1156617-1156871 | 109,85  | -14 | RGO, new putative <i>higBA</i> .<br>Toxin hits into <i>relE</i> group |
| <i>higBA</i> -4                                               | 30249099,30249098                 | 118,93  | +12 | RGO                                                                   |
| <i>higBA</i> -5                                               | 30249283,30249284                 | 100,92  | +12 | RGO                                                                   |
| <i>higBA</i> -6                                               | 30249334,30249335                 | 106,111 | -8  | RGO                                                                   |
| <i>higBA</i> -7                                               | 30249348,30249347                 | 92,70   | -17 | RGO                                                                   |
| <i>vapBC</i> -1                                               | c316448-316260,30248306           | 63,134  | -1  |                                                                       |
| <i>vapBC</i> -2                                               | 30248493,30248494                 | 77,133  | -1  |                                                                       |
| <i>vapBC</i> -3                                               | 30248512,30248513                 | 87,136  | -4  |                                                                       |
| <i>vapBC</i> -4                                               | -,30248568                        | -,138   | NA  | Solitary <i>vapC</i>                                                  |
| <i>vapBC</i> -5                                               | 30249061,30249060                 | 82,143  | -4  |                                                                       |
| <i>vapBC</i> -6                                               | 1155550-1155774,30249063          | 75,87   | +33 | New putative <i>vapB</i>                                              |
| <i>vapBC</i> -7                                               | 30249207,30249208                 | 87,157  | -20 |                                                                       |
| <i>vapBC</i> -8                                               | 30249329,30249328                 | 81,131  | +7  |                                                                       |
| <i>vapBC</i> -9                                               | 30249350,30249349                 | 77,134  | -14 |                                                                       |
| <i>vapBC</i> -10                                              | 30249551,30249550                 | 84,142  | -4  |                                                                       |
| <i>vapBC</i> -11                                              | 30249559,30249558                 | 100,135 | -4  |                                                                       |
| <i>vapBC</i> -12                                              | 30250051,30250052                 | 85,138  | +5  |                                                                       |
| <i>vapBC</i> -13                                              | 2296994-2297218,30250053          | 75,131  | -1  | New putative <i>vapB</i>                                              |
| <i>vapBC</i> -14                                              | 30250109,30250108                 | 79,110  | -14 |                                                                       |

|                                                             |                           |        |      |                                                             |
|-------------------------------------------------------------|---------------------------|--------|------|-------------------------------------------------------------|
| <i>mazEF</i> -1                                             | c1002703-1002936,30248925 | 78,116 | -23  | New putative <i>mazE</i>                                    |
| <i>mazEF</i> -2                                             | 30248978,30248977         | 81,115 | -1   |                                                             |
| <i>mazEF</i> -3                                             | 30249168,30249167         | 80,113 | -8   |                                                             |
| <i>mazEF</i> -4                                             | c1427432-1427208,30249285 | 74,108 | -4   | <i>mazE</i> with corrected start (GI:30249286)              |
| <i>mazEF</i> -5                                             | 30249549,30249548         | 80,112 | -16  |                                                             |
| <i>phd/doc</i> -1                                           | c1386501-1386749,30249247 | 83,129 | -1   | New putative <i>doc</i>                                     |
| <i>phd/doc</i> -2                                           | 2674530-2674754,30250372  | 75,129 | -1   | New putative <i>doc</i>                                     |
| <i>ccdAB</i> -1                                             | 30249070,30249069         | 87,105 | +143 |                                                             |
| <b><u>Helicobacter pylori_26695</u> 15644634 1,667,867</b>  |                           |        |      |                                                             |
| <i>relBE</i> -1                                             | 15645511,15645510         | 95,90  | +13  |                                                             |
| <i>relBE</i> -2                                             | c946969-946688,15645512   | 93,88  | -20  | <i>relB</i> with corrected start (GI:15645513)              |
| <i>relBE</i> -3                                             | 15645620,1067530-1067742  | 110,71 | +59  | New putative <i>relE</i>                                    |
| <b><u>Helicobacter pylori_J99</u> 15611071 1,643,831</b>    |                           |        |      |                                                             |
| <i>relBE</i> -1                                             | -,15611892                | -,100  | NA   | Solitary <i>relE</i>                                        |
| <i>relBE</i> -2                                             | 15611899,15611898         | 95,90  | +13  |                                                             |
| <b><u>Escherichia coli_CFT073</u> 26245917 5,231,428</b>    |                           |        |      |                                                             |
| <i>relBE</i> -1                                             | 26248392,26248391         | 92,84  | -4   |                                                             |
| <i>higBA</i> -1                                             | 26247766,26247767         | 94,90  | -1   | RGO, Alt. name: <i>yddM</i>                                 |
| <i>higBA</i> -2                                             | 26250653,26250652         | 96,103 | 0    | RGO                                                         |
| <i>higBA</i> -3                                             | 26251283,26251282         | 94,136 | +1   | RGO                                                         |
| <i>ccdAB</i> -1                                             | 26245972,26245973         | 77,104 | +2   |                                                             |
| <b><u>Escherichia coli_K12</u> 16127994 4,639,221</b>       |                           |        |      |                                                             |
| <i>relBE</i> -2                                             | 16128212,16128211         | 86,92  | +2   | Alt. name: <i>dinJ yafQ</i>                                 |
| <i>relBE</i> -1                                             | 16129523,16129522         | 79,95  | -1   | Alt. name: <i>relB-I relE-I</i>                             |
| <i>relBE</i> -3                                             | 16129958,c2087233-2087487 | 83,84  | -4   | Alt. name: <i>yefM yoeB</i> , new GI in data base: 33347611 |
| <i>higBA</i> -1                                             | 13878954,-                | 94,-   | NA   | Solitary <i>higA</i>                                        |
| <i>mazEF</i> -1                                             | 16130690,16130689         | 82,111 | -1   | Alt. name: <i>chpA</i>                                      |
| <i>mazEF</i> -2                                             | 16132046,16132047         | 85,116 | -7   | Alt. name: <i>chpB</i>                                      |
| <b><u>Escherichia coli_O157</u> 15829254 5,498,450</b>      |                           |        |      |                                                             |
| <i>relBE</i> -1                                             | 15829507,15829506         | 86,86  | +18  | Alt. name: <i>dinJ yafQ</i>                                 |
| <i>parDE</i> -1                                             | 15829715,15829716         | 80,93  | -8   |                                                             |
| <i>parDE</i> -2                                             | 15830322,15830321         | 63,95  | -1   |                                                             |
| <i>parDE</i> -3                                             | 15831534,15831535         | 75,92  | +1   |                                                             |
| <i>higBA</i> -1                                             | 15832124,15832123         | 96,112 | -11  | RGO                                                         |
| <i>mazEF</i> -1                                             | 15832897,15832896         | 82,111 | -1   | Alt. name: <i>chpA</i>                                      |
| <i>mazEF</i> -2                                             | 15834456,15834457         | 85,116 | -7   | Alt. name: <i>chpB</i>                                      |
| <i>ccdAB</i> -1                                             | 15829306,15829307         | 77,104 | +2   |                                                             |
| <b><u>E. coli_O157_H7_EDL933</u> 16445223 5,528,445</b>     |                           |        |      |                                                             |
| <i>relBE</i> -1                                             | 15799931,c283932-284192   | 86,87  | +18  | Alt. name: <i>dinJ yafQ</i> , corrected start GI:15799930   |
| <i>parDE</i> -1                                             | 15800137,15800138         | 80,93  | -8   |                                                             |
| <i>parDE</i> -2                                             | 15800838,c1256683-1256967 | 63,95  | -1   | New putative <i>parE</i>                                    |
| <i>parDE</i> _3                                             | 15801987,2324393-2324668  | 89,92  | +1   | New putative <i>parE</i>                                    |
| <i>higBA</i> -1                                             | 15802545,15802544         | 96,112 | -11  | RGO                                                         |
| <i>mazEF</i> -1                                             | 15803304,15803303         | 82,111 | -1   | Alt. name: <i>chpA</i>                                      |
| <i>mazEF</i> -2                                             | 15804815,15804816         | 85,116 | -7   | Alt. name: <i>chpB</i>                                      |
| <i>ccdAB</i> -1                                             | 15799732,15799733         | 77,104 | +2   |                                                             |
| <b><u>Shigella flexneri_2a</u> 24111450 4,607,203</b>       |                           |        |      |                                                             |
| <i>relBE</i> -1                                             | 24112921,24112920         | 79,95  | -1   | Alt. name: <i>relBE-I</i>                                   |
| <i>relBE</i> -2                                             | 24113402,24113399         | 90,84  | NA   | <i>yefM yoeB</i> separated by <i>insAB</i>                  |
| <i>mazEF</i> -1                                             | 24114677,24114678         | 89,121 | -7   |                                                             |
| <b><u>Shigella flexneri_2a_2457T</u> 30061571 4,599,354</b> |                           |        |      |                                                             |
| <i>relBE</i> -1                                             | 30063051,30063050         | 79,95  | -1   | Alt. name: <i>relBE-I</i>                                   |
| <i>relBE</i> -2                                             | 30063468,c2077698-2077949 | 90,84  | -4   | Alt. name: <i>yefM yoeB</i> , new putative <i>relE</i>      |
| <b><u>Salmonella typhimurium_LT2</u> 16763390 4,857,432</b> |                           |        |      |                                                             |
| <i>relBE</i> -1                                             | 16764896,16764895         | 82,94  | -11  |                                                             |
| <i>relBE</i> -2                                             | 16766805,16766804         | 86,91  | +2   |                                                             |
| <i>relBE</i> -3                                             | 16767695,16767696         | 80,94  | -11  |                                                             |

|                                                                |                                   |         |     |                                                               |
|----------------------------------------------------------------|-----------------------------------|---------|-----|---------------------------------------------------------------|
| <i>parDE</i> -1                                                | c3102440-3102715,c3102178-3102468 | 91,96   | -29 | New putative <i>parDE</i>                                     |
| <i>higBA</i> -1                                                | 16767183,16767182                 | 113,105 | -4  | RGO                                                           |
| <i>higBA</i> -2                                                | 4241948-4242235,4241636-4241944   | 96,103  | 0   | RGO, new putative <i>higBA</i>                                |
| <i>vapBC</i> -1                                                | 16766336,16766335                 | 75,132  | -1  |                                                               |
| <i>phd/doc</i> -1                                              | 16766845,16766844                 | 75,122  | -4  |                                                               |
| <b><u>Salmonella typhi 16758993 4,809,037</u></b>              |                                   |         |     |                                                               |
| <i>relBE</i> -1                                                | 16763249,16763250                 | 80,94   | -11 |                                                               |
| <i>parDE</i> -1                                                | c2958334-2958059,c2957794-2958012 | 91,73   | -74 | New putative <i>parDE</i>                                     |
| <i>higBA</i> -1                                                | 16762224,16762225                 | 103,120 | -4  | RGO                                                           |
| <i>vapBC</i> -1                                                | 16761811,16761810                 | 75,132  | -1  |                                                               |
| <i>vapBC</i> -2                                                | 16762401,16762400                 | 82,124  | -1  |                                                               |
| <i>phd/doc</i> -1                                              | 16759892,16759893                 | 95,165  | -10 |                                                               |
| <b><u>Salmonella typhi Ty2 29140543 4,791,961</u></b>          |                                   |         |     |                                                               |
| <i>relBE</i> -1                                                | 29144728,29144729                 | 80,94   | -11 |                                                               |
| <i>parDE</i> -1                                                | c2944229-2943954,c2943689-2943907 | 91,73   | -74 | New putative <i>parDE</i>                                     |
| <i>higBA</i> -1                                                | 29143713,29143714                 | 113,120 | -4  | RGO                                                           |
| <i>vapBC</i> -1                                                | 29143295,29143294                 | 75,132  | -1  |                                                               |
| <i>vapBC</i> -2                                                | 29143889,29143888                 | 82,124  | -1  |                                                               |
| <i>phd/doc</i> -1                                              | 29142336,29142335                 | 95,165  | -10 |                                                               |
| <b><u>Yersinia pestis CO92 chr. 16120353 4,653,728</u></b>     |                                   |         |     |                                                               |
| <i>relBE</i> -1                                                | -,16121191                        | -,86    | NA  | Solitary <i>relE</i>                                          |
| <i>higBA</i> -1                                                | c964230-964379,16121186           | 50,108  | -5  | RGO, new putative <i>higBA</i>                                |
| <i>higBA</i> -2                                                | 16121389,16121388                 | 106,103 | +7  | RGO                                                           |
| <i>higBA</i> -3                                                | 16122544,16122545                 | 107,104 | -4  | RGO                                                           |
| <i>higBA</i> -4                                                | 16123631,16123632                 | 103,122 | +23 | RGO                                                           |
| <i>phd/doc</i> -1                                              | 16122085,16122086                 | 101,158 | +10 |                                                               |
| <b><u>Yersinia pestis KIM chr 22123922 4,600,755</u></b>       |                                   |         |     |                                                               |
| <i>relBE</i> -1                                                | c3399757-3400077,22126965         | 107,106 | -4  | New putative <i>relB</i>                                      |
| <i>relBE</i> -2                                                | -,c3599007-3599264                | -,86    | NA  | Solitary <i>relE</i>                                          |
| <i>higBA</i> -1                                                | 22124613,22124612                 | 103,122 | +13 | RGO                                                           |
| <i>higBA</i> -2                                                | 22125904,2218599-2218967          | 107,123 | -1  | RGO                                                           |
| <i>higBA</i> -3                                                | c3594262-3594411,c3594407-3594730 | 50,108  | -5  | RGO, new putative <i>higAB</i> ;<br>GI:22127138 was corrected |
| <i>phd/doc</i> -1                                              | c2738578-2738880,22126357         | 101,158 | +13 | New putative <i>doc</i>                                       |
| <b><u>S. oneidensis MR 1 chr 24371600 4,969,803</u></b>        |                                   |         |     |                                                               |
| <i>relBE</i> -1                                                | 24376115,24376114                 | 85,101  | -13 |                                                               |
| <i>parDE</i> -1                                                | 24373020,24373019                 | 102,97  | -38 |                                                               |
| <b><u>Vibrio cholerae chromosome 2 15600771 1,072,315</u></b>  |                                   |         |     |                                                               |
| <i>relBE</i> -1                                                | 15601089,15601088                 | 92,98   | -35 |                                                               |
| <i>relBE</i> -2                                                | c343886-343602,15601113           | 94,92   | -4  | New putative <i>relB</i>                                      |
| <i>relBE</i> -3                                                | 15601185,15601186                 | 97,119  | -4  |                                                               |
| <i>relBE</i> -4                                                | 15601208,15601207                 | 82,96   | -11 |                                                               |
| <i>relBE</i> -5                                                | 15601238,15601239                 | 90,96   | -14 |                                                               |
| <i>relBE</i> -6                                                | 15601249,15601250                 | 85,100  | -13 |                                                               |
| <i>relBE</i> -7                                                | c433678-433394,15601263           | 94,92   | -4  | New putative <i>relB</i>                                      |
| <i>parDE</i> -1                                                | 15601077,15601076                 | 80,111  | 0   |                                                               |
| <i>parDE</i> -2                                                | 15601124,15601123                 | 153,99  | -14 |                                                               |
| <i>parDE</i> -3                                                | 15601149,15601148                 | 80,111  | 0   |                                                               |
| <i>higBA</i> -1                                                | 15601155,15601154                 | 105,117 | +10 | RGO, antitoxin <i>ybaQ</i>                                    |
| <i>higBA</i> -2                                                | 15601230,15601229                 | 104,110 | -14 | RGO                                                           |
| <i>phd/doc</i> -1                                              | 418614-418781,15601236            | 56,133  | -1  | New <i>phd</i> ; GI: 15601235 was corrected                   |
| <b><u>Vibrio parahaemolyticus chr 1 28896774 3,288,558</u></b> |                                   |         |     |                                                               |
| <i>relBE</i> -1                                                | 28898595,28898594                 | 99,90   | -11 |                                                               |
| <i>relBE</i> -2                                                | 28898603,28898604                 | 94,92   | -4  |                                                               |
| <i>relBE</i> -3                                                | 1935517-1935800,28898617          | 94,92   | -4  | New putative <i>relB</i>                                      |
| <i>parDE</i> -1                                                | 28898659,28898658                 | 42,61   | +21 |                                                               |
| <b><u>Vibrio vulnificus CMCP6 chr 1 27363490 3,281,945</u></b> |                                   |         |     |                                                               |
| <i>relBE</i> -1                                                | 27365728,27365729                 | 85,100  | -13 |                                                               |
| <i>relBE</i> -2                                                | 27365748,27365749                 | 85,100  | -13 |                                                               |
| <i>relBE</i> -3                                                | 27365845,27365846                 | 93,95   | -4  |                                                               |
| <i>parDE</i> -1                                                | 27365829,27365828                 | 80,99   | -4  |                                                               |



|                                                                 |                                 |         |     |                                                          |  |
|-----------------------------------------------------------------|---------------------------------|---------|-----|----------------------------------------------------------|--|
| <b><u>Vibrio vulnificus CMCP6 chr 2 27366463 1,844,853</u></b>  |                                 |         |     |                                                          |  |
| <i>relBE-1</i>                                                  | 27367843,27367844               | 94,92   | -4  |                                                          |  |
| <b><u>X. axonopodis pv citri str 306 21240774 5,175,554</u></b> |                                 |         |     |                                                          |  |
| <i>relBE-1</i>                                                  | 21241894,21241895               | 86,58   | -4  |                                                          |  |
| <i>parDE-1</i>                                                  | 21240854,21240855               | 85,99   | -13 |                                                          |  |
| <i>parDE-2</i>                                                  | 21243162,21243161               | 92,96   | -13 |                                                          |  |
| <i>vapBC-1</i>                                                  | 21242627,21242628               | 82,136  | -4  |                                                          |  |
| <i>vapBC-2</i>                                                  | 21242923,21242922               | 79,130  | +7  |                                                          |  |
| <i>vapBC-3</i>                                                  | 21245026,21245027               | 84,138  | -4  |                                                          |  |
| <i>phd/doc-1</i>                                                | 21241949,21241948               | 73,145  | -4  |                                                          |  |
| <b><u>X. campestris pv ATCC 33913 21229478 5,076,188</u></b>    |                                 |         |     |                                                          |  |
| <i>relBE-1</i>                                                  | c74344-74069,21229535           | 93,105  | -4  | New putative <i>relB</i>                                 |  |
| <i>relBE-2</i>                                                  | 21230492,21230493               | 97,105  | -4  |                                                          |  |
| <i>relBE-3</i>                                                  | 21230523,21230524               | 87,102  | +6  |                                                          |  |
| <i>parDE-1</i>                                                  | c3665126-3665371,21232522       | 82,100  | -1  | New putative <i>parD</i>                                 |  |
| <i>vapBC-1</i>                                                  | 21231084,21231085               | 99,131  | -4  |                                                          |  |
| <i>vapBC-2</i>                                                  | 21231309,21231310               | 85,135  | -4  |                                                          |  |
| <i>ccdAB-1</i>                                                  | 21230189,21230188               | 101,105 | -4  |                                                          |  |
| <b><u>Xylella fastidiosa chr 15836605 2,679,306</u></b>         |                                 |         |     |                                                          |  |
| <i>relBE-1</i>                                                  | 15838297,c1620819-1621091       | 98,91   | -17 | New putative <i>relE</i>                                 |  |
| <i>relBE-2</i>                                                  | 15838658,15838657               | 90,102  | +3  |                                                          |  |
| <i>relBE-3</i>                                                  | 15838666,15838665               | 92,98   | -13 |                                                          |  |
| <i>relBE-4</i>                                                  | 15838672,15838671               | 86,93   | -14 |                                                          |  |
| <i>parDE-1</i>                                                  | 15838625,15838626               | 83,102  | -4  |                                                          |  |
| <i>parDE-2</i>                                                  | 15838662,15838661               | 80,61   | -8  |                                                          |  |
| <i>higBA-1</i>                                                  | 15837156,c527947-528210         | 114,88  | -17 | RGO, New putative <i>higB</i>                            |  |
| <i>higBA-2</i>                                                  | 15837322,15837323               | 91,105  | -12 | RGO                                                      |  |
| <i>higBA-3</i>                                                  | 15838173,15838174               | 93,112  | -4  | RGO                                                      |  |
| <i>higBA-4</i>                                                  | 15838197,15838198               | 99,98   | -4  | RGO                                                      |  |
| <i>higBA-5</i>                                                  | 15838278,15838279               | 93,112  | -4  | RGO                                                      |  |
| <i>higBA-6</i>                                                  | 15838303,15838304               | 101,102 | -4  | RGO                                                      |  |
| <i>higBA-7</i>                                                  | 15838310,c1629883-1630197       | 96,105  | +17 | RGO, new putative <i>higB</i>                            |  |
| <i>higBA-8</i>                                                  | 15839352,15839353               | 102,113 | +3  | RGO                                                      |  |
| <i>vapBC-1</i>                                                  | 304978-305193,15836896          | 72,144  | -29 | New putative <i>vapB</i>                                 |  |
| <i>vapBC-2</i>                                                  | 15838191,15838190               | 86,142  | 0   |                                                          |  |
| <i>mazEF-1</i>                                                  | 15838461,15838460               | 73,109  | -10 |                                                          |  |
| <b><u>Xylella fastidiosa Temecula1 28197945 2,519,802</u></b>   |                                 |         |     |                                                          |  |
| <i>relBE-1</i>                                                  | 1298015-1298314,1298354-1298761 | 100,136 | +39 | New putative <i>relBE</i> ;<br>GI:28198992 was corrected |  |
| <i>relBE-2</i>                                                  | 28199073,28199074               | 98,88   | -17 |                                                          |  |
| <i>parDE-1</i>                                                  | 28198860,28198859               | 79,102  | -10 |                                                          |  |
| <i>higBA-1</i>                                                  | 28198286,28198285               | 91,93   | +10 | RGO                                                      |  |
| <i>higBA-2</i>                                                  | 28198867,1167816-1168139        | 93,108  | -1  | RGO                                                      |  |
| <i>higBA-3</i>                                                  | 28199067,28199066               | 101,100 | +3  | RGO                                                      |  |
| <i>higBA-4</i>                                                  | 28199225,28199224               | 99,93   | +9  | RGO                                                      |  |
| <i>vapBC-1</i>                                                  | 303404-303628,28198163          | 75,132  | +7  |                                                          |  |
| <b><u>Haemophilus influenzae 16271976 1,830,138</u></b>         |                                 |         |     |                                                          |  |
| <i>relBE-1</i>                                                  | 16272650,16272651               | 98,102  | -1  |                                                          |  |
| <i>higBA-1</i>                                                  | 16272602,16272603               | 98,119  | -8  | RGO                                                      |  |
| <i>higBA-2</i>                                                  | 16273170,16273169               | 107,101 | +10 | RGO                                                      |  |
| <i>higBA-3</i>                                                  | 16273326,16273325               | 97,99   | -4  | RGO                                                      |  |
| <i>vapBC-1</i>                                                  | 16272274,16272275               | 78,134  | -4  |                                                          |  |
| <i>vapBC-2</i>                                                  | 16272886,16272885               | 77,132  | -1  |                                                          |  |
| <b><u>Pseudomonas aeruginosa 15595198 6,264,403</u></b>         |                                 |         |     |                                                          |  |
| <i>relBE-1</i>                                                  | 15595323,15595322               | 75,93   | -4  |                                                          |  |
| <i>parDE-1</i>                                                  | 796960-797238,15595926          | 93,115  | +12 | New putative <i>parD</i>                                 |  |
| <i>higBA-1</i>                                                  | 15599869,c5242573-5242848       | 101,92  | +11 | New putative <i>higB</i>                                 |  |
| <b><u>Pseudomonas putida KT2440 26986745 6,181,863</u></b>      |                                 |         |     |                                                          |  |
| <i>relBE-1</i>                                                  | 26989222,26989223               | 90,97   | -13 |                                                          |  |
| <i>relBE-2</i>                                                  | 26989659,26989658               | 94,84   | +19 |                                                          |  |
| <i>higBA-1</i>                                                  | 334364-334672,334049-334360     | 103,104 | +3  | RGO, new putative <i>higBA</i>                           |  |
| <i>higBA-2</i>                                                  | -,26987565                      | -,98    | NA  | Solitary <i>higB</i>                                     |  |
| <i>higBA-3</i>                                                  | 26987933,26987934               | 98,111  | -10 | RGO                                                      |  |

|                                                            |                           |         |     |                               |
|------------------------------------------------------------|---------------------------|---------|-----|-------------------------------|
| <i>higBA</i> -4                                            | c1418120-1418494,26987976 | 125,116 | -40 | RGO, new putative <i>higA</i> |
| <i>higBA</i> -5                                            | 26988317,26988318         | 99,92   | +8  | RGO                           |
| <i>mazEF</i> -1                                            | 26987506,26987507         | 84,115  | -4  |                               |
| <b><u>Pseudomonas_syringae</u> 28867243 6,397,126</b>      |                           |         |     |                               |
| <i>relBE</i> -1                                            | 28867568,28867567         | 92,82   | +25 |                               |
| <i>relBE</i> -2                                            | 28870831,28870832         | 79,94   | -11 |                               |
| <i>relBE</i> -3                                            | 28872496,28872495         | 79,96   | -11 |                               |
| <i>parDE</i> -1                                            | 28867472,28867473         | 83,116  | -12 |                               |
| <i>higBA</i> -1                                            | 28867446,28867445         | 101,92  | +9  | RGO                           |
| <i>higBA</i> -2                                            | 28867652,28867653         | 97,92   | +12 | RGO                           |
| <i>higBA</i> -3                                            | 28872483,28872482         | 114,107 | -4  | RGO                           |
| <i>vapBC</i> -1                                            | 28868263,28868262         | 76,134  | -1  |                               |
| <i>vapBC</i> -2                                            | 28869204,28869203         | 83,150  | -1  |                               |
| <b><u>Leptospira_intrerrogans_I</u> 24212700 4,332,241</b> |                           |         |     |                               |
| <i>relBE</i> -1                                            | -,3672435-3672671         | -,79    | NA  | Solitary <i>relE</i>          |
| <i>vapBC</i> -1                                            | 24213637,24213636         | 77,132  | +1  |                               |
| <i>vapBC</i> -2                                            | 24213702,24213701         | 76,132  | -1  |                               |
| <i>vapBC</i> -3                                            | 24215974,24215973         | 72,147  | -11 |                               |
| <i>mazEF</i> -1                                            | 24214480,24214481         | 78,113  | -7  |                               |
| <i>mazEF</i> -2                                            | 24215544,24215543         | 82,113  | -14 |                               |
| <b><u>D. radiodurans_chr_1</u> 15805042 2,648,638</b>      |                           |         |     |                               |
| <i>vapBC</i> -1                                            | 15805445,15805446         | 85,137  | -4  |                               |
| <i>vapBC</i> -2                                            | 15806541,15806540         | 81,141  | -4  |                               |
| <i>vapBC</i> -3                                            | 15807097,15807096         | 71,130  | 0   |                               |
| <i>mazEF</i> -1                                            | 15805443,15805444         | 80,117  | -7  |                               |
| <i>mazEF</i> -2                                            | 15805688,15805689         | 84,115  | -10 |                               |

#### Footnotes to Table S2:

a) The TA loci belonging to the seven families are listed with the most abundant families first (*vapBC*, *relBE*, etc). To discriminate TA loci belonging to the same TA family and encoded by the same chromosome, all TA loci was designated a number, with the numbers increasing with increasing locus position in a given chromosome. One exception to this rule was *relBE* of *E. coli* which, for historical reasons, was designated *relBE*-1, although the homologous *dinJ yafQ* locus has a lower chromosomal position.

b) Unique identifiers of antitoxin and toxin genes were either GIs or, for un-annotated genes, co-ordinates in the DNA. A "c" in front of a pair of co-ordinates indicates that the gene was located on the chromosomal minus-strand.

c) The sizes of the antitoxin and toxin genes are given by the number of codons predicted from the DNA.

d) dist. gives the distance (in bp) between the antitoxin and toxin genes. A "-" indicates overlap between the genes.

e) The comments column yields information of peculiarities discovered during the analysis. RGO indicates reversed gene order for the *higBA* loci.

f) Each species name is followed by the GI identifier of its DNA sequence. The size (in bp) of the corresponding chromosome is also given. DB = Data base. Solitary toxin genes are also indicated in the Comments column.

## Table S3: Protein sequences of un-annotated toxins and antitoxins in 126 prokaryotic organisms

### Aeropyrum pernix

>relB|14600379:984865-985164, length 100, Aeropyrum\_pernix, RelB  
MLISVFLMRRVSECVRWKLFLNLHVITYYILADGGLIVSSKSKVKVEVEVEVPEGDDEGV  
YREEFRRRELAKRIILNVMLDKDVEPAKRAVAKTLREKGGEG

>vapB|14600379:c199314-199072, length 81, Aeropyrum\_pernix, VapB  
MLLLVVSTVSKVIRVKYKGVLPLEPLDLQEGEEVQVVIQPGEPIDAEKYYGIARKHRPN  
LDKKEFLEVELEEIEDEDIRGH

>vapB|14600379:c697607-697245, length 121, Aeropyrum\_pernix, VapB  
MAMNIDGDGVVSTTAGSTAYSLSGGPIIDPRLDVIVLTPLNVPQLFLRSIVVPSGSRV  
TVEASVYSNPLVNVNIDGQVYVELEPFGGIVDIERCOSGVIARFRWWEDYERLYTRLLAY  
W

>vapB|14600379:c1008442-1008167, length 92, Aeropyrum\_pernix, VapB  
MVPFGHDPNDFARSGIKTCQWRGRNINTNIKNTTNGEAVATKKITIEVEVPEDFDEERGV  
ERLIELLRKGAPLGVKQKDLRRQRIYASRTRY

>vapB|14600379:c1508755-1508399, length 119, Aeropyrum\_pernix, VapB  
MAIGTQLDPSVTKADNLVGNVVGKPGELPEPLTLRIEHHLLEKVVGMKEEARVEPIRRG  
EMLMLSVGTAITLGVVTRAGKDEIEVQLRRPVVTPKARVALSRIMGRWRLIGWGLIK

>vapB|14600379:c1666639-1666448, length 64, Aeropyrum\_pernix, VapB  
MSKVIRVRYEKGVLPKIGEVVLEGEELVVVVRKSFGRFKDEAGKYMFKADRDTVKEFV  
EERR

>vapB|14600379:c760494-760258, length 79, Aeropyrum\_pernix, VapB  
MGWGCAMSKVIRVKYEGGVLPLEPLVLEGEVEVIRRRVFGEDYRELVDLSELPLK  
GKAELLDLVEELYLEEARL

### Sulfolobus solfataricus

>vapB|15896971:360012-360608, length 199, Sulfolobus\_solfataricus, VapB  
MIRSFVNVKPGTQFNEKGGVIGGSI IQGLFKVDQEI KVLPLGRVVEKQGVSYEPIFTKI  
SSIRFGDEEFKEAKPGGLVAIGTYLDPSTKADNLLGSIITLADAEVPLWNIRIKYNLL  
ERVVGAKEMLKVDPIRAKETLMLSVGSSSTLGI VTSVKKDEIEVELRRPVAVWSNNIRTV  
ISRQIAGRWRMIGWGLVEI

>vapB|15896971:1340360-1340617, length 86, Sulfolobus\_solfataricus, VapB  
MYLHLKFTMERMISKVTRNFQVTIPYEIRKVLGIKEGDYIEFAIENGKVMIKPVRKVWS  
TIRLGREVTVEEIEEIASKAFKDDSS

>vapB|15896971:c683385-683083, length 101, Sulfolobus\_solfataricus, VapB  
MKEVKTHYFVTLNPPRSITLQPI TVSVGALSAIGILAYLLSRLDKGEDNIREVVEKALD  
EAIKEKEKERLRETALKIKELMKDVNEEWATVIRENRNER

>vapB|15896971:c725687-725481, length 69, Sulfolobus\_solfataricus, VapB  
MSERIKEKIYDTNALIKIHKNKSLSTTNYVTT SILNVIEYPPIIDLKEKLI I IYPTRSD  
YELA IKDNG

>vapB|15896971:c1503996-1503685, length 104, Sulfolobus\_solfataricus, VapB  
MNFSDPQSSIQSKLYIHTLFTFVSKI IRVSEVKEKLVKISAELELSEGRVSLNDTI  
KYLITLYEEKSNKNSSELLSLLGSAGKIREEFERSRIEDESSD

>vapB|15896971:c1577585-1577400, length 62, Sulfolobus\_solfataricus, VapB  
MKEGDILILRVEDGKIVLEPERKVSFDDLK KMEHSAKISYANKAKLGD LINVSLEEEF  
DN

>vapB|15896971:1582391-1582642, length 84, Sulfolobus\_solfataricus, VapB  
MGIQNQLMGYIVTVDERGRIVIPKDIRERLNLKEGSKVEISVDEKGR I I I I VRRISVDNI  
YGIAGRERVSIEEIEEALGFEDND

>vapB|15896971:1620321-1620638, length 106, Sulfolobus\_solfataricus, VapB  
MIHLRIRKRYNIRMSYFLHMP I ISIRIDEKLLKKMDELSYINWSEI IRRKIEEVEIEEEE  
EKRRGKRKYDKKIAEASVRSYEFFLNYGGKSSEE I IREWRDKNWQL

>vapB|15896971:c1734033-1733776, length 86, Sulfolobus\_solfataricus, VapB  
MFTIKENTMTSTVISIRVDERLKELEELGIDYPELVRRYLEEVVRKEKMRRELREANGI  
REELLSHGYSAPSALVREDRDGYH

>vapB|15896971:1783470-1783712, length 81, Sulfolobus\_solfataricus, VapB  
MYLMEVKVHKKGIIVIPAEVRRRNLNIKEGVSIELEVEGDKI I LKRKLTLLDAYGIDKEMG  
DSAVKELEKLRKEEVEKENS

>vapB|15896971:1914151-1914375, length 75, Sulfolobus\_solfataricus, VapB  
MKSTITVSKKVEVLERKKKEMEIKLNKPLSWDEFFQNI F REEEERIPKLT EEEAEILKD  
LTKEDRKNWRIREFV

>vapB|15896971:c2041164-2040874, length 97, Sulfolobus\_solfataricus, VapB  
MSATNSLLYKDLNAIEIIFVNP I FYLLRSVVIPKSLILRLEDKGYPTARVVVDGEVVT

LIKTNQEITVRVSQHKAKILRFFKLDLIGEV LHAYHI

>vapB|15896971:1073660-1073923, length 88, Sulfolobus\_solfataricus, VapB  
MYENFIYVYLVYIYMSDVISVRVKELKKAEELGINVREVVEKALEEAI REKEKEELKD  
MTMKIKELMRDVSEYDWWSTVRESRDER

>vapB|15896971:1742082-1742303, length 74, Sulfolobus\_solfataricus, VapB  
MSTVISVRKKEIKELEKHGVDIDQEVKRFLEELYLKVKAKEYINKWIEDLKDVKPSSE  
GFSSNSVREDRESH

>vapB|15896971:1784438-1784701, length 88, Sulfolobus\_solfataricus, VapB  
MYESFIYVYFVYIYMSDVISVRVKELKKRAEELGINIREVVEKALEEAI REKEKEELKD  
IVMRIKELMRDVSEDDWVRAVRESRDER

>vapB|15896971:c1788331-1788080, length 84, Sulfolobus\_solfataricus, VapB  
MYTSYMKTIMIRDDVYKLVKVEIKGDKSFSEIEEELIEESLTLRRRKLEKYFGILNEEEAE  
EIMKEIKEVRKITDESINRKLNSY

**Sulfolobus tokodaii**

>phd|24473558:1143830-1143531, length 97, Sulfolobus\_tokodaii, Phd  
MTDKKPFALSEVAQRVLIIVLGRNRLTVRELVEKTDNTSGSIKRALEELAKLNLIKKEEK  
ENVFPYRRLISLVEVGRVAKRVIEIEELVKKVQNSG

>doc|24473558:c1317467-1317895, length 143, Sulfolobus\_tokodaii, doc  
MENKFRILVITSLDKSFITWLNDRVLKEEDPSLSTVINEGNIIEGAIYSVAMDFEINHNS  
RSLAVLIHHLVVGHPFADGNKRTATLLITLISKLYERDVVLEENLMSLITIIAEISNE  
SENDIDKLQKIIIEEIMKNLTVHY

>doc|24473558:c1328737-1329249, length 171, Sulfolobus\_tokodaii, doc  
MYVDRVYFIRLNILLEKLLKLNALLKEFEAWIRGESEKPLIEIHDKLIANDTYSEG  
GVINLDDIGIAIYSSIEDLMRNDVSRSLAVLTYHLVVSHPFVDGNKRTTLGFLNLNLT  
LFEDEIEIPQDVDTLMQTLVEIADNPPEEDEMAINRVRSIIRGLIPVQNQD

>vapB|24473558:c673537-673358, length 60, Sulfolobus\_tokodaii, VapB  
MLERKKKEMEIKLDKPLTWDEFFQEVFKEENIPKLTEEEAETLKKLVLEDRKNKWVREFA

>vapC|24473558:c673379-673011, length 123, Sulfolobus\_tokodaii, VapC (gi|15920915 start corrected)  
MESKRVCCLDITDILIDSFKRDPKRIIGYYTTCVNLYEFLRGLAFIKNVDEFKVVVEANLN  
VLCIDNSSLKIASRIYADLRKKGNLVEDPDLIASICIANNLVLRTNKKHFRRLIEEYGL  
RLM

>vapB|24473558:c2516-2271, length 82, Sulfolobus\_tokodaii, VapB  
MFSVYVYNNMKTIVYSLRIDKELREEMEKYNIKWNEEIEENFIRRIIEELKKEEILKKINEI  
LQTMPETNSSAELVREDRDN

>vapB|24473558:c397414-397157, length 86, Sulfolobus\_tokodaii, VapB  
MENYQLLERVVGAKELVKVENIKKGEVLMMLTGSATTLGVAKNIKNDELEVELKRPLVVW  
DKDLRVVISRQVSGRWRLVWGWIKI

>vapB|24473558:761620-761892, length 91, Sulfolobus\_tokodaii, VapB  
MLLQSDNMSETIRVSKVRELKIMGELQIERGEKVDVNDVIEYLLSLYRRKNPEILR  
RMVGLVPNISYEDLRKERKKELEYEKEYGI

>vapC|24473558:1818807-1819082, length 92, Sulfolobus\_tokodaii, VapB  
MLFYVYENFIYTKIVYLIMSTVISVRVKELKEKAEELGINIREVVEKALEEAI REKEKE  
EIKETARKIKELMKDISEDEWITSIREDRYER

>vapB|24473558:2138189-2138767, length 193, Sulfolobus\_tokodaii, VapB  
MPILGVKFGRRSALLDIRPENIKEALELLQKNKYTIEEYPMLEAKSKNINTIAFNEIAIL  
FNNPETVYGSVNIKERKILFEGDGLVIATPQGSWAWSYSATRVLLHKDINGIEITFINPI  
IPNIKALIIPQTETILVKLEDKGRTQNVVISDGEIVGNLISKEDEELTITLSKRKAKIL  
RFFNLIEFDGLFT

>vapB|24473558:c1303456-1303313, length 48, Sulfolobus\_tokodaii, VapB  
MENVSTGSEIERLKKLGVEEKDLIVEPPQGEFFQKELKRKSMIQMF

>vapC|24473558:c1302999-1303355, length 119, Sulfolobus\_tokodaii, VapC (start corrected)  
MSERTKEKIYDTNVLIEIYKNRTLQDKLDFIITSILNVIEYPPILNLRNKLIVVYPTKED  
YELALKIMVKLRKIGKPVNVVDIILASIAINHNMIVVTNDRDFDLIKKVEDKLEIQVNP

>vapC|24473558:2013264-2013695, length 144, Sulfolobus\_tokodaii, vapC  
MEKRLINLSELIVDTSFLLPLVGIKVKIKDSLLEGKAIYYPNLLLTELLAVIFKEAKKL  
KLNKVPPEEAMKGLIYVLSNVNLISIEELEIETIYIEILNKGWNDIFDAILYTAYKSTKIPL  
ITMDKSFYNFLKENGMDVKGIILL

**Pyrobaculum aerophilum**

>vapB|18311643:335372-335986, length 204, Pyrobaculum\_aerophilum, VapB  
MLGGDGTLEAIRRHPCVLESVVIHLGLGKVNFKSAEITLPIDEAVSRVLKGEYKVLLEL  
STLESDDGCIALNEAAVYRRDPGRLLSFKITTDGQIAGRADGIIIVSTPHGASGYVSTFG  
PVVDYRADVIVVSVFVAPYTYLRLPMLVTSKRVVIEETREDAVLVCDGREARMGRVFEVAKG  
QRRKLAIFFGDFQFIQVAERLRS

>vapB|18311643:2133278-2133844, length 189, Pyrobaculum\_aerophilum, VapB

MREAERALLELRVGLKDKFYLSIGRRLLAAWKYTYETHVDLMLPLTSVGAEGQFTPHHLSRI  
LTMSSEYAVRDALYNYLEIADIEDVRVGLVKGTGRIALYVKKGGLWTNGYNAGNYTKAVLP  
VLLQMLLANEGSSVFIDVDLAVPSGRAEVLLSALFEIARKRNLQLVASAKEPGFAEIAE  
KLGFTIAKL

**Archaeoglobus\_fulgidus**

>vapB|11497621:289024-289218, length 64, Archaeoglobus\_fulgidus, VapB  
MPKIEAIYENGVFQKPLQKVNFRPGSKVRIVIQEDKKEILRKYKGVFGKAEVEELREYEG  
EVMLE

>vapB|11497621:c271532-271335, length 66, Archaeoglobus\_fulgidus, VapB  
MPRVIEIYENGMFQKPLEKVDLPEGRFKILIEDFSEIDRIHEHVKKIAGEASKEKILEL  
LDEVMI

>vapB|11497621:290594-290764, length 57, Archaeoglobus\_fulgidus, VapB  
MSMEKIFIDTNVIDLLRGGKSVSVFFRDVEDGEIHGLTNKNGVSGNCLRLPDPYNG

>vapB|11497621:1978461-1978667, length 69, Archaeoglobus\_fulgidus, VapB  
MGHGCLRRYFVCDILLIKTDKTEKAIELFNRLNPIASVTVYEESEFYTGRLRIIAQKRLNIK  
NMLMLSGIL

>vapB|11497621:289639-289923, length 95, Archaeoglobus\_fulgidus, VapB  
MFLRLLSLRGNLFLSDPQSIQKSSKLYMRTELFKPLQKVDLKEGKIRLRDLDERGYID  
HSLIRELEVLLKNAPKTKIDLRELERLHDVGMKLY

>vapB|11497621:287426-287674, length 83, Archaeoglobus\_fulgidus, VapB  
MSNQKRLQPKPISSFMQTNMMPKVIIEAIYENGVFQKPLQKVELREGEKVKVIVDRGLTQLF  
GMFRHRRKTDLDEDMDLMITERA

>vapB|11497621:350180-350689, length 170, Archaeoglobus\_fulgidus, VapB  
MVNVTFENDDVGHVAAAI AVNGTYFILDQHLPPFDPQGYFIKWLDRDGKRIEKAELIDNNT  
TIPLNLSIGYVADRDAKSLESRIQYFKGTGIREDPRLNNGEKLPLGYREGYTLKLSLEM  
AEYYHPEFERQYAEHIYKLLLEESIEGRFKAFNLHLSIKGDVMEIVLYLAR

>vapB|11497621:c534011-533655, length 119, Archaeoglobus\_fulgidus, VapB  
MGIATKLDPTLTKSDALVGNVGHGPNLDPVLTSTFMEVNLLEVVGLDEEMEVEKIKMN  
EPLMLAVGTAITLGVVTSARDIVVVKLRPVCADKGSRAISRVRVGSRWRLIGAGIIR

>vapB|11497621:c550521-550279, length 60, Archaeoglobus\_fulgidus, VapB  
MLNSQRNMCMPNITLSPEDLYRKMKYGEIRWSEVVRKAIIEYLEKLEETETEVGSKEL

>vapB|11497621:c980157-979951, length 70, Archaeoglobus\_fulgidus, VapB  
MSGGLSFWRLNLSNFQRNPFLLPRKITDMPKIIIEAVYENGVFQKPLQKVDLREGEKVKIIA  
GNLVERLRKYRVKVDSDIVAEFISERR

>vapB|11497621:c1236899-1236693, length 69, Archaeoglobus\_fulgidus, VapB  
MRDALGIKPGTVMNVHLEGGKIIIEPSPEPPDIFVDLGERSEQILKESKIDEEEMRKLK  
RDLGVEGGD

>vapB|11497621:c981711-981451, length 87, Archaeoglobus\_fulgidus, VapB  
MANLHTKPFSSFSANHQHAKNHRSLRKRSLQAFAGGGFEGGGENKASHRGGNRRRYK  
IQQKSRPRRFGGIPKGEKMIVIDTSVFDALFRFNEKRSNMANEIFEIAQHRQIAVVEPE  
IFRMEIIGQLVRRTPKSEAITLYEGIV

>vapB|11497621:c556664-556485, length 81, Archaeoglobus\_fulgidus, VapB  
MGKVIQIEVPDRVNEKLNKLEKMLADKILDEIGKDYADIDLYNLYLTLKFPKTEDVTFD  
TDKELEYLRKMKKEKRRVWS

**Halobacterium\_sp\_NRC\_1**

>vapB|15789340:c67955-67662, length 98, Halobacterium\_sp\_NRC\_1, VapB  
MSKAVKVEDAKSRLEELQAEIRLETGESVTQOELLSRLIDDAYQDREAVIDSFRSSTVP  
LSDAEKARMEVGRVSSGVEIREEDIDDIYGGPEDEV

>vapB|15789340:c1474604-1474407, length 66, Halobacterium\_sp\_NRC\_1, VapB  
MMGSDGTELGMLYNITMDLKSGLTEHLLVEQTEESVAADFPIDGGRYRVFVSRVQAVKD  
YIVVRR

>vapB|15789340:c1510923-1510639, length 105, Halobacterium\_sp\_NRC\_1, VapB  
MPPTWESFEMVDLLERLVGAADGEQIDDISTGEPLMLTVGTATTVGSVTSARDGCEVA  
LKRFPVCPAGAKIAINRRVGARWRLLIGVGTLTSE

**M.thermoautotrophicum**

>vapB|15678031:202303-202899, length 199, M.thermoautotrophicum, VapB  
MYVARSDINKPGADPEHLAGGVIGGSLVQGRRLRVGDEIEIRPGIQVKDKGQKQWMSLHS  
TITGLVAGGEEMEEVGGPLVGVGTLDDPALTKADSLSGSVAGEPGLTLPVVRHSFTMETH  
LLERVVGTKEETKVEPIKTGEPLMINVGTTTTVGVVKSARADDADVLLKLPACAEEGQRI  
ALSRRVGARWRLLIGYGIK

>vapB|15678031:1698784-1698945, length 54, M.thermoautotrophicum, VapB  
MRFSGNTFSCQPGYHSAALKTLRMEITDIHIFAGIFPGAVQLIAFFLFIISGYIY

**Methanococcus\_jannaschii**

>relB|15668172:840765-840947, length 61, Methanococcus\_jannaschii, RelB  
MSIVQSYITDEKGNKGVILDYKTFKKIEELLLDYGLLKAMEEVENEEEDLETAKKLLEQ

>relB|15668172:c1043988-1044146, length 53, Methanococcus\_jannaschii, RelB  
MRLKRRFKKFFISRKEYEKIEEILDIGLAKAMEETKDDDELLTYDEIKELLGDK

>vapB|15668172:1445372-1445695, length 108, Methanococcus\_jannaschii, VapB  
MVQGPVVIPLISTLGLSFLAILLAYKISFSVIGFINSTLPTTLFPSKPYMLFVKISTISP  
LTCPSLIILTPALTWSLTALSMAVLYSSYPNTFFTLKSNVSSFLTGT

>vapB|15668172:c846334-846143, length 64, Methanococcus\_jannaschii, VapB  
MISAKSKTKRITITFEIPEDIDAKKFKDDVKRYVRYKLLANKLYELLEGENIEEIEEIEIR  
KRRE

>vapB|15668172:c1268398-1268213, length 62, Methanococcus\_jannaschii, VapB  
MNESIMQLLYDLTKMYSALYGEGRYLRIPAPIHYADKFKVKGKKNWKIDELLKHGFLY  
FI

**Methanopyrus kandleri AV19**

>vapB|20093440:1478697-1479293, length 199, Methanopyrus\_kandleri\_AV19, VapB  
MYIARSDVKNKPGTRPSDLKGGVIGGAIVQGEVEIGDEIEIRPGIRVERYGRTEWEPVYT  
EVVSLHANVTPVERARPPGLVIGITKLDPTMTKADRLSGQVAGEPDTLPPVRHELLEVE  
LLEFVVGTEEERKVEPIRINEVLMMLTVGTATTVGVVTSARDDEIEIKLKQVCAEEGEDRV  
AISRRIQRWRLIGHGVKIG

**Methanosarcina acetivorans**

>relB|20088899:3293160-3293339, length 60, Methanosarcina\_acetivorans, relB  
MTELELLKISDDDLFLKTKILEIEESLELIDSELHPIREEYKRLDEIKKQKRGNYFRKRI

>relE|20088899:3293349-3293555, length 69, Methanosarcina\_acetivorans, relE  
MRGKALRYSYEISRHLERLEKIQKDRERFEILLDKMSEILDNPHRFKPLMHDMEGLMV  
NLYLIGIY

>relB|20088899:1172771-1172992, length 74, Methanosarcina\_acetivorans, RelB  
MNAIIAIVTIMSETTTIQISKDRDELKAIGKMGDDYNTVIRKLIHEHNCNKLIIEGDRL  
IREHRDEFVSDIEL

>vapB|20088899:1173673-1173882, length 70, Methanosarcina\_acetivorans, VapB  
MIFMGSTAEIEKRLIELDKIEIHSILNMVRKKEGKSSKEIVESACGAWGYDVESEEFVDQL  
RKSSRLDWVE

>vapB|20088899:4548892-4549509, length 206, Methanosarcina\_acetivorans, VapB  
MDKPASMLIARSDINKPGASIDEIRGGVIGGTLTEGVLHPGDELEIRPGIKVTTTEGSTK  
WIPIVTTISSIYAGPTKVEEATPGGLLAVGTYLDPTLTKGDSLGTQIAGVPGTLPETRHQ  
FVMELHLLDRVVGVTREKINEIKTSEPLMLNIGTATTVGIVTSARKNEAQVALKRPISA  
AVGAMVAISRRLSRWRLIGVGIKS

**Methanosarcina mazei**

>vapB|21226102:726480-727034, length 185, Methanosarcina\_mazei, VapB  
MEEIRGGVIGGTLTEGVLHPGDELEIRPGIKVTTTEGSTRWIPILTTVSSIYAGATKVD  
EATPGGLLAVGTYLDPTLTKGDSLGTQIAGVPGTLPETRHQFVMELHLLDRVVGVTREKIN  
EIKTSEPLMLNIGTATTVGIVTSARKNEAQVALKRPISAAIGAMVAISRRLSRWRLIGV  
GVIKS

**Pyrococcus furiosus**

>vapB|18976372:765885-766256, length 124, Pyrococcus\_furiosus, corrected gi:33359506, vapB  
MKRRLGKVIPLYDPLEPHAVDMLTIETTNVIGKYMKKYKLITREQAIGLYKQMVKLIR  
EEVIMLEPGEKYLQEAALKIAMDYDISIYDGLFLAQARNLKAKLITSDKRQGDVAREIGVE  
VAYI

>vapB|18976372:1159756-1160004, length 82, Pyrococcus\_furiosus, VapB  
MFLSVHPNSITLKYDACIQCIMVSIKVTITISDDVYNELLRIKGNKSFSEVLRRELLKER  
KGNKEVLKRIFGILSEEEYQEVKKRLKELEGEFEKWEQSLTQM

>relB|18976372:841569-841447, length 41, Pyrococcus\_furiosus, RelB  
MWLIFAQNYCHNNKSLRKRYIVVNLTFHLVHKSHGALQEIS

>vapB|18976372:c1897570-1897358, length 71, Pyrococcus\_furiosus, VapB  
MIRSLRRLTMNHFLFVDSVVLVGLNLGDEKAKALVKSLIERGLTLVQSFSLKRLIRLCL  
PGPSRWIEGCL

>vapB|18976372:768291-768446, length 52, Pyrococcus\_furiosus, VapB  
MKGDEVVVEIEEGKVEILPRDVLDSKYVDSVEVDVDFGDIHELKREKK

>vapB|18976372:1146253-1146840, length 196, Pyrococcus\_furiosus, VapB  
MHANEILDGKDLPLLYVAFSPCFRKEAGTAGKDTKGIFRVHQFHKVEQFVYSRPEESWEW  
HERLVRNABEELFQELEIPYRVVNICTGDLGYVAAKDYIEAWMPGQGRFREVVSASNCTD  
WQARRLNIRFRDRTEKPRYVHTLNSTAIATSRAIVAILENHQQEDGTVKIPRALWKYTG  
FKEIVPVEKKEGCCKA

>vapB|18976372:c1596552-1596223, length 110, Pyrococcus\_furiosus, VapB  
MTKGDLMAGNVVKGPKLPVWTDLRLEVHLLERVVGTEQELNVPEIKRKEVLLLNVTGTA  
RTMGLVTALGKDEIELKLIQPVCAEPGERVAISRQIGSRWRLIGYGIKE

**Pyrococcus horikoshii**

>relE|14589963:928619-928915, length 99, Pyrococcus\_horikoshii, gi:33359355, relE

MSLREEYRRFKTSTGVSVKASIAXSILKELIKFSGEEPYWERVEGELKIKIKEYEAKVLLFL  
ESIGEIKIRRSKNGRRRLVLTLLKNLRKNPITLTKWIKVQ

>vapB|14589963:c372554-372781, length 76, *Pyrococcus\_horikoshii*, vapB  
MFGVGCCLKVVTIRVPEWVDEEKREIINMALAEISPRIMSINKLREILGVVEVEEIEISD  
DVYVREKEKERVKWLY

>vapB|14589963:631040-631294, length 85, *Pyrococcus\_horikoshii*, VapB  
MKTIAVDEETWEAIKRLKARLDAKSYDEVLLKLIQAWHTLELETKAESISLDDEEAELVL  
SVIKERGRFVQEGNKNSNASKNLL

>vapB|14589963:c351629-351390, length 20, *Pyrococcus\_horikoshii*, VapB  
MVIKVVCMIEVISFRIPSELKEMKIDINWSEEIRKFIKAEKRVREYKRKKALEEIDAMLEN  
LPRTEKGTARKYVREDRDSN

>vapB|14589963:c452910-452704, length 69, *Pyrococcus\_horikoshii*, VapB  
MKTIAVDETTWKKIKMLKDKMEARSYDEVLQKLIETWHLVELDKKVDKVMVNDDEEMKILM  
SILKKKKGS

>vapB|14589963:c632499-632206, length 98, *Pyrococcus\_horikoshii*, VapB  
MEAWMPGQKGFREVVASASCTDWQARRLNIRFRDRTEDEKPRYVHTLNSTAIATSRAIVAI  
LENHQEEDGTVRIPKVLWKYTGFKIIVPVEKKERCCAT

>vapB|14589963:c821653-821345, length 103, *Pyrococcus\_horikoshii*, VapB  
MAGLGVAVALKMSMEGFQIIVMMLMLPMMFLSGAFYPVRTMPNWMQWLAKINPLTYAVD  
GARYLAGVTPTFGIMQDWIVLILLALVLFAGFAGLEFRKAYLS

>vapB|14589963:c1168172-1168014, length 53, *Pyrococcus\_horikoshii*, VapB  
MRVQKTLAPGLIWNHPLINKPHTITPDFSGLSLPRKPLHHSSTPLYNKRRGK

>vapB|14589963:1501435-1501986, length 184, *Pyrococcus\_horikoshii*, VapB  
MYPWDIGWSGIFSPMGGEERFVGVVEFYRGGKFTVINPTPYKKGLFPYINGNSEWMMKELN  
DDLNLNLYMGAAMVNLALWSAWSKDNVLPQQGTWSDGTHSWEWETRPDGEITFSGVTFR  
VINAEWKYSGEPEGIKLSGNGKFAPEIFIPLSVEGWFSKDPKTGENIEIYGAYELQDIK  
LEEI

>vapB|14589963:965798-965962, length 55, *Pyrococcus\_horikoshii*, VapB  
MYFVHTCTYEVTSMKTTITADVVYELVKMGKRSFSEVLRELIGKKKEGISTY

#### **Pyrococcus\_abyssi**

>vapB|14518450:c447806-448138, length 111, *Pyrococcus\_abyssi*, VapB  
MNLALWSAWSKDNVLPQHGWSWDLHWSKWKNTNPDGNVLSGMTFRVVNAEWNYSGGPE  
NIDLSGKGRFSPKIPILYIEGRFYKDPETGEEVEVYGYELEDMKLEEI

>vapB|14518450:834293-834433, length 43, *Pyrococcus\_abyssi*, VapB  
MVIYLDANVIVGYLIYTDKTEIEKELLEKDEIFVTTINTLFWDEINL

>vapB|14518450:761684-761887, length 68, *Pyrococcus\_abyssi*, VapB  
MWLEALFLYGENMEVIKVEIPRELEEDVKRYIKLLKKRREVLKKTFGILKTEKTAKELKV  
EIYDELYD

>vapB|14518450:c898293-898093, length 67, *Pyrococcus\_abyssi*, VapB  
MKTIAVDEETWEAIKRLKAKLDAKSYTEVLKLIQAWHTLELETKAESISLDDEEAELVL  
SLLENSE

>vapB|14518450:c1009921-1009637, length 95, *Pyrococcus\_abyssi*, VapB  
MYQVHYMQIYGDINMNVKRIKIDSQGRIVLPKEWRKKGSEVILIELDDRIEILPRKKP  
KLEFFDIEVEDIGEDIEKDLLKELGEDINEVHR

>vapB|14518450:c1120616-1120338, length 93, *Pyrococcus\_abyssi*, VapB  
MVIRMTTKKVIQTEVDLGTHTLRAIAVHRGVLPKEVIREILRNYAETYKRELIKEI  
HEDPIWKGIGLLNTGDPRASEKDDWGVVWSSSE

>vapB|14518450:1136739-1136951, length 71, *Pyrococcus\_abyssi*, VapB  
MRKVKNVGVVITLNVDPGMEDVKSLLEREARVIMRRLSRADFKSTFGILKGRKRSVDE  
IEADIYDEWEV

>vapB|14518450:c1153817-1153542, length 92, *Pyrococcus\_abyssi*, VapB  
MASLINFRLKSHWMIIVTFGGHMSKVITIEVPEWVDEERLKTILNKVLMELSPKVMPVVK  
LREMLGVVELEEEITDHTYVREKEKERIKWLY

>vapB|14518450:1260427-1260705, length 93, *Pyrococcus\_abyssi*, VapB  
MVTSSVVSIRLVKPGKQIVIPKVFREAYGIKEGGEVIEPTDKGLVIKAPLDVKTLMKEL  
KERRKNMKGVGIQAKLGLDKVDLEDEFNEDIP

>vapB|14518450:1291316-1291903, length 196, *Pyrococcus\_abyssi*, VapB  
MHANEILDGKDLPLLYVGISPCFRKEAGTAGKDTKGFIRVHQFHKVEQFVYSRPEESWEW  
HERIIRNAEELFQKLEIPYRVVNICTGDLGYVAAKKYDIEAWMPGQGRFREVVSASNCTD  
WQARRLNIRFRDRTEDEKPRYVHTLNSTAIATSRAIVAILLENHQEEDGTVKIPKVLWKYTG  
FKEIVPVEKKERCCSS

>vapB|14518450:1501612-1501827, length 72, *Pyrococcus\_abyssi*, VapB  
MKTIAVDESTWKKIKMLKDKLEAKSYDEVLQKLIETWHLVELDKKVDKVVVKEEAETLL  
SVLNKIKKKGES

>vapB|14518450:c1699062-1698781, length 94, Pyrococcus\_abyssi, VapB  
MILLVSIIRLKVGPKGQIVIPKVFREAYGKKEGGVVLEPTDKGLIIRAPIRVDDLKIKIR  
EERKKMNPKRPRPKPGELRGISLEDEYEEWRSEE

**Thermoplasma acidophilum**

>relE|16081186:237926-238222, length 99, Thermoplasma\_acidophilum, Solitary RelE  
MEDNAFKEKWTVMNYIVESTETFEREFKFNHKDKKEWLQHMIERLEQEPQSGKPLRGKL  
HGLWQLRIGPFRVWYEINERERKVIILRAILHKDEAKKYY

>vapB|16081186:38670-38828, length 54, Thermoplasma\_acidophilum, VapB  
MTHVHFAGYRRWGIYKDLIAICWFEPVNIILLVVPDPLFFHLYVYIHSDL

>vapB|16081186:804192-804743, length 184, Thermoplasma\_acidophilum, VapB  
MSGYIARNTDIDIVLSSDYLRFLRPFAPQESHLETSVYDAWKFYGDMSDDNIIRGYLDQ  
ARPIMGGINRVIARALANGEDLIESLYFVPMDEMVLKNAFLAYVYIDDPDLHRSRLE  
DRINYTHRNSPGSRLAAHLKEYRTIMDYSDMARGRGIGLYSTDDYALARQLLDDFRKF  
VDRR

**Thermoplasma volcanium**

>vapB|13540831:c886266-885913, length 118, Thermoplasma\_volcanium, VapB  
MDRILIRAIENGENLILETLFLPEMLSEKARNNVHMFYLYIGDEKLHRDLVDRINYTH  
KNSPGTRLAEHLYEYRNIMEYSMMRSSEYNVKIIDTSNYEEARRTILEMIVKGESRYA

**Gram-positive Bacteria:**

**Bifidobacterium longum**

>relB|23464628:1638836-1638570, length 83, Bifidobacterium\_longum, RelB  
MPRMQTRSDGREGRGAAPVQVRQSHQRAAGAAREPRQGRGNTPDQDTGRHEPMAQGLLRV  
RGQPQADQQLAQPGQTPQLETRR

>relE|23464628:1638535-1638230, length 102, Bifidobacterium\_longum, RelE  
MEIKQSAEYRKWFKLRDHAKAKAIQARLDACKLAGRPFQDIKPVGGPVSEMRFHGTGAGY  
RVYFAMQGNVLMMLLAGGDKSTQQTDIRQAHDILNDYKEQRQ

>relB|23464628:1284380-1284766, length 129, Bifidobacterium\_longum, relB  
MRIRQAIWLSLRERPALSLPSSSPAMSIRPRSRVASSSSSMGAKEPSSSTWRWSVSSAS  
SMRCSSSAVRSPARPRARAWAREPAMSSSAKRQSNVDLDSRANSRSGDPDKRPPHRC  
SLFSVMKAP

>relE|23464628:1284736-1284981, length 82, Bifidobacterium\_longum, relE  
MFVLSHEGSLKPWIANKSDCLSDYQRWATYRWIQVVRIPWRQCQGYWSRRIDEKNRIVY  
RITGNDVQNLIAVCRTHYGEH

>vapB|23464628:391589-391864, length 92, Bifidobacterium\_longum, VapB  
MIRRLREDPVQAQKADAHDAYPPFFMAYLITRASKTTAPHASIMTATRRCIMATLTIR  
KIPDEQIQQLKEVAEKNRSMESQVRSILEEWLAGTVAHEITRKTNFYDEIREFMKNMDF  
EGLDKGELPLSERNSADSRPPVSFE

>vapB|23464628:c1248957-1249274, length 106, Bifidobacterium\_longum, vapB, a relB/dinJ homolog  
MTMAMVTARVNAERKRDAEKVLRNGRTYSDLIRDLTDYLDADTGLPEFERLTLSLIQER  
ERRKKQELIQRFADRNLPEAEGDLSDEEILAQARMERFGRDETAV

>vapC|23464628:c1248539-1248970, length 144, Bifidobacterium\_longum, vapC  
MKLLFDTNILLDLNDKRAPFHKQCVDLLMEAVAQPNIEIMAPVSSLNDVYCVLRKHIGE  
ERAARDIGGLMELFDIRPLMERHACMSYRSDEPDFEDGLIRAVAEDNDADVIVTRDVEA  
FHHSSVRSMDAEQCRALLLADSKA

**C. glutamicum ATCC 13032**

>higB|23308765:1085499-1085777, length 93, C.\_glutamicum\_ATCC\_13032, upstream HigB toxin  
MIRSFADRTELWVLRREGAKRVDPRIHKVANRKLHLLDAATTLDALRVTPGNRLETLEGD  
RVGQYSIRVNDQWRICFRWNDSGPENVEIVDYH

>higA|23308765:1085714-1086001, length 96, C.\_glutamicum\_ATCC\_13032, downstream antitoxin HigA  
MADLLPLERLGPKRDRGLSLRRRRLRSSTRFTLVRFVSWRTSSRASASHRTRSPYRS  
GCLRDASTRSCTASDPSRPIRLCVSGGTSVSTRSSG

**M. tuberculosis H37Rv**

>parD|15607142:c2402508-2402720, length 71, M.\_tuberculosis\_H37Rv, ParD  
MNVNRALLASVDALSRDEQIELVEHINGNLAEGMHISEANQALIEARANDTDDAHWSTID  
DFDKRIRARLG

>mazE|15607142:c547345-547515, length 57, Mycobacterium\_tuberculosis\_H37Rv, mazE  
MTTYVVLLSVTTWVGLRHEAKRELVYRGRRSIGRMPREWACRRSRRFAANGVDAAR

>mazF|15607142:c547077-547355, length 93, Mycobacterium\_tuberculosis\_H37Rv, mazF  
MLRGEIWQVLDLPARGSAANMRRPAVIVSNDRANAAAIRLDRGVVPPVPTSNTEKVPPI  
GVVAGSERWPGRRFEGAGPAGWIRRCATSPPLPS

>mazF|15607142:2320829-2321059, length 77, Mycobacterium\_tuberculosis\_H37Rv, mazE  
MSTSTTIRVSTQTRDLAAQARERGISMSALLTELAQAERQAIIFRAEREASHAETTTQA  
VRDEDEWEGTVGDGLG



>mazF|15607142:2321055-2321462, length 136, Mycobacterium\_tuberculosis\_H37Rv, mazF  
MAEPRRGLWLVSLGAARAGEPGKHRPAVVSVDELTLTGIDDELVVVVVSSSSRSRTPLR  
PPVAPSEGVAAADVAVCRGVRAVARARLVERLGALKPATMRAIENALTLILGLPTGPERG  
EAATHSPVRWTGGRDP

>mazE|15607142:3110734-3110507, length 76, M.\_tuberculosis\_H37Rv, MazE  
MKLSVLSLDDDDVAILDAYVKRAGLPSRSAGLQHAIRVLRVPTLEDDYANAWQEWSAAGDT  
DAWEQTVGDGVDAPR

>mazE|15607142:2234919-2234644, length 92, M.\_tuberculosis\_H37Rv, MazE  
MEVLPGYTICMKTALSLPDETFDRVSRRASELGMSRSEFFTKAAQRYLHELDAQLLTGQI  
DRALESIHGTDEAEALAVANAYRVLETMDDEW

>mazE|15607142:2547085-2546840, length 82, M.\_tuberculosis\_H37Rv, MazE  
MAEPETLPGRWLPEACLAETVSWEQSRLWSRLLCRPHFRHALPGLTGGSASRPSARSAR  
LVRQPRMTLFSLDHRDGDVARD

>mazE|15607142:c1231289-1231056, length 77, M.\_tuberculosis\_H37Rv, MazE (gi|put\_here corrected start)  
MYLPWGVVLAGGANGFGAGAYQTGTICE VSTQIAVRLPEIVAFIDDEVRGQHARSRAAVVLRALERERRRRLAERDAEI  
LATNTSATGDLDTLAGHCARTALDID

>mazE|15607142:c2195345-2195109, length 78, M.\_tuberculosis\_H37Rv, mazE (gi|put\_here corrected start)  
MKTARLQVTLRCAVDLINSSSDQCFARIEHVASDQADPRPGVWHSSG MNRIRLSTTVDAALLTSARDMRAGITDAALIDE  
ALALLARHRSAEVDASYAAYDKHPVDEPDEWGDLASWRRRAAGDS

>higB|15607142:2201741-2202091, corrected start, length 117, M.\_tuberculosis\_H37Rv, HigB  
MGTWKFFRASVDGRPVFKKEFDKLPDQARAALIVLMQRYLVGDLAAGSIKPIRGDILELR  
WHEANNHFRVLFRRWQHPVALTAFYKKNQKTPKTKIETALDRQKIWKRAFQDTPPI

>vapB|15607142:71575-71823, length 83, M.\_tuberculosis\_H37Rv, VapB  
MNSAMATIQRDLPEVAETVYRRRATAAGQSLQTYMRTKLEIGVVRGRDKAEAIIELEQAL  
ASTASPGISRETIEASRRELGG

>vapB|15607142:1073325-1073543, length 73, M.\_tuberculosis\_H37Rv, VapB  
MKTLYLRNVPPDDVVERLERLAELAKTSVSAVAVRELTEASRRADNPALLGDLDPIDGIDTT  
ELIGGIDAERAGR

>vapB|15607142:3174744-3174989, length 82, M.\_tuberculosis\_H37Rv, VapB  
MLSDEEREAFRQAAAQMSLSNWLRLQAGLRQLEAQRQRPLRTAQELREFFASRPDETGA  
EPDWQAHLQVMAESRRRGLPAP

>vapB|15607142:c2506381-2506208, length 59, M.\_tuberculosis\_H37Rv, VapB  
MALWYQAMIAKFGEQVVDKAVWAPAKRVGVHEAKTRLSELRLRVYGGQRLRLPAAASR

>vapC|15607142:c2506381-2506208, length 139, M.\_tuberculosis\_H37Rv, VapC  
MT MACTACPTIWTLCRQTTCSNAFTGREALPHRHPRLAADAVNETRAIVQDVRNSILLSAA  
SAWEIAINYRLGKLPPEPSASYVPDRMRRCGTSPLSVDHAHTAHRRASGSPSTSIRPCA  
HRPGTAAWPDHRRRPVSL

**M. tuberculosis\_CDC1551**

>relB|15839372:c1388510-1388731, length 86, M.\_tuberculosis\_CDC1551, RelB  
MPTTWRSPRQRHATCNAYPKRSPHVSSLSFSDRCLTTRIGWASRCAMTLKASTQPAAVIT  
ASSTPSTTATTESRSSTSLVAVPATE

>relB|15839372:3171692-3171970, length 93, M.\_tuberculosis\_CDC1551, RelB  
MRILPISTIKGKLNFEVDAVSSTQDQITITKNGAPAAVLVGADEWESLQETLYWLAQPGI  
RESIAEADADIASGRTYGEDEIRAIEFGVPRRPH

>relE|15839372:3171947-3172237, length 87, M.\_tuberculosis\_CDC1551, RelE  
MRRPATPPLSGALHRAVHNRASRPPQAATANPRGSGRIRVRRSVARAPAGGQAPSARVG  
RHVQRASRNVPVAVPD

>mazE|15839372:c2544045-2544290, length 82, M.\_tuberculosis\_CDC1551, MazE  
MAEPETLPGRWLPEACLAETVSWEQSRLWSRLLCRPHFRHALPGLTGGSASRPSARSAR  
LVRQPRMTLFSLDHRDGDVARD

>vapB|15839372:719471-719728, length 86, M.\_tuberculosis\_CDC1551, VapB  
MVGMSSEVASRELNRNDTAGVLRVRVAGEDVTITVSGRPVAVLTPVPRRRRWLSKTEFLSR  
LRGAQADPGLRNDLAVLAGDTTDLGPIR

>mazE|15839372:3105455-3105228, length 76, M.\_tuberculosis\_CDC1551, MazE  
MKLSVLSLDDDDVAILDAYVKRAGLPSRSAGLQHAIRVLRVPTLEDDYANAWQEWSAAGDT  
DAWEQTVGDGVDAPR

>vapB|15839372:363648-364106, length 141, M.\_tuberculosis\_CDC1551, VapB  
MPIHSGPGRGSLGDGGGGRATQRHAAAGTRAVASCCRARCATRQRGRPRTRGCLGRDS  
SALLALSPAKIPDIARYHRKMSDVLIRDIPDDVLASLDAIARLGLSRTEYIRRRLAQDA  
QTARVTVTAADLRRLRGAVAGLGDPELMRQAWR

>mazE|15839372:c2192678-2192442, length 78, corrected start, M.\_tuberculosis\_CDC1551, MazE  
MKTARLQVTLRCAVDLINSSSDQCFARIEHVASDQADPRPGVWHSSG MNRIRLSTTVDAALLTSARDMRAGITDAALIDE  
ALALLARHRSAEVDASYAAYDKHPVDEPDEWGDLASWRRRAAGDS

>vapB|15839372:71570-71806, length 79, M.\_tuberculosis\_CDC1551, VapB

MATIQRDLPEVAETYRRRATAAGQSLQTYMRTKLIEGVRGRDKAEAEIEILEQALASTA  
SPGISRETIEASRRELGG

>vapB|15839372:c2503593-2503357, length 79, M.\_tuberculosis\_CDC1551, VapB  
MGACEAGRSRGEDTPVRAAAARLRRAEVEIARRGEPVAKLVPLHHPHETRRLGIDHGVYR  
VPDDLADPLSDDVLERFHR

>vapB|15839372:c2866266-2866541, length 92, M.\_tuberculosis\_CDC1551, VapB  
MRFSATDVYSIMLVAYICHVKRLQIYIDEDVDRALAVEARRRRTSKAALIREYVAEHLRQ  
PGPDPVDAFVGSFVGEADLSASVDDVVGKHE

>vapC|15839372:c2865871-2866266, length 132, M.\_tuberculosis\_CDC1551, VapC  
MIFVDTSFWAALGNAGDARHGTAKRRLWASKPPVMTSNHVLGETWTLNRRRCGHRAAVAA  
AAIRLSTVVRVEHVTADLEEQAWEWLVRHDEREYSFVDATSFVAVMRKKGIQNAYAFDGF  
SAAGFVEVRPE

>vapB|15839372:c3131225-3131449, length 79, M.\_tuberculosis\_CDC1551, VapB  
MTRKMTATEVKAKILSLLDEVAQGEIEITKHGRTVARLVAATGPHALKGRFSGVAMAAV  
DDELFTTGVSWNVS

>vapC|15839372:c3130833-3131225, length 131, M.\_tuberculosis\_CDC1551, VapC  
MTTVLLDSHVAYWWSAEPQRLSMAASQAIEHADELAVAAISWFLAWLAEQERIQ  
AIPVLSWLQQLAEHVRTVGITPSVAATAVALPSSFPDPADRLIYATAIEHGWRLVTKDR  
RLRSHRHRPVTVW

>higB|15839372:2199074-2199424, length 117, corrected start, M.\_tuberculosis\_CDC1551, HigB  
MGTWKKFFRASVDGRPVFKKEFDKLPDQARAALIVLMQRYLVGDLAAGSIKPIRGDILELR  
WHEANNHFRVLFRRWQHPVALTAFYKNNQKTPKTKIETALDRQKIWKRAFQDTPPI

**Chlorobium tepidum TLS**

>mazE|21672841:947841-948164, length 108, Chlorobium\_tepidum\_TLS, MazE  
MLLEGSIGLLPDALLNNEEPEQNTGYNSSARCIVNREDQAGITRKETIGASVWFGLVCVT  
DESVAIRYDGLAARSLRLWTPSLKQQAIAKAGTHEKGIGGHDCLAGQ

**Nostoc sp\_PCC\_7120**

>relB|17227497:c181989-181630, length 119, corrected start, Nostoc\_sp\_PCC\_7120, RelB  
MLSNTYTYTQARDRLSELCDKVTSEDFVITRRAENVALIPVDELSSLETAHLRLSPRNERLLRAL  
DRAKSGVVESQSLDDIRKELGFDQKEESQKPIKRRSSNSKAKKNSVST

>vapB|17227497:c3788612-3788415, length 66, Nostoc\_sp\_PCC\_7120, VapB  
MRDRFNLPQILIIKPYVKLVMLLIDTSVWISVFRNRSGQVRQLETLVANRQNSLGSPL  
NCKKV

>vapB|17227497:5499145-5499573, length 143, Nostoc\_sp\_PCC\_7120, VapC (start corrected)  
MSIKYLLDTNIISEATRQSPNVNVVKKLTQHLELTATGSMHHELLFGCLRLVESQKRRLL  
LLEYINQIPLKMTILNYDLKAAQWHAQERARLSKMGKTPAFIDGQIASIAYSNNLILVTN  
NVSDFFESFNDLAVENWVNSGEG

**Synechocystis\_PCC6803**

>relE|16329170:1620536-1620793, length 86, Synechocystis\_PCC6803, relE/yoeb  
MKEVVLDSQAIEDIKWVIQDQKLLALKIMELIETLPKSPFAGKGPKEKLRFNLSGFWPR  
ITQEHRLVYEVTDDFIRVSCRYHYR

>relE|16329170:2074933-2075211, length 93, Synechocystis\_PCC6803, relE/yoeb  
MTRFIGTVKIAFTELSWHDYLFQNDKLLKRINLLIKAIARDPFDGIGKPEPLKANLS  
GYWSRRINSEHRLVYTIADRDLLIISCRFHYQR

>vapB|16329170:c2516782-2516531, length 74, Synechocystis\_PCC6803, VapB  
MDTKSKLRSNPMTDTALLEKINALPDAMKIEVEHFVFLTKQPPVSPVTNDGQKRYRQA  
GVLKGIWMADDFDAPLEMQEYM

>vapB|16329170:c3044422-3044670, length 83, Synechocystis\_PCC6803, vapB  
MEQNRMKQITPTELRGNLNYLLDEVLATGIPLEINRGKRLRILPVEEPDKFKNLVHRPG  
VIIGDPEELVTIDWEGEIEIDLDP

>vapC|16329170:c3044058-3044501, length 148, Synechocystis\_PCC6803, vapB  
MVQGLSLATRSWSPLIGRERLSSIIYLDTHIVVWLYCGLTEKFSSLAKSLINSNDLTFSP  
IVRLELKYLLIEIERITASPEAILTLENNIGLCSCTKNFQVVYQALTLTDWTRDPDRLI  
TAQSALTDSELLLTKDQKILAHYDARWS

>higA|16329170:c474208-474432, length 75, Synechocystis\_PCC6803, HigA  
MNTAQISTDGTHQIVILPENFTIAGSEVYIKKIGSTIILIAKNPNWQSLIESLDQFSDDF  
MKTREQPPLDIREEF

>higB|16329170:c474514-474792, length 92, Synechocystis\_PCC6803, HigB  
MKIAWSPKSLRSFKRLIPKNPNLRPMIEQILHQLATDPFHPSLRTHKLGELANVWSCSID  
YNYRLLFEFVNNPEDKEEAIIILNLGSHDEVY

**Clostridium tetani\_E88**

>phd|28209834:2057179-2057481, length 101, Clostridium\_tetani\_E88, Phd  
MILGLIYPKIVYNIITIEEVLFMQVNNINLVSISEANQNF SRVARMVDENGAAIILKNNAP  
RYVLIDYSKFQDQTIADDATVEEAANNILNKHLKAFEELAK

>mazE|28209834:c2670080-2670397, length 116, Clostridium\_tetani\_E88, MazE

MAGSKRVGVSLSETLNNEFNKALKEDSKKRSEFIRELIILYIEDKKKLREIEQMKGYLE  
MGKLNLEIAEVGFASDINSLKEYEAKLSESDWSDNDSEKRRYILC

>mazF|28209834:c2669764-2670117, length 118, Clostridium\_tetani\_E88, MazF  
MTTIVKRGDI YYASLSPVVG SEQGGIRPVI IIQNDVGNRY SPTVIVAAITSQ INKAKLPTHV  
EISSEYGLN KDSVVLLLEQI RTLDKRRLKE KIGRMTNGDM RKVDDALLVSIG LKEK

**T. tengcongensis**

>relB|20806542:867887-868186, length 99, corrected start, T.\_tengcongensis, relB  
MISVSDLRGKASKIIEKVAKKKEHYIVVKNKPKQAVIPIEYDELIEAQEDLELLQLAIERTKNLKEG  
ETLPEFEILKEDGLTKEELKKYIDIVEIE

**Streptococcus mutans UA159**

>relE|24378532:44407-44676, length 90, Streptococcus\_mutans\_UA159, relE, gi corrected:24378568  
MLYTIVILAIIGILKLFQFFINLLKSPQAGFSFWFEKLMVLTIQDSKALIGNIKDFWHYRV  
GHYRIICRIEDEGLIIVAINGGHRKDVYKK

**Streptococcus pyogenes**

>parD|15674250:448399-448676, length 95, corrected start, parD [Streptococcus pyotoxin or antitoxins]  
MAKTGTLNLRVDDSVKSAADDILKRLGIPMSTADMFLNQIILTGGIPFDVSLPEAPQRVNVVYMSQEKF  
YDKLITSFEDAKTCPQDVGKGYFYFQ

**Others:**

**Aquifex aeolicus**

>vapB|15282445:203338-203605, length 91, Aquifex\_aeolicus, VapB  
MICMVGKDEIVVKVLPKQGITLTKRIRKLGIREGDILIVEEKEGKLEIRKPKSLRDFYQ  
FLKGKKSINRENIERVIEVVKERELEKDSR

>vapC|15282445:203579-203860, length 94, Aquifex\_aeolicus, VapC  
MNLKKIVDTSVFIIRLFTNRDEKFFEKAEKLIIDASKGKIQLFVFPFIVVAEIVVWLEKVV  
KVNRENIRDVVEALINTRPRSNSYSIGKLYSFFYY

>vapB|15282445:1338522-1338839, length 166, Aquifex\_aeolicus, VapB  
MNKRFEQVDRKFEQVDRKFEQINNELNRLIQIMVGI FAGQIALVAAVIGFAWDRRTIIR  
KSKEETFEEMEKELRPEKFKKLLNALREKAKTDKELEAILKKYGLL

**Bacteroides theta VPI 5482**

>higB|29345410:5572334-5572546, length 71, Bacteroides\_thetaiotaomicron\_VPI\_5482, higB  
MLAGGCGWLKGLKRLKIKKHSNMIYGAFFIFDEGNIVMLFNGFQKKTQKTPSEIEKAV  
KLKNEYAYASKP

**Gram-negative bacteria:**

**Caulobacter crescentus**

>relB|16124256:3102767-3103121, length 96, corrected start, Caulobacter\_crescentus, RelB  
MALTTITIPAE LASRLRASAEAGKDVDAIDAIDALHVMSDEDEWGYTDDDAYWRELAHSDEVRRDGGIPL  
EDVWRVWASWDTENELPPPEPRIKARG

>relB|16124256:3371212-3371388, length 59, Caulobacter\_crescentus, RelB  
MAEPDPDIFDEDEDEAILAADAADADFEAGRTVPHERVGEWLKTLGTPHQTPPPYSWRK

>parE|16124256:1186395-1186610, length 72, Caulobacter\_crescentus, parE  
MRVTWTDASRDLRFAYAWIAQDRPTAALKQVRRIWFEFAKLSDFPNLGRPGRRPGTRNW  
SCRAAPSLSLTE

>parD|16124256:c2971506-2971288, length 73, Caulobacter\_crescentus, ParD  
MMNKPAPAAADDVDFGRPLTPAEEDTWFHNRREAIQQLVDEAWAEFERGEYDERSFAE  
IIAQGVAEHNKR

>phd|16124256:3613915-3613552, length 121, Caulobacter\_crescentus, Phd  
MAFEEGFELVGDVGDIGHDAGMRERALAVKAVRYNVCSNVWSAAMIALKLSQIGNSVG  
VVLKPEALVKLVGVEKGDITLYLTDAPGGMQIAPYDPDVARQIALGEEIMDEYRDTFRALAK

**A. tumefaciens Cereon C58 circ chr**

>relB|15887359:c831117-830842, length 91, corrected start, A.\_tumefaciens\_Cereon\_C58\_circ\_chr, RelB  
MKTATIPSLRVTADFREAESVLKDGTEL SAFMEEAVRKQVEIRKSQAEFIKQGLAAREESKRTGVYHKA  
EDVLAELKAMLDEKLAEDNDK

>relB|15887359:c1769363-1769118, length 81, corrected start, A.\_tumefaciens\_Cereon\_C58\_circ\_chr, RelB  
MTAFTVRLPDEVAEKLDQLAEKLDERSYMAVQAIEDFVAREEWQLAEIEAGLAADRGEFGTPEDLAN  
IVGRYVKTARPL

>relB|15887359:c1979782-1979531, length 83, corrected start, A.\_tumefaciens\_Cereon\_C58\_circ\_chr, RelB  
MANVRFTEFRQNFATHFDRVLETRAPLLVTRQKGAVVVLAEGEYESMQETLHLLSNPANASRLRASMGE  
LERGDTIERDPTEE

>mazE|15887359:928764-929030, length 88, corrected start, A.\_tumefaciens\_Cereon\_C58\_circ\_chr, MazE  
MKMCYICCTMQERRRMTVTTKIRRQGAAMVTIPPALLKMLGLEIGEQLTLEVDNGALVASPVRLEKKRFTLAELLDGAE  
EVALNARERAWDTAPPVGEAL

>parE|15887359:c1070511-1070861, length 117, A.tumefaciens\_str\_C58\_Cereon\_circ\_chr, parE  
MSNAFPSPKRGPIIKIRTPITWTRARRDLAEDHAYIETENPVAADRLVLDIYNKIESIA  
AIGLTGVSRRHGYGTGLRSIAYRDRVIFFRVNNGELTVMRVLHGHQDISADDFKQEEEN

>parD|15887359:1304512-1304808, length 98, corrected start, A.\_tumefaciens\_Cereon\_C58\_circ\_chr, ParD  
MPTRNVVLTQHHEEIIDDLVKSGRYQNASSEVLRGLRLIERRERLEATRLKVAQQGFCDLDQGRYI  
DVSDDALDDFISAFGREAEVRLTKSDDK

>vapC|15887359:c1001393-1001007, length 129, corrected start, A.\_tumefaciens\_Cereon\_C58\_circ\_chr, VapC  
MIVVDTSVWIDWFQNKQTPQVATLSDINDLSDVIIGDIIILLEILQGERNERRAAIESRL  
KVFELVSMILTPEFAVAAAANYRKLRLGLKTVRKTADLIIGTYCIEHGHKLLQNDRDFQPM  
ADHLGLQFV

**A. tumef. C58 Washn cir chr**

>relE|17933925:c809884-809573, length 104, A.\_tumef.\_C58\_Washn\_cir\_chr, RelE (starts at ATG or GTG codon)

M VTTKLVWTPRARSDVKKIYVDIGKSQPLAAERYFARFRAKAESLIDHPLGERHPEIFP  
SARMLVEAPYVILYETVPDTDDDEIRCVEIVRVNDGRRDLRTL

>parD|17933925:c830914-831318, length 135, A.tumefaciens\_\_str\_C58\_U\_Wash\_circ\_chr, parD  
MIWCSADVKPVYLPQGFADLSLPMTDLHRNCNAGRSMKTATIPSLRVTAADR  
EAAESVLKDGETLSAFMEAVRKQVEIRKSQAEFIKQGLAAREESKRTGVYHKAEDVLA  
LKAMLDEKLAEDNDK

>parE|17933925:c830618-830914, length 99, A.tumefaciens\_\_str\_C58\_U\_Wash\_circ\_chr, parE  
MTFQVFLADRARDNITRLYAHLLRQDKYAAKRAYRAIEKGIAALADFPSCRKVAENPF  
LREFLIPFGSSGVVLFIEESAQVTLAIRHQREDDYH

>parD|17933925:1304610-1304918, length 103, A.tumefaciens\_\_str\_C58\_U\_Wash\_circ\_chr, parD  
MVEAPMPTRNVVLTQHHEEIIDDLVKSGRYQNASSEVLRGLRLIERRERLEATRLKVA  
AAQQGFCDLDQGRYIDVSDDALDDFISAFGREAEVRLTKSDDK

>parE|17933925:1304918-1305289, length 124, A.tumefaciens\_\_str\_C58\_U\_Wash\_circ\_chr, parE  
MTTYRLSDAAQSDIIEILGWTHATFGAAARKRYEKLLATALRDVAVDPLRAGTNIRAE  
EDVRSYHLRYSRERAKSETGLVKNPRHLLYRALRPLGVGRVLHDSMEIERHLPDDY  
DITF

>vapC|17933925:c2105391-2105804, length 138, A.tumefaciens\_\_str\_C58\_U\_Wash\_circ\_chr, vapC  
MSDGFLLDTCAVIWMQGEFVSDEAVSALNQSYRAGDPVCVSAVTAWEMGLVAKGRIS  
TKSPQRWYDDFKREAEVIEQPVTADIFIASCFLPQLVHKDPIDRILITTAREHDLTIIT  
DRVILAYGEAGHVKTALC

**Bradyrhizobium japonicum**

>higB|27375111:1797159-1797353, length 65, Bradyrhizobium\_japonicum, HigB  
MLTAARLIRAPSLMKFYSTSGSLRPRLQKRWDSRQHLHDILAEEKPVSPNVAARIGKPVG  
NGPAI

>higA|27375111:1796750-1797079, length 110, Bradyrhizobium\_japonicum, HigA  
MTTTRIGRSQRLAISCDLRQYGRATSGEPAASTRECTSASRSHPCRAIGVRLDTLNEAV  
NSSELKLTGNDPFHKLAKGKSVRYTIHINGPWCITFEFEGGDAFKVDQFEQYH

>higB|27375111:2290771-2291367, length 124, Bradyrhizobium\_japonicum, corrected start HigB  
MDRIGEVVDGQWRKFAIYRVPVKPLQNYSSSAIREGR MTTQKPVVWIGSSKDDLRAFPDEVRRVMGFAINDAQNGDEHPR  
AKALKGFGGRSVLEVIDDEGDTFRVAVYTVRFAGVIYVLFHAFQKSKKGIETPKHDILVIQARLKAAEAHYQENYKGGK  
K

>higA|27375111:5539812-5540207, length 132, Bradyrhizobium\_japonicum, HigA  
MTTQKPVVWIGSSKDDLRAFPDEVRRVMGFAINDAQNGDEHPRAKALKGFGGRSVLEVID  
DEDGDTFRVAVYTVRFAGVIYVLFHAFQKSKKGIETPKHDILVIQARLKAAEAHYQENYK  
GGKK

**Brucella melitensis chr II**

>mazE|17988344:197880-198089, length 70, Brucella\_melitensis\_chr\_II, MazE  
MEAEITPREGRRTSRSFARLRFALDPLDLAGRAFSSFRDEAHRQSLTVASRSHAADDLAF  
INSVSDWSDE

**Brucella suis chromosome II**

>mazE|23499767:1101529-1101320, length 70, Brucella\_suis\_chromosome\_II, MazE  
MEAEITPREGRRTSRSFARLRFALDPLDLAGRAFSSFRDEAHRQSLTVASRSHAADDLAF  
INSVSDWSDE

**Mesorhizobium loti**

>higB|13470324:4800860-4801012, length 55, Mesorhizobium\_loti, higB  
MTGEMTSGNVFADLGFNDSEELSKAKLAVRSAPSLCVGASLKRNLNCLL

>higA|13470324:4800572-4800853, length 94, Mesorhizobium\_loti, higA  
MSASSWVLQSTMPKMASSILGVKALKRFGGRILAVVDDLDRLIARPCRRFAGVICIFAS  
RRRAGTRPSAKSISLQRLKVAGTHDRENYKGGHD

>relB|13470324:250975-251220, length 81, Mesorhizobium\_loti, RelB  
MAMTAFTVRLSDDTTDRDLQLAEKLDLRSRYVAAQAIEDFVTRQEWQLAEIEAGLAEAE  
GEFANEQELAAVIAKYIKPAG

>relE|13470324:251223-251513, length 97, Mesorhizobium\_loti, RelE  
MSHKTIRWTKRALRRLDEIGAHIEKDSPEAASRVIAARILSAAELTQPPAMGRVGRKAT  
RELVLVDIPYIVPYRVSNTVEIILTVIHAAQQWPRTL

>parD|13470324:1972578-1972823, length 82, Mesorhizobium\_loti, parD  
MMAMTAFTVRLSDDTTDRLDQLAEKLDLRSRSYVAAQAIEDFVTRQEWQLAEIEAGLAEAE  
RGEFANEQELAAVIAKYIKPAG

>parE|13470324:1972805-1973119, length 113, Mesorhizobium\_loti, parE  
MYQARRLIVSHKTIWTKRALRRLEIGAHIEKDSPEAASRVIIARILSAAELLTQQPAMG  
RVGRKATRELVLVDIPYIVPYRVSGNTVEILTVIHAQQWPRTL

**S. meliloti\_1021\_chr**

>relB|15963753:c1588987-1588739, length 83, S.\_meliloti\_1021\_chr, RelB  
MRHPRNGLRPPGPRDLHGPGDRRTELAGRVLRQSSARADQAVPQPPALIRNNSKRR  
RPAFMAGRFLVLSKPKPRRNSPF

**Neisseria meningitidis\_MC58**

>phd|15675948:c929630-929475, length 52, Neisseria\_meningitidis\_MC58, Phd  
MPANRQGAAMQNQTRPVKIELKGEAGKRVLLAAARRIAKTHQKAVKALADK

**Nitrosomonas europaea**

>higB|30248031:c1156617-1156871, length 85, Nitrosomonas\_europaea, higB, also hits into relE  
MNRIIWTKAIKQVLKLRQTAQVIRDVVEEKLSVFPDCNSIKKLTNHRYPYRLRAGDYR  
VFFDFDGEIHIINIQQEVKKRDETTY

>higA|30248031:c1156304-1156630, length 109, Nitrosomonas\_europaea, higA  
MRPLTNYQTINDVDGRPAFVVIYADFVHSQVYVPKDGAPHAVVSKAINGMSMLQAWREY  
LMLTQEEMAKRMEITQAGYAQIEAAKRPRKATLEKAAAAMGITLEQLAY

>relB|30248031:1479043-1478798, length 82, Nitrosomonas\_europaea, RelB  
MYMAILNATEARARLYALIDEAAETHQPIVIKGRSSAVLLSEEDWNAINETLYLVSIPG  
MRESIMEGMKTDVDECSRRLDW

>parD|30248031:1479335-1479618, length 88, Nitrosomonas\_europaea, parD  
MKSSTIPSLRVTPFEFRDAESVLRREGESLSAFVEESLRQHIERRRTQQEFIARGLTAREA  
AKSSGQYASKAEVMSLHLSILDEQRSKE

>mazE|30248031:c1427432-1427208, length 74, corrected start, Nitrosomonas\_europaea, MazE  
MNSHRGQMMSKDATALLHVTCVFRHNACNASGGLHMGTTNHNARVKKHRDTLRMAGLRPVQIWPDPTRRPDFAEECRRO  
CLLIAQADKADTSMQQFMDEALADSDGWTE

>mazE|30248031:1002936-1002703, length 78, Nitrosomonas\_europaea, MazE  
MKMTIIAKVTSKQTTIPADIRAALRIKPGDLIIWEMSDDGARSIRRVQPLDIEYLKAVE  
GTLSEWAGAADEEAYREL

>parD|30248031:1655892-1656143, length 83, corrected start, Nitrosomonas\_europaea, ParD  
MATVRKTIISLTNQDQAWITAQVEAGRFTNDSELIRDLIRREQERMAEIDNIRAALIDGEGSQGEPQPFDFD  
QFKRHKLAAQHKPG

>phd|30248031:1386749-1386501, length 83, Nitrosomonas\_europaea, Phd  
MVITLGYEMIELKVRKFGNSLGIIVLPKEVNVNHLRTGDGQRLFLTEASDGRYLITPYDPSF  
GEMAKVEDICNRYRNTLHVLTG

>phd|30248031:2674530-2674754, length 75, Nitrosomonas\_europaea, Phd  
MVELKVRKLGNSLGVVLPKEVINHLRTGDGQRLFLTEASDGGYLLITPYDPAFEEMKVKVE  
NICDRYRNTLRILAK

>vapB|30248031:1155550-1155774, length 75, Nitrosomonas\_europaea, VapB  
MGHRRCGSGVPPPLARTGTACGLHMLLLDNTNVISELLKVRAGKADPHVTTWGRTPVGASL  
YVSVITVQELEIGTL

>vapB|30248031:2296994-2297218, length 75, Nitrosomonas\_europaea, VapB  
MKNIPDDVYERLKAEEIHRRLNSEIIVCLETVLMPTRISPSERLERARQLRAGLNPKE  
FQACDIAIMKRQGRP

>vapB|30248031:c316448-316260, length 63, Nitrosomonas\_europaea, VapB  
MASTFRLLSLLCCIARRTAAVVRALPCNICPIIPPVSVANHTIHHNAGPNNYLLIRRAWN  
SER

**Helicobacter pylori\_26695**

>relB|15644634:c946969-946688, length 93, corrected start, Helicobacter\_pylori\_26695, RelB  
MQNDRISFKKMAKLEKRDQNFKDKIDALNELLQKISQAFDDKRDCCLGHEIPNIETQQAMRDVGNKET  
DLIVEDFSSYSNERKRALGVEAQS

>relE|15644634:1067530-1067742, length 71, Helicobacter\_pylori\_26695, relE  
MTESDVTSIVDCLKQKQKPLQKQYCDHALSGNLKGLRECHVKPNLLLIYEIKKQENELVLL  
RLDTHSELFFK

**Escherichia coli\_K12**

>yoeB|16127994:c2087233-2087487, length 84, Escherichia\_coli\_K12, RelE/YoeB, new gi|33347611  
MKLIWSEESWDDYLYWQETDKRIVKINELIKDTRRTPFEGKKGPEPLKHNSGFWSRRI  
TEEHLVYAVTDDSLIAACRYHY

**E. coli\_O157\_H7\_EDL933**

>relE|16445223:c283932-284192, length 88, E.\_coli\_O157\_H7\_EDL933, RelE/YafQ  
MLNSGQFSKDVKLAQKRHKDMNKLKYLMTLLINNTLPLPAVYKDHPLQGSWKGYRDAHVE  
PDWILYKLTDKLLRFERTGTAAALFG

>parE|16445223:2324393-2324668, length 92, E.\_coli\_0157\_H7\_EDL933, parE  
MLPVLWLESADTDLDDITSYIARFDIDAERLWQRLRGCVLPLSEHPYLYPPSDRVPGLR  
EIVAHPNYIILYRVTTSSVEVVNVIHARRQFP

>parE|16445223:c1256683-1256967, length 95, E.\_coli\_0157\_H7\_EDL933, parE  
MLPILWLP SARDDL RQIITYIAKENPPAARRLKI RIETSVLPLSEHPYLYPPSERVSGLR  
EIVTHPNYIILYRVAASSIEIVSVTHSRRQFPFSI

**Shigella flexneri\_2a\_2457T**

>relE|30061571:c2077698-2077949, length 84, Shigella\_flexneri\_2a\_2457T, RelE/YoeB  
MKLIWSEESWDDYLYWQETDKRIVKINELIKDTRRTPFEGKKGPEPLKHNLSGFWSSRI  
TEEHRLVYAVTDDSLLIAACRYHY

**Salmonella typhimurium LT2**

>parD|16763390:c3102440-3102715, length 91, Salmonella\_typhimurium\_LT2, ParD  
MTVDLGDELREFIESLIESGDYRTQSEVIRESLRLLREKQAESRLQALRELLAEGLSNGE  
PQAWEKDAFLRKVKVTGMIKPDENGKINAKGQ

>parE|16763390:c3102178-3102468, length 96, Salmonella\_typhimurium\_LT2, ParE  
MRMVKLTTPKASEDL ENIWHYGWQHFG EIQADRYINHLSEIFSIMSANNIGTPRPELGEYI  
YALPFRHIIYFIQSVTEVIVIRILSQNDAGKHVNWL

>higB|16763390:4241948-4242235, length 103, Salmonella\_typhimurium\_LT2, HigB  
MQFIETELFTEDVKKLLDDEYHKLQVFMHQHPDCGDVIQETGGLRKMWRWGARGKGRSG  
VRIIYFHRSQRYEIRLLLIYQKGIKDDLTPQEKAVLRMLNERW

>higA|16763390:4241636-4241944, length 96, Salmonella\_typhimurium\_LT2, HigA  
MDKVLFERLTQSMSQMNIEI EGTR EPRSRTFHIDAMKIKEIRQASGLSQSKFAELISVNVD  
TLRNWEQGRSPTGPAKALLRAIANDPRNVIQALRY

**Salmonella typhi**

>parD|16758993:c2958334-2958059, length 91, corrected start, Salmonella\_typhi, ParD  
MTVDLGDELREFIESLIESGDYRTQSEVIRESLRLLREKQAESRLQALRELLAEGLSNGE  
PQAWEKDAFLRKVKVTGMIKPDENGKINAKGQ

>parE|16758993:c2957794-2958012, length 73, Salmonella\_typhi, ParE  
MRTVKLTTPKASEDL ENIWHYGWQHFG EIQADRYIHHLSEIFSIMSANNIGTPRPELGEYI  
YALPFRHIIYFI

**Salmonella typhi Ty2**

>parD|29140543:c2944229-2943954, length 91, corrected start, Salmonella\_typhi\_Ty2, ParD  
MTVDLGDELREFIESLIESGDYRTQSEVIRESLRLLREKQAESRLQALRELLAEGLSNGEPQAWEKDAFL  
RKVKVTGMIKPDENGKINAKGQ

>parE|29140543:c2943689-2943907, length 73, Salmonella\_typhi\_Ty2, ParE  
MRTVKLTTPKASEDL ENIWHYGWQHFG EIQADRYIHHLSEIFSIMSANNIGTPRPELGEYI  
YALPFRHIIYFI

**Yersinia pestis CO92 chr.**

>higA|16120353:c964230-964379, length 50, Yersinia\_pestis\_CO92\_chr., HigA  
MDNKRQPPSLSHEQVVARMLKPAVRAEYERLERQDFAIIDETLKGIIHSE

**Yersinia pestis KIM chr**

>relE|22123922:c3599007-3599225, length 86, Yersinia\_pestis\_KIM\_chr, solitary RelE  
MVKVDWSRKAVKQLLSIDARYRKP ISEKVNKLTNFPVVDLIDIKLQMGDSQFRMRVGNRY  
VIFQIVEGTPVICITIQEVKRRTTATY

>relB|22123922:c3399757-3400077, length 107, Yersinia\_pestis\_KIM\_chr, RelB  
MLMKTIKHYLTPEGRDLYMEYKSLRDSIAKAKISSRVNRIASGNFGDHKPCREGVWELR  
IDQGPYRVVYSLVDGEVVLVLLGGDKRSQNADIDQAIIVCLKDYLTR

>higA|22123922:c3594262-3594411, length 50, Yersinia\_pestis\_KIM\_chr, HigA  
MDNKRQPPSLSHEQVVARMLKPAVRAEYERLERQDFAIIDETLKGIIHSE

>higB|22123922:c3599007-3599264, length 108, Yersinia\_pestis\_KIM\_chr, HigB  
MNYTIEYYDDVDVITQLLAQFISLQANFISLAKRMKRYGIKMVDVAPMHHYHEDVFELCFYE  
PKGWNRVIFMAQIDWQIVILHIVVQKTA YMPWKEKGA AKRMKELRFG

>higA|22123922:2218599-2218967, length 123, Yersinia\_pestis\_KIM\_chr, HigA  
MVSLLIPFFTEQGRIMYKISLLRLAQRELVRPVGIVAVLIKAMDELEACGHELREPYVRD  
MGQGLKELRVSAKEGIGRFFFCFLHRQVYI IHLQKKTQKTPRRTLILAYRRMKELKRR  
LQS

>phd|22123922:2738880-2738578, length 101, Yersinia\_pestis\_KIM\_chr, Phd  
MQLIRYSLSYTLCKNKNGYNPFTTAENSMCQRFSIYNS EDNVM SHALKNADRLYIIPPRDK  
GTKAYPRASMDTSSTHADQVKNAFAFGFSRYEKAMEELSKV

**Vibrio cholerae chromosome 2**

>relB|15600771:c343886-343602, length 94, corrected start, Vibrio\_cholerae\_chromosome\_2, RelB  
MDTRIQFRVDEETKRLAQQAESQGRTLSDACRELTEQLAEQQRKALSHDAWLTEQVNAFQEFKFDGSKA  
VFIEHDI AKARMAERKAKIRNRGHA

>relB|15600771:c433678-433394, length 94, corrected start, Vibrio\_cholerae\_chromosome\_2, RelB

MDTRIQFRVDEETKRLAQQMAESQGRTLSDACRELTEQLAEQQRKALSHDAWLTEQVNQAFEFKFDGSGKA  
VFIEHDIAKARMAERKAKIRNRGHA

>phd|15600771:418614-418781, length 56, *Vibrio\_cholerae\_chromosome\_2*, phd, corrected GI:15601235  
MNRKVEAYGVDAVERPKIKASKKLDLTGDAGRQIVKSETKLALRTHQKTFTKLADM

**Vibrio parahaemolyticus chr\_1**

>relB|28896774:1935517-1935800, length 94, corrected start, *Vibrio parahaemolyticus\_chr\_1*, RelB  
MDTRIQFRVDEETKRLAQQMAESQGRTLSDACRELTEQLAEQQRKTLSDAWLVEQVNLAFEFKFDGSGKS  
VFLEHQTAKSMEERKARIRNRGKQ

**X. campestris pv ATCC 33913**

>relB|21240774:c74344-74069, length 93, corrected start, *X\_axonopodis\_pv\_citri\_str\_306*, RelB  
MGMPDLVHLVDAARWDAEGGKTKRRPERSEAMNVKELDARYAVSLRTQTEHALADPRPALSSAQAKQOME  
TLKTQORAALEAALAAGKTRA

>parD|21240774:c3665126-3665371, length 82, *X\_axonopodis\_pv\_citri\_str\_306*, parD  
MSPGRRKMPRLRRTALSSTPLRKKSRRTSAAHSMKRSNAGLLSKAATTRCPGRTYAST  
CSSLLTERTPRHRSPAPSSADR

**Xylella fastidiosa chr**

>relE|15836605:c1620819-1621091, length 91, *Xylella fastidiosa\_chr*, relE  
MAWTIDYTDTAQQLRKLKDHMARRIVDFMDERIAGLENPRSSGKALTGPLGGFWRYRVG  
DFRVVCAIQDSVLRVVLVGVGHRGEMRREC

>higA|15836605:c527947-528210, length 88, *Xylella fastidiosa\_chr*, higA  
MKVLRFLGDSLMLRQFPEDACSDAGYQLDKIQRGEQPKDFKPMPSIGKGVVEELRIWDDS  
GTYRVVYARLADAVYVHLHAFQKKTQATSKRDVELAKRRYTELTKGAK

>higB|15836605:1630197-1629883, length 105, *Xylella fastidiosa\_chr*, HigB  
MIRCSGTCVSRKTFSSGQKVPVEALLQLLAGGAASMAPRPARIKMPHEAERWYQKMPQR  
DVRVLVGTDRTRTSYFDHQSLNLGRDRCLKSNIIITITLSVIVVY

>vapB|15836605:304978-305193, length 72, *Xylella fastidiosa\_chr*, VapB  
MDATVAERQITLTKRVRDALGLTKGTVLKVELEGGRIILRKSVDIAIARARGRFILDDF  
GCSAIATKTDKQ

**Xylella fastidiosa Temecula1**

>relB|28197945:1298015-1298314, length 100, *Xylella fastidiosa\_Temecula1*, relB  
MYRLAQVVDIAIKRLSGVHVHSAHAQQLGTHWAVSCGGFSEGSMLAMTQSECLGIIELO  
CSSFLTGYRRIALCLQTQLSVPALTRTSKHHQPCWRRWA

>relE|28197945:1298354-1298761, length 136, *Xylella fastidiosa\_Temecula1*, relE  
MPARRRCRCSRWCRKLPSPQCVKPVLVTSRALIVLRRSWRTRCMRISQTGQFKRDYKRE  
AKGQHRATLDEELIHVLEALTCDHPLRHHHALTGDWDRDCHIKPDLVLIYRKPND  
ETLQLVRIGSHSELGL

>higA|28197945:1167816-1168139, length 108, *Xylella fastidiosa\_Temecula1*, higA  
MKVLRFLGDSLMLRQFPEDACSDAGYQLDKIQRGEQPKDFKPMPSIGKGVVEELRIWDDS  
GTYRVVYARLADAVYVHLHAFQKKTQATSKRDVELAKRRYTELTKGAK

>vapB|28197945:303404-303628, length 75, *Xylella fastidiosa\_Temecula1*, vapB  
MDATVAERQITLTKRVRDALGLTKGTVLKVELEGGRIILRKSVDIAIARARGRFILDDL  
DDFGCSATATKTDKQ

**Pseudomonas aeruginosa**

>parD|15595198:796960-797238, length 93, *Pseudomonas aeruginosa*, ParD  
MFPQQWRYRLMRVETISYLKRHAADLDLSEPMVVTQNGVPAYVVESSYAERKQRDEAIALV  
KLLAIGSRQYAEQKHSVDDLKARLSRRFAQPE

>higB|15595198:c5242573-5242848, length 92, *Pseudomonas aeruginosa*, HigB  
MILTFRCDETRQLFETGLSRRWGAILLTVATRKLAMLHAATELRDLRSPGNRLEPLQGR  
AGQHSIRINDQWRVCFVWTDAGPEEVEIVDYH

**Pseudomonas putida KT2440**

>higA|26986745:334364-334672, length 103, *Pseudomonas putida\_KT2440*, HigA  
MRSSWHPCRPOYICISPLWLRRIQYQDPERPIKSLTESVGAGAIELIINGSFAFRVYVAK  
FADMVVVLSHFVKTNRSERHAMQVAEQRMKELKQELRKMGYRV

>higB|26986745:334049-334360, length 104, *Pseudomonas putida\_KT2440*, HigB  
MPGVVWITIWIGEPASFEGRVVRKPSLSSMSIMASKVNFSSILPFASSDMRDWVTFSLA  
AASCLRPIFLMQSVMMKDKSIFKAILLAVSASWVAWKGLSWN

>higA|26986745:c1418120-1418494, length 125, *Pseudomonas putida\_KT2440*, HigA  
MFAFHNEKAPESFRFQGLDLVWRDRDLNPRYCCQYNGFRIRPVRLRHLNSAAHHTSVL  
LKRKSFQKNRVVSACVNVPLTAARPGAWQLLRRLRSRRPGGGSGPCPSSCGFPCTG  
GSRPG

**Leptospira intrerrogans I**

>relE|24212700:3672435-3672671, length 79, *Leptospira intrerrogans\_I*, relE  
MSKFWPSLKNSTQGIPIEQNYKIRIPIASKGKSGGARVISCVVFVEKTVFLVSIYD  
KSEKENISDKDLEKIIKNL

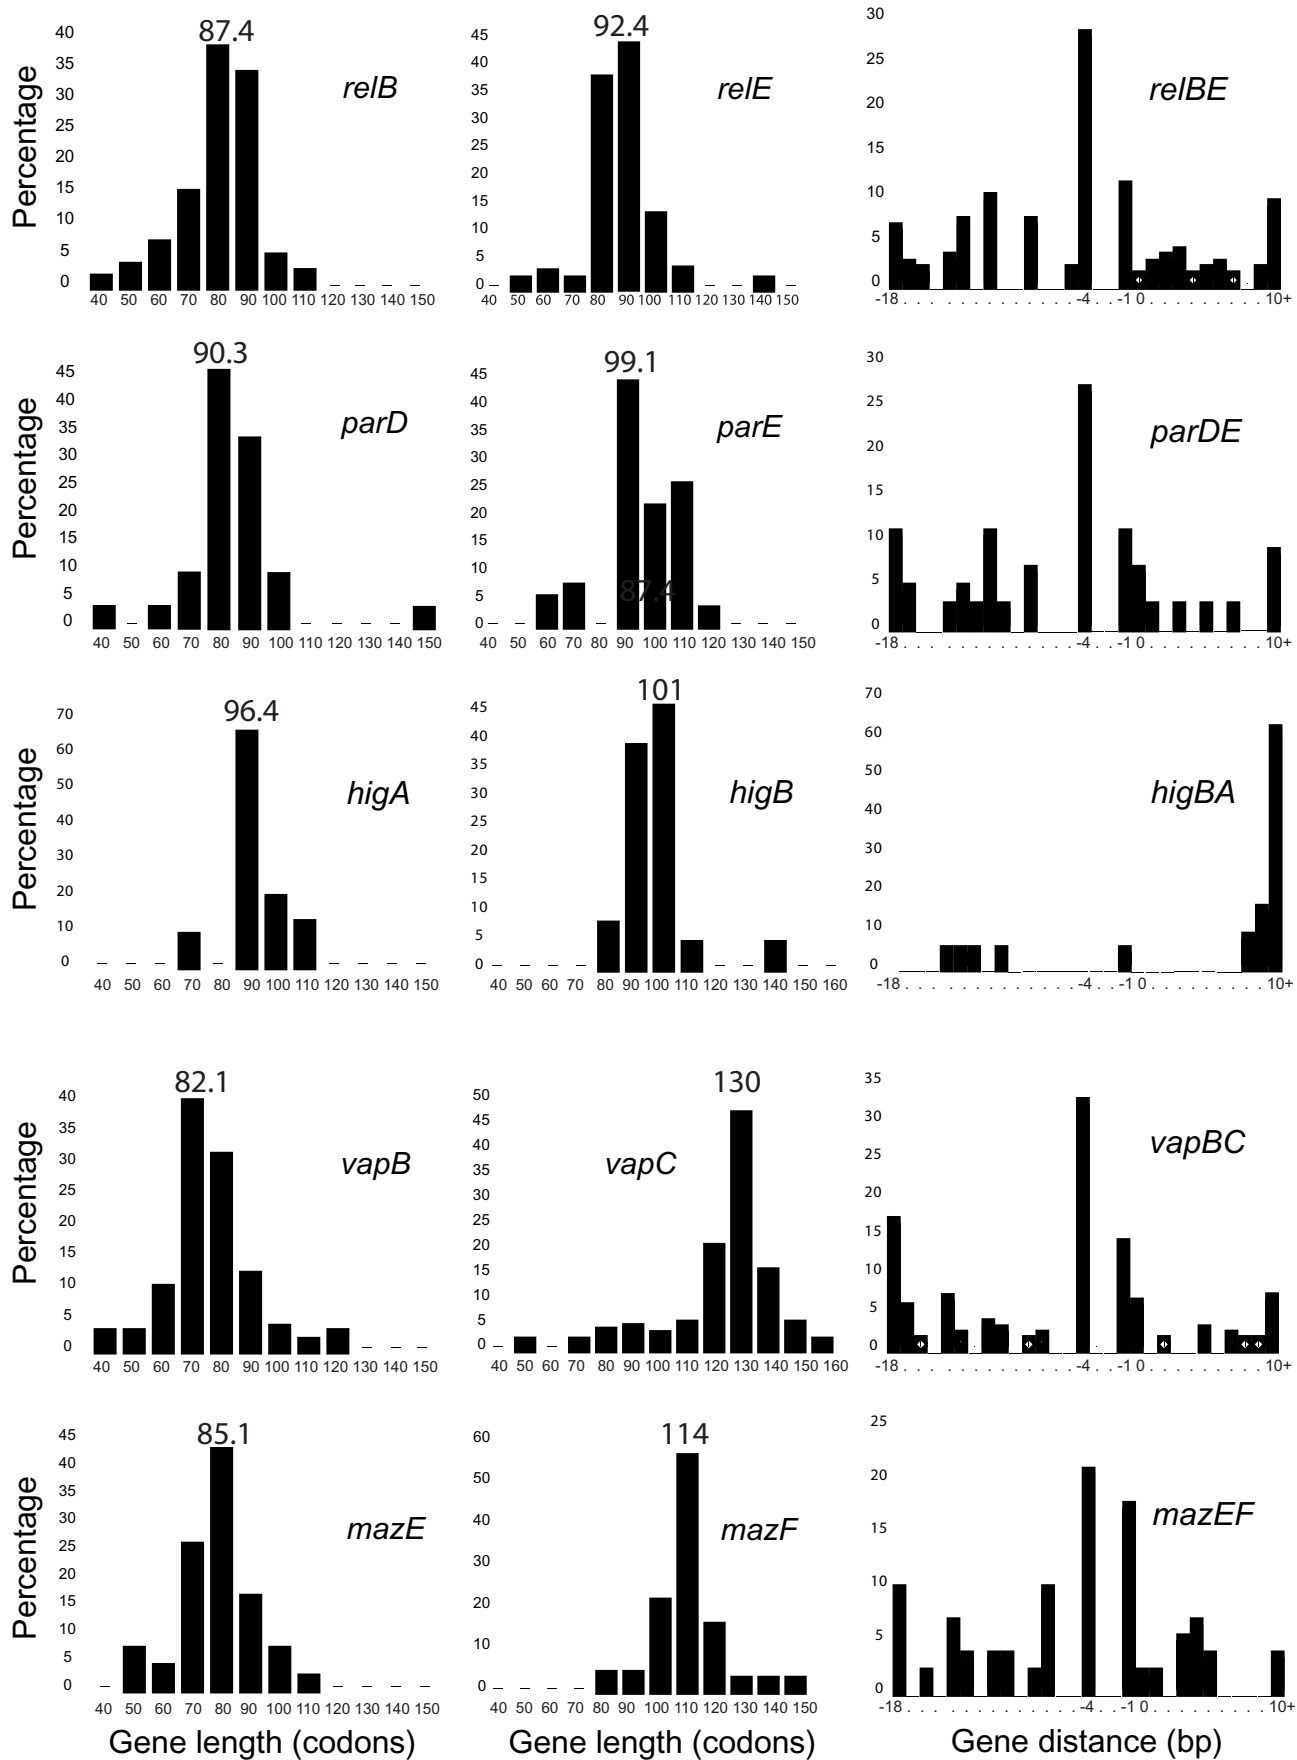

Figure S1



## Legend to Figure S1

**Fig. S1. Gene length distributions and distances.** Statistical analysis of the five most abundant TA gene families. The first and second columns show the antitoxin and toxin gene length distributions (in codons) and the third column shows the distances between the genes. Number at each insert is average of gene length. The statistics shown was based on 633 TA loci (from Table S2).
